# Supplementary material for: Ferromagnetic α-Fe2O3 NPs: a potential catalyst in Sonogashira–Hagihara cross coupling and hetero-Diels–Alder reactions
Source: Royal Society of Chemistry journal article supplement (doi:10.1039/c5gc02337h), 2015-10-15

## Electronic Supplementary Information

### Ferromagnetic $\alpha$ -Fe<sub>2</sub>O<sub>3</sub> NPs: A potential catalyst in Sonogashira Hagihara cross coupling and Hetero-Diels-Alder reactions

Meenal Kataria, Subhamay Pramanik, Navleen Kaur, Manoj Kumar, Vandana Bhalla,\*

Department of Chemistry, UGC Sponsored Centre for Advanced Studies-1, Guru Nanak Dev University, Amritsar 143005, and Punjab, India

E-mail: [vanmanan@yahoo.co.in](mailto:vanmanan@yahoo.co.in)

[vanmanan@yahoo.co.in](mailto:vanmanan@yahoo.co.in)

- S4-S5** Table S1: Comparison of catalytic activity of *in situ*  $\alpha$ -Fe<sub>2</sub>O<sub>3</sub> nanoparticles for synthesis of C-C cross coupling products by Sonogashira Hagihara reaction over other procedures reported in literature.
- S6** Table S2: Comparison of catalytic activity of *in situ*  $\alpha$ -Fe<sub>2</sub>O<sub>3</sub> nanoparticles for synthesis of pyran derivatives by hetero Diels Alder reaction over other procedures reported in literature.
- S7** Table S3: Comparison table between the present catalytic system and previously reported system (*Angew. Chem. Int. Ed.* 2008, **47**, 4862.).
- S8** UV-vis spectroscopic titration of derivative **1** (5  $\mu$ M) in H<sub>2</sub>O/EtOH (7:3, v/v) upon the addition Fe<sup>3+</sup> ions (0-25 equiv.) and fluorescence emission spectra of derivative **1** (5 $\mu$ M) upon additions of 25 equiv. of 70 wt% *tert*-butyl hydroperoxide solution in H<sub>2</sub>O/THF (3/7, v/v).
- S9** Fluorescence spectroscopic titration of derivative **1** (5  $\mu$ M) in H<sub>2</sub>O/EtOH (7:3, v/v) upon the addition Fe<sup>3+</sup> ions (0-25 equiv.) and UV-vis spectra showing the presence of Fe (0) nanoparticle bands.
- S10** UV-vis spectroscopic titration of derivative **1** (5  $\mu$ M) in H<sub>2</sub>O/EtOH (7:3, v/v) upon additions of 25 equiv. of 70 wt% *tert*-butyl hydroperoxide solution in H<sub>2</sub>O/THF (3/7, v/v) and Scheme showing the formation of oxidized species of derivative **1** on the addition of oxidizing agent.
- S11** Overlay of NMR spectra of oxidized species of derivative **1** and derivative **1**.
- S12** Overlay of IR spectra of both oxidized species of derivative **1** and derivative **1**.

- S13** ESI-MS mass spectra of oxidized species of derivative **1** and TEM, DLS analysis of derivative **1** (5  $\mu\text{M}$ ) showing the size of  $\text{Fe}_2\text{O}_3$  nanorods at temperature  $70^\circ\text{C}$
- S14** TEM, DLS of derivative **1** (5  $\mu\text{M}$ ) showing the size of  $\text{Fe}_2\text{O}_3$  nanorods at pH (12) and UV-vis spectroscopic titration of derivative **1** (5  $\mu\text{M}$ ) in  $\text{H}_2\text{O}/\text{EtOH}$  (7:3, v/v) by varying  $\text{Fe}^{3+}$  ions to ligand ratio
- S15** TEM images and Raman spectra of  $\alpha\text{-Fe}_2\text{O}_3$  nanoparticles prepared by commercial method.
- S16** XRD pattern of spherical  $\alpha\text{-Fe}_2\text{O}_3$  nanoparticles prepared by commercial method.
- S17** UV-vis spectra of reaction mixture show the interaction between substrates & catalyst and UV-vis spectra of reaction mixture showing the completion of reaction.
- S18** Kinetic profile showing the formation of product with time when the catalyst loading is 0.005 mol & 0.004 mol.
- S19** Kinetic profile showing the formation of product with time when the catalyst loading is 0.0035 mol & 0.0025 mol.
- S20** Kinetic profile showing the formation of product with time when the catalyst loading is 0.0015 mol.
- S21** Photograph showing the magnetic separation of *in situ* generated  $\alpha\text{-Fe}_2\text{O}_3$  nanoparticles.
- S22** XRD & TEM images of recycled  $\alpha\text{-Fe}_2\text{O}_3$  nanoparticles.
- S23** Atomic Absorption Studies (AAS) of the residual liquid left after the magnetic separation of catalyst.
- S24** IR spectra of (A) *p*-nitrobenzaldehyde (B) separated reaction mixture containing *p*-nitrobenzaldehyde and *in situ* generated  $\alpha\text{-Fe}_2\text{O}_3$  NPs
- S25**  $^1\text{H}$  and  $^{13}\text{C}$  NMR of spectrum of **4a**.
- S26**  $^1\text{H}$  and  $^{13}\text{C}$  NMR of spectrum of **4b** and **4c**.
- S27**  $^1\text{H}$  and  $^{13}\text{C}$  NMR of spectrum of **4d**.
- S28**  $^1\text{H}$  and  $^{13}\text{C}$  NMR of spectrum of **4e**.
- S29**  $^1\text{H}$  and  $^{13}\text{C}$  NMR of spectrum of **4f**.

- S30**  $^1\text{H}$  and  $^{13}\text{C}$  NMR of spectrum of **4g**.
- S31**  $^1\text{H}$  and  $^{13}\text{C}$  NMR of spectrum of **4h**.
- S32**  $^1\text{H}$  and  $^{13}\text{C}$  NMR of spectrum of **4i**.
- S33**  $^1\text{H}$  and  $^{13}\text{C}$  NMR of spectrum of **4j**.
- S34**  $^1\text{H}$  and  $^{13}\text{C}$  NMR of spectrum of **4k**.
- S35**  $^1\text{H}$  and  $^{13}\text{C}$  NMR of spectrum of **4l**.
- S36**  $^1\text{H}$  and  $^{13}\text{C}$  NMR of spectrum of **4m**.
- S37**  $^1\text{H}$  and  $^{13}\text{C}$  NMR of spectrum of **6**.
- S38**  $^1\text{H}$  and  $^{13}\text{C}$  NMR of spectrum of **8**.
- S39**  $^1\text{H}$  and  $^{13}\text{C}$  NMR of spectrum of **14a**.
- S40**  $^1\text{H}$  and  $^{13}\text{C}$  NMR of spectrum of **14b**.
- S41**  $^1\text{H}$  and  $^{13}\text{C}$  NMR of spectrum of **14c**.
- S42**  $^1\text{H}$  and  $^{13}\text{C}$  NMR of spectrum of **14d**.
- S43**  $^1\text{H}$  and  $^{13}\text{C}$  NMR of spectrum of **14e**.
- S44**  $^1\text{H}$  and  $^{13}\text{C}$  NMR of spectrum of **14f**.
- S45**  $^1\text{H}$  and  $^{13}\text{C}$  NMR of spectrum of **14g**.
- S46**  $^1\text{H}$  and  $^{13}\text{C}$  NMR of spectrum of **14h**.
- S47**  $^1\text{H}$  and  $^{13}\text{C}$  NMR of spectrum of **14i**.
- S48**  $^1\text{H}$  and  $^{13}\text{C}$  NMR of spectrum of **14j**.
- S49**  $^1\text{H}$  and  $^{13}\text{C}$  NMR of spectrum of **15**.
- S50**  $^1\text{H}$  and  $^{13}\text{C}$  NMR of spectrum of **16**.

**Table S1:** Comparison of catalytic activity of  $\alpha$ -Fe<sub>2</sub>O<sub>3</sub> NPs for Sonogashira cross coupling reaction over other catalytic system reported in the literature.

| Serial No. | Publication                                                | Catalyst used                                                                                       | Use of Noble metal | Use of CuI | Use of Amine | Solvent                         | Nano catalysis | Recycling      | Reaction time | Temp. required (in °C) | Isolated Yield (Product, %) |
|------------|------------------------------------------------------------|-----------------------------------------------------------------------------------------------------|--------------------|------------|--------------|---------------------------------|----------------|----------------|---------------|------------------------|-----------------------------|
| 1          | Present manuscript                                         | $\alpha$ -Fe <sub>2</sub> O <sub>3</sub> , K <sub>2</sub> CO <sub>3</sub>                           | No                 | No         | No           | Ethylene glycol (green solvent) | Yes            | Yes (13 times) | 13 h          | 80                     | 84                          |
| 2          | <i>Green Chem.</i> , 2015, <b>17</b> , 1893-1898           | Pd-CS, Pd-CS-Glu and Pd-CS-SH, K <sub>2</sub> CO <sub>3</sub>                                       | Yes                | No         | No           | EtOH/Water                      | Yes            | Yes (6 times)  | 6 h           | 65                     | 98                          |
| 3          | <i>Green Chem.</i> , 2015, <b>17</b> , 1071-1076           | Pd/C, DABCO                                                                                         | Yes                | No         | Yes          | $\gamma$ -Valerolactone         | No             | No             | 4 h           | 60-100                 | 99                          |
| 4          | <i>Green Chem.</i> , 2014, <b>16</b> , 2515-2522           | PEG-2000, PdCl <sub>2</sub> (PPh <sub>3</sub> ) <sub>2</sub>                                        | Yes                | No         | Yes          | Water, Et <sub>3</sub> N        | No             | No             | 24 h          | 25                     | 95                          |
| 5          | <i>Chem. Commun.</i> , 2015, <b>51</b> , 10871-10874       | L <sub>4</sub> -Pd                                                                                  | Yes                | No         | Yes          | DMF                             | No             | Yes (5 times)  | 1.5 h         | 90                     | 97                          |
| 6          | <i>Chem. Eur. J.</i> , 2014, <b>20</b> , 1-13              | PEGylated $\alpha$ -Fe <sub>2</sub> O <sub>3</sub> -Pd NPs                                          | Yes                | No         | Yes          | THF                             | Yes            | Yes            | 24 h          | 65                     | 86                          |
| 7          | <i>Org. Lett.</i> , 2014, <b>16</b> , 3724-3727            | (N-heterocyclic carbene)-Cu and (N-heterocyclic carbene)-Pd complexes                               | Yes                | Yes        | No           | DMSO                            | No             | No             | 24 h          | 120                    | 94                          |
| 8          | <i>J. Mater. Chem. A</i> , 2014, <b>2</b> , 484-491        | Pd-PPh <sub>2</sub> -MCM-41@SiO <sub>2</sub> @Fe <sub>3</sub> O <sub>4</sub> (Very complicated)     | Yes (Pd)           | No         | No           | Water                           | No             | Yes            | 4 h           | 70                     | 95                          |
| 9          | <i>Org. Lett.</i> , 2013, <b>15</b> , 65-67                | Pd-Cu dual Reactor                                                                                  | Yes                | Yes        | No           | DMF                             | No             | No             | -             | 120                    | 95                          |
| 10         | <i>Angew. Chem. Int. Ed.</i> 2013, <b>52</b> , 11554-11559 | Pd(0) nanoparticle, KOAc                                                                            | Yes (Pd)           | No         | Yes          | NMP (toxic)                     | Yes            | No             | 24 h          | 160                    | 83                          |
| 11         | <i>Green Chem.</i> , 2013, <b>15</b> , 2349-2355           | Pd catalyst, K <sub>2</sub> CO <sub>3</sub>                                                         | Yes (Pd)           | No         | No           | EtOH/Chlorobenzene (flammable)  | No             | Yes            | 18 h          | 60                     | 88                          |
| 12         | <i>Green Chem.</i> , 2013, <b>15</b> , 2132-2042           | Fe <sub>3</sub> O <sub>4</sub> @-SiO <sub>2</sub> @PPh <sub>2</sub> @Pd(0), NaOH (Very complicated) | Yes (Pd)           | No         | No           | Water                           | No             | Yes            | 15 min-4 h    | 80                     | 91                          |
| 13         | <i>Chem. Eur. J.</i> , 2013, <b>19</b> , 14024-14029       | 5% Pd-Au/C, K <sub>3</sub> PO <sub>4</sub>                                                          | Yes (Pd, Au)       | No         | No           | <i>i</i> PrOH/H <sub>2</sub> O  | No             | No             | 20 h          | 80                     | 73                          |

|    |                                                           |                                                        |                  |    |    |                      |     |     |      |     |    |
|----|-----------------------------------------------------------|--------------------------------------------------------|------------------|----|----|----------------------|-----|-----|------|-----|----|
| 14 | <i>Adv. Synth. Catal.</i> ,<br>2011, <b>353</b> , 125-132 | Fe <sub>3</sub> O <sub>4</sub>                         | No               | No | No | Ethylene glycol      | Yes | Yes | 35h  | 125 | 92 |
| 15 | <i>Chem. Commun.</i> ,<br>2010, <b>46</b> , 6524-6526     | Pd@meso-SiO <sub>2</sub><br>(Very complicated)         | Yes (Pd)         | No | No | EtOH                 | No  | Yes | 30 h | 80  | 55 |
| 16 | <i>Angew. Chem. Int. Ed.</i> 2007, <b>46</b> , 1536-1538  | Au(I), K <sub>3</sub> PO <sub>4</sub>                  | Yes (Au)         | No | No | <i>O</i> -Xylene     | No  | No  | 24 h | 130 | 54 |
| 17 | <i>Langmuir</i> , 2010, <b>14</b> , 12225-12229           | Au-Ag-Pd trimetallic nanoparticles                     | Yes (Pd, Au, Ag) | No | No | DMF-H <sub>2</sub> O | No  | No  | 2 h  | 120 | 94 |
| 18 | <i>Org. Lett.</i> , <b>2</b> , 2000, 2935-2938            | Pd(PPh <sub>3</sub> ) <sub>2</sub> , Ag <sub>2</sub> O | Yes (Pd, Ag)     | No | No | THF                  | No  | No  | 8 h  | 60  | 60 |

**Table S2:** Comparison of catalytic activity of  $\alpha$ -Fe<sub>2</sub>O<sub>3</sub> NPs for hetero-Diels–Alder reaction over other catalytic system reported in literature.

| Sr. No. | Publication                                       | Catalyst Used                                | Use of noble metal | Cost of catalyst     | Use of Nano catalyst | Amount of Catalyst used | Use of activated diene/dienophile | Solvent                                        | Additives                                                  | Tem p. (°C) | Time     | Yield %   | Recycl ability |
|---------|---------------------------------------------------|----------------------------------------------|--------------------|----------------------|----------------------|-------------------------|-----------------------------------|------------------------------------------------|------------------------------------------------------------|-------------|----------|-----------|----------------|
| 1       | Present manuscript                                | $\alpha$ -Fe <sub>2</sub> O <sub>3</sub> NPs | No                 | Very cheap           | Yes                  | 1 mol %                 | No                                | <i>p</i> -xylene (90%)/Neat condition (68%)    | No                                                         | 60          | 10h      | Upto 90%  | Yes            |
| 2       | <i>Org. Lett.</i> , 2015, 17, 3506-3509           | LiClO <sub>4</sub>                           | No                 | Costly               | No                   | 1 equiv.                | Yes                               | DCE/MeCN                                       | Yes                                                        | 80          | 2h       | 94        | No             |
| 3       | <i>Org. Lett.</i> , 2015, 17, 3536-3539           | CuI in 4Å MS                                 | No                 | Costly and Sensitive | No                   | 10 mol%                 | Yes                               | THF/t-BuOH (1:1)                               | Yes (Et <sub>4</sub> Nl, Cs <sub>2</sub> CO <sub>3</sub> ) | 25          | 1-48     | 90        | No             |
| 4       | <i>J. Am. Chem. Soc.</i> 2014, 136, 17714–17717   | PCN-223 porphyrinic ZrMOF                    | Yes                | Costly               | No                   | 1 mol%                  | No                                | Toluene                                        | AgBF <sub>4</sub>                                          | 80          | 12 h     | 99        | Yes            |
| 5       | <i>Chem. Commun.</i> , 2014, 50, 14187-14190      | Calcium BINOL-derived phosphates             | No                 | Yes                  | No                   | 2.5 mol%                | Yes                               | DCM                                            | HCl                                                        | Rt          | 12h      | 94%       | No             |
| 6       | <i>Org. Lett.</i> , 2014, 16, 3564-3567           | Cu(I)OTf <sub>2</sub> L                      | No                 | -                    | No                   | 10 mol%                 | Yes                               | Toluene                                        | Base                                                       | 0°C         | Upto 24h | > 90%     | No             |
| 7       | <i>Org. Lett.</i> , 2013, 15, 9-12                | Rh(cod) <sub>2</sub> BF <sub>4</sub>         | Yes                | costly               | No                   | 5 mol %                 | No                                | DCM                                            | Acid                                                       | 80°C        | Upto 24h | Upto 90 % | No             |
| 8       | <i>J. Am. Chem. Soc.</i> , 2012, 134, 5512-5515   | Iron(III) porphyrin catalyst                 | No                 |                      | No                   |                         | No                                | Benzene- upto 90%/ Neat condition- trace yield | No                                                         | 80°C        | 12h      | Upto 90%  |                |
| 9       | <i>J. Am. Chem. Soc.</i> , 2009, 131, 12882-12883 | Chiral phosphoric acid                       | No                 | Yes                  | No                   | 2-100 mol%              | Yes                               | Toluene                                        | -                                                          | RT          | 24 h     | Upto 95 % |                |
| 10      | <i>Org. Lett.</i> , 2008, 10, 13-16               | 1-Np-TADDOL                                  | No                 | -                    | No                   | 20 mol%                 | Yes                               | Toluene/DCM                                    | Acid chloride                                              | -78°C       | 15 min   |           | No             |
| 11      | <i>Org. Lett.</i> , 2004, 6, 13-16                | Ti(OiPr) <sub>4</sub>                        | No                 | costly               | No                   | 5 mol %                 | Yes                               | Toluene                                        | TFA                                                        | 0°C         | 72 h     | Upto 92%  | No             |
| 12      | <i>Org. Lett.</i> , 2003, 5, 7-10                 | Diethyl Zinc                                 | No                 | -                    | No                   | 10 mol%                 | Yes                               | Toluene                                        | Acid                                                       | -20°C       | 30 h     | Upto 99 % | No             |

**Table S3:** Comparison table between the present catalytic system and previously reported system for Sonogashira coupling reactions (*Angew. Chem. Int. Ed.* 2008, **47**, 4862-4865).

| <b>Sr. No.</b> | <b>Points of Comparison on Reaction Conditions</b> | <b>Present Manuscript</b>                    | <b><i>Angew. Chem. Int. Ed.</i> 2008, 47, 4862-4865</b> |
|----------------|----------------------------------------------------|----------------------------------------------|---------------------------------------------------------|
| 1.             | Reactivity towards Substrates                      | Both for aryl iodides and bromides           | Only for aryl Iodides                                   |
| 2.             | Recyclability of catalyst                          | Yes (13 times)                               | No                                                      |
| 3.             | Mechanistic Study                                  | Yes                                          | No                                                      |
| 4.             | Base                                               | K <sub>2</sub> CO <sub>3</sub> (mild, Cheap) | Cs <sub>2</sub> CO <sub>3</sub> (Strong, Costly)        |
| 5.             | Time                                               | 13-24 h                                      | 72 h                                                    |
| 6.             | Solvent                                            | Ethylene Glycol (green solvent)              | Toluene                                                 |
| 7.             | Catalyst Loading                                   | Low catalyst loading (0.5 mol %)             | High catalyst loading (15 mol %)                        |

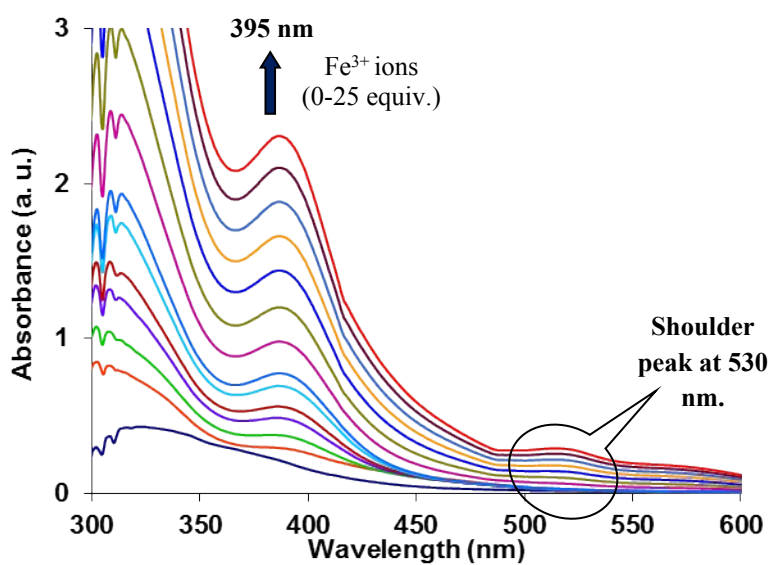

**Figure S1:** UV-vis. spectroscopic spectra of derivative **1** (5  $\mu\text{M}$ ) in  $\text{H}_2\text{O}/\text{EtOH}$  (7:3, v/v) upon the addition  $\text{Fe}^{3+}$  ions (0-25 equiv.).

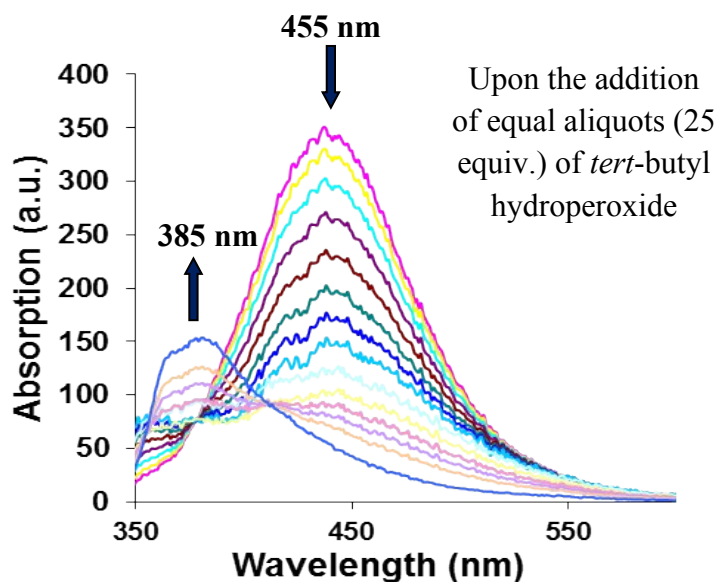

**Figure S2:** Fluorescence spectra of derivative **1** (5  $\mu\text{M}$ ) after the addition of equal aliquots of *tert*-butyl hydroperoxide (a oxidizing agent) in  $\text{H}_2\text{O}/\text{EtOH}$  (7:3, v/v) mixture.



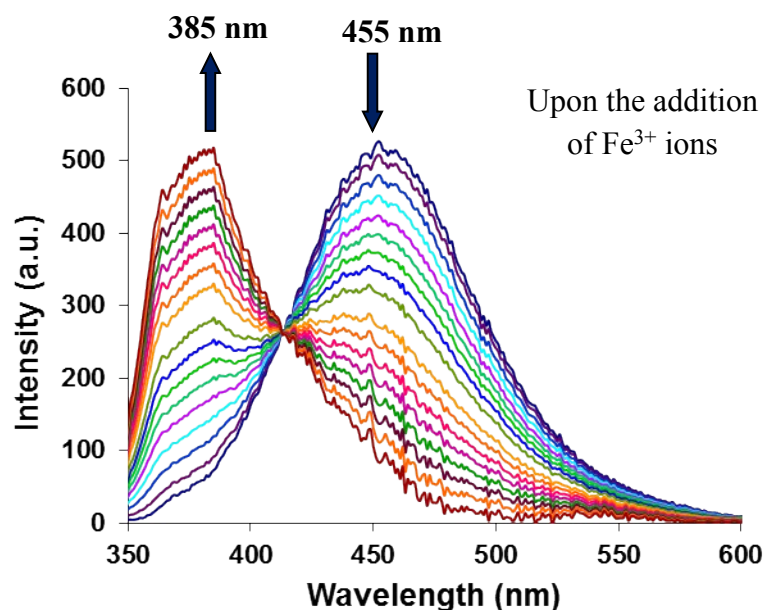

**Figure S3:** Fluorescence spectra of derivative **1** (5  $\mu\text{M}$ ) showing the variation on addition of  $\text{Fe}^{3+}$  ions (0-25 equiv.) in  $\text{H}_2\text{O}/\text{EtOH}$  (7:3, v/v) mixture.

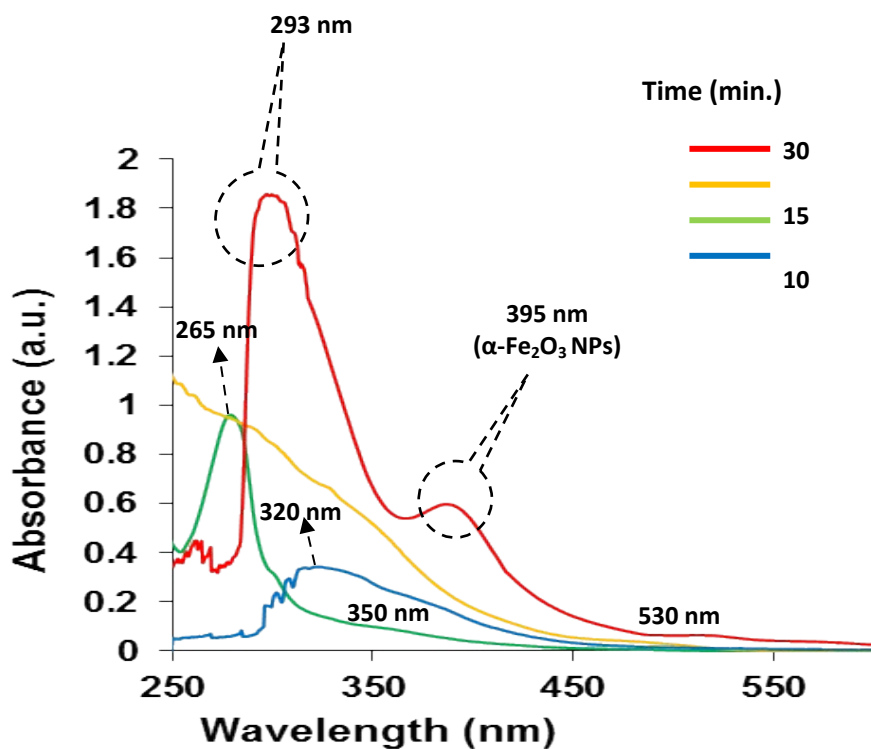

**Figure S4:** UV-vis Spectra showing the formation of Fe (0) Nps bands after keeping the solution of derivative **1** and  $\text{Fe}^{3+}$  ion (0-25 equiv.) in  $\text{H}_2\text{O}/\text{EtOH}$  (3:7, v/v) mixture under inert atmosphere for 10 min and followed by oxidation resulting in the *in situ* formation of  $\text{Fe}_2\text{O}_3$  nanoparticles

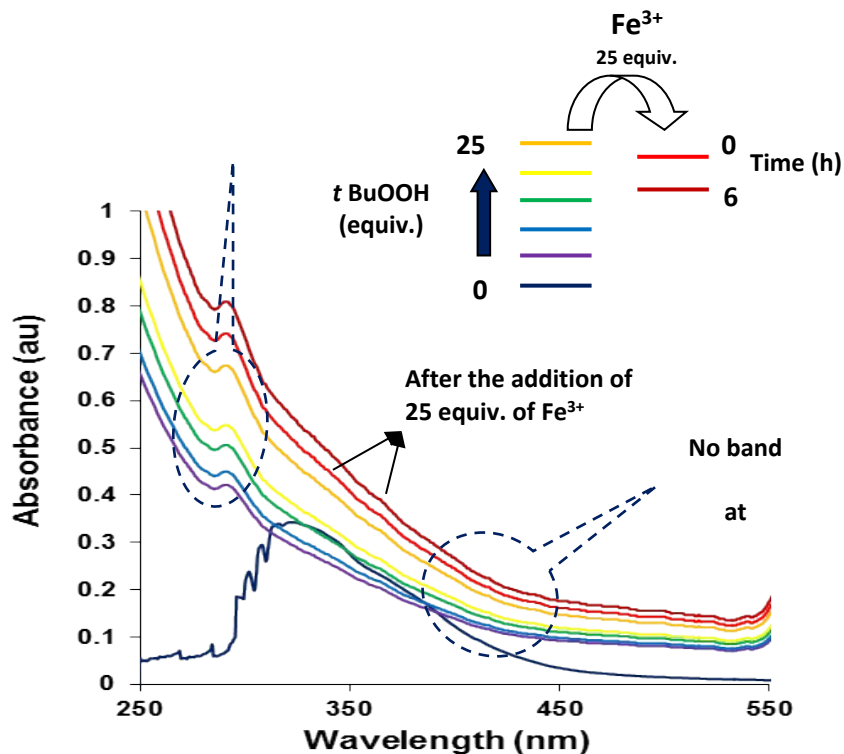

**Figure S5:** UV-vis Spectra of derivative **1** on addition of *tert*-butyl hydroperoxide (0-25 equiv.) in  $\text{H}_2\text{O}/\text{EtOH}$  (3:7, v/v) mixture followed by the addition of  $\text{Fe}^{3+}$  ion (0-25 equiv.).

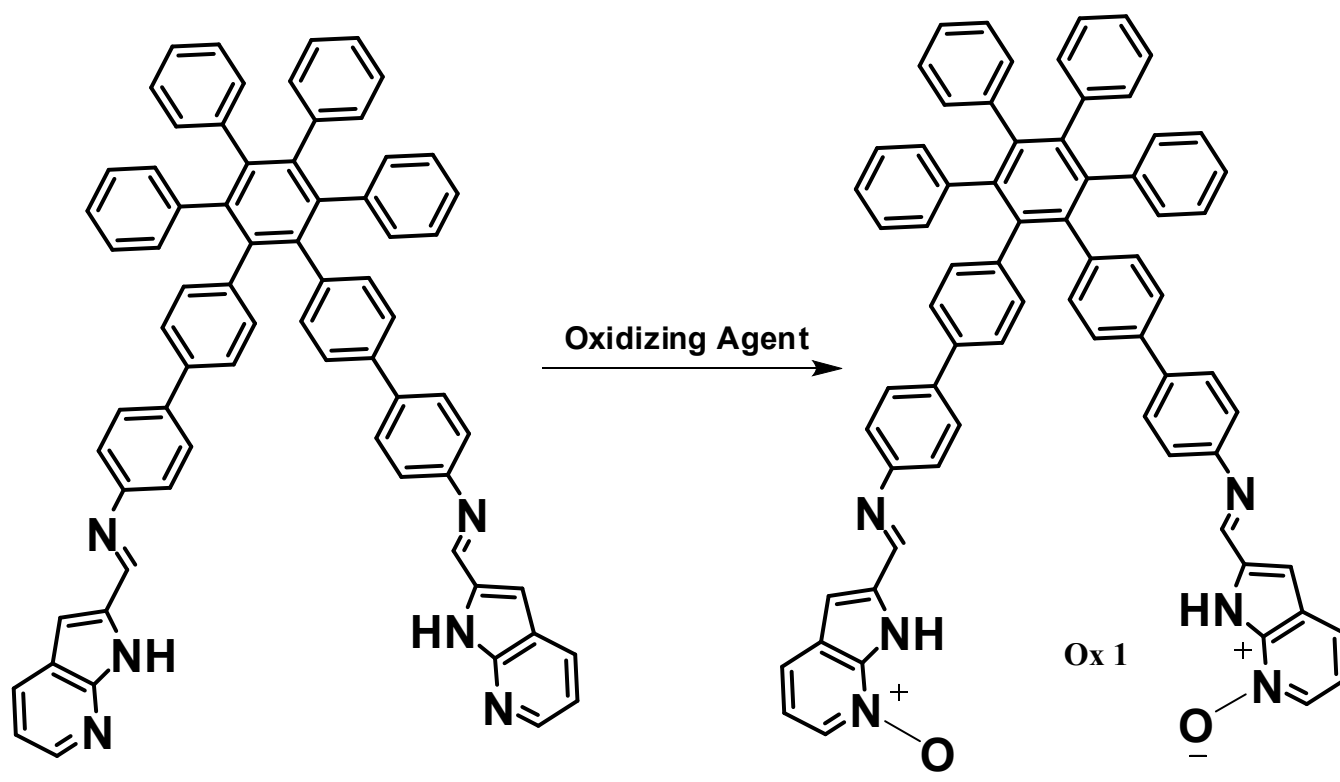

**Scheme 1:** Oxidation of derivative **1** by using *t* BuOOH to yield N-oxide derivative.

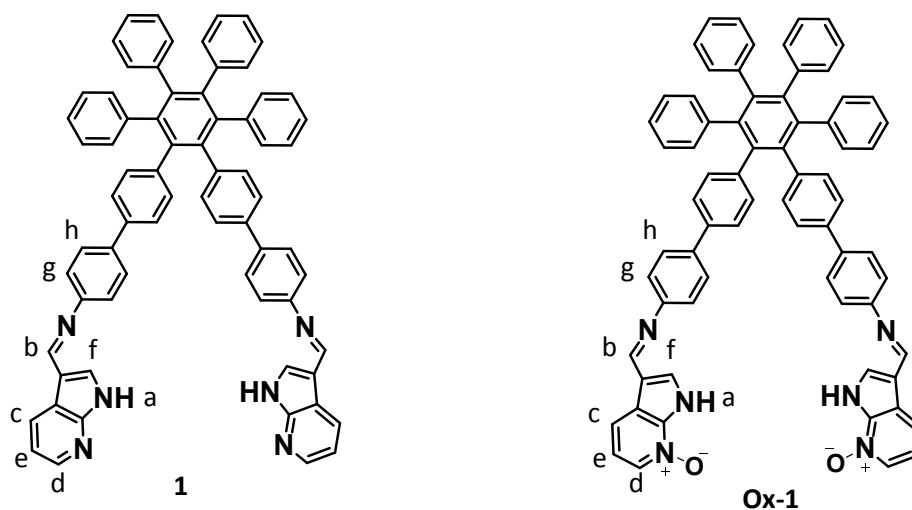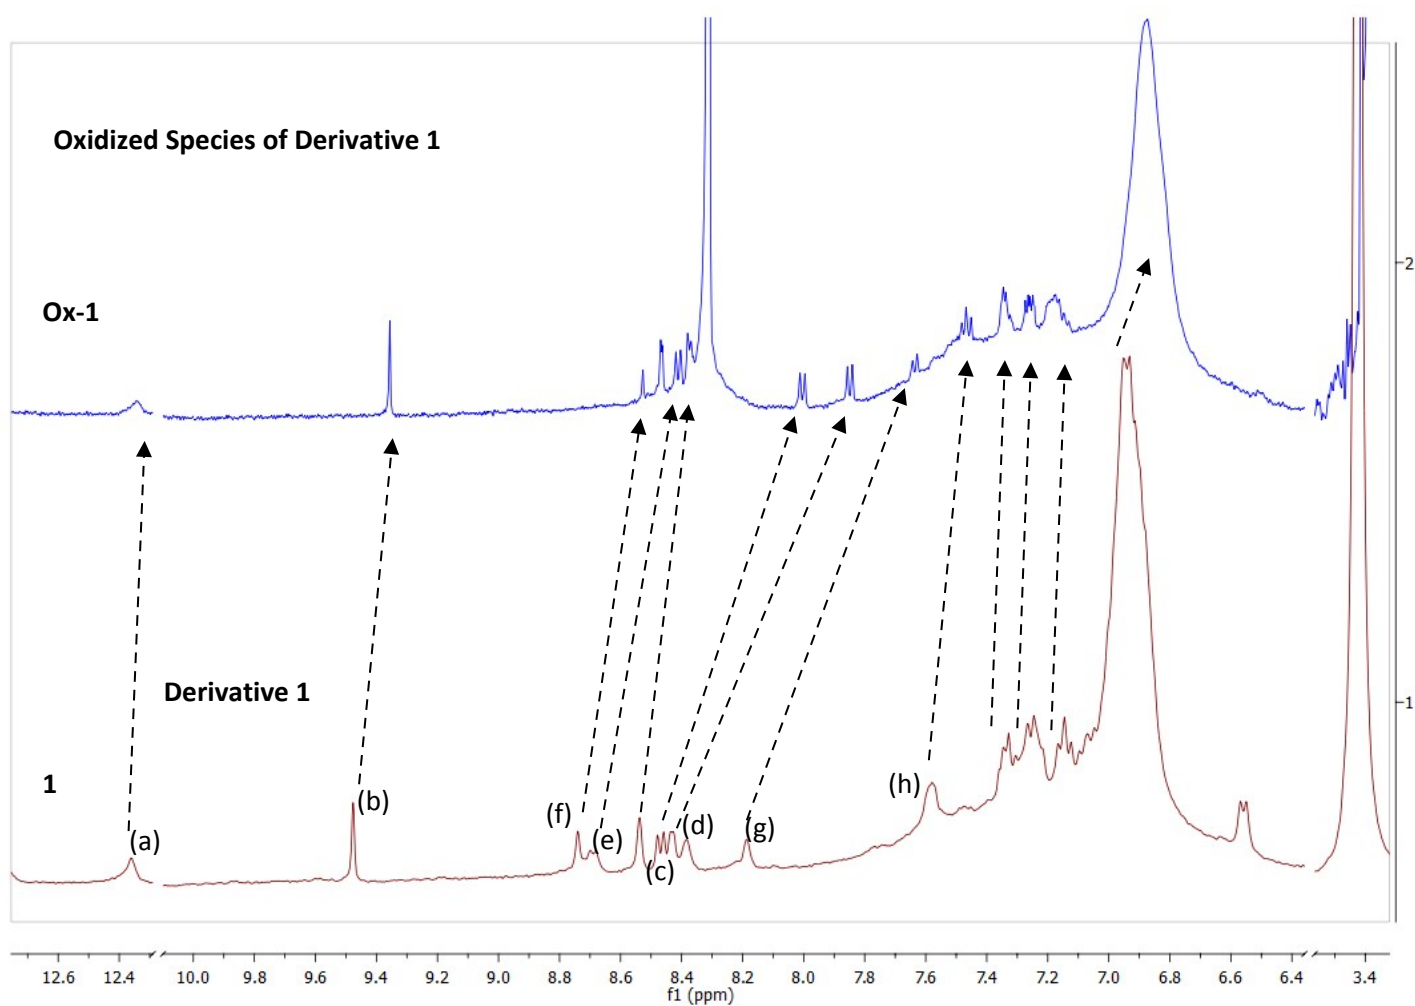

**Figure S6:** Overlay of  $^1\text{H}$  NMR spectra of derivative **1** and oxidized species of derivative **1** showing the upfield shifting of all protons.

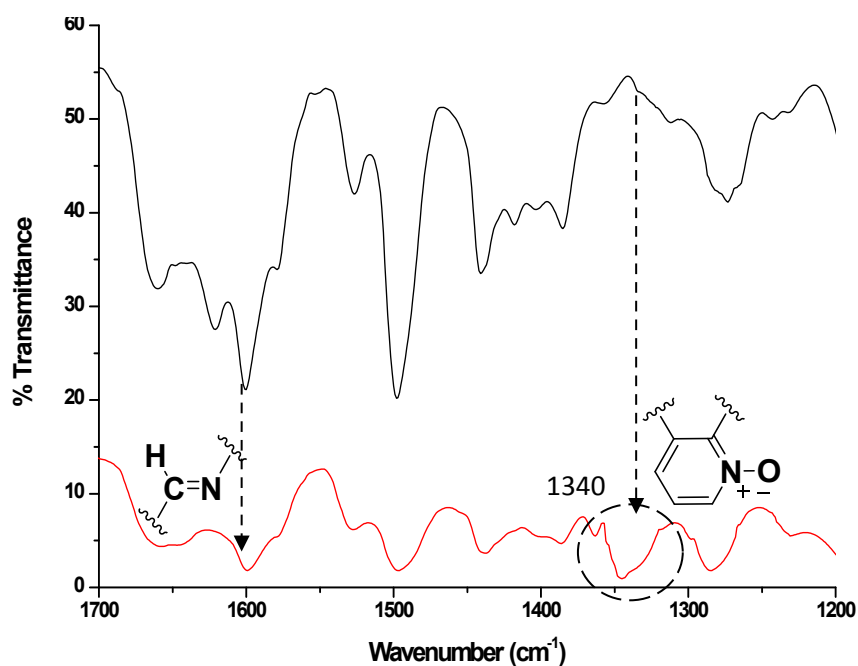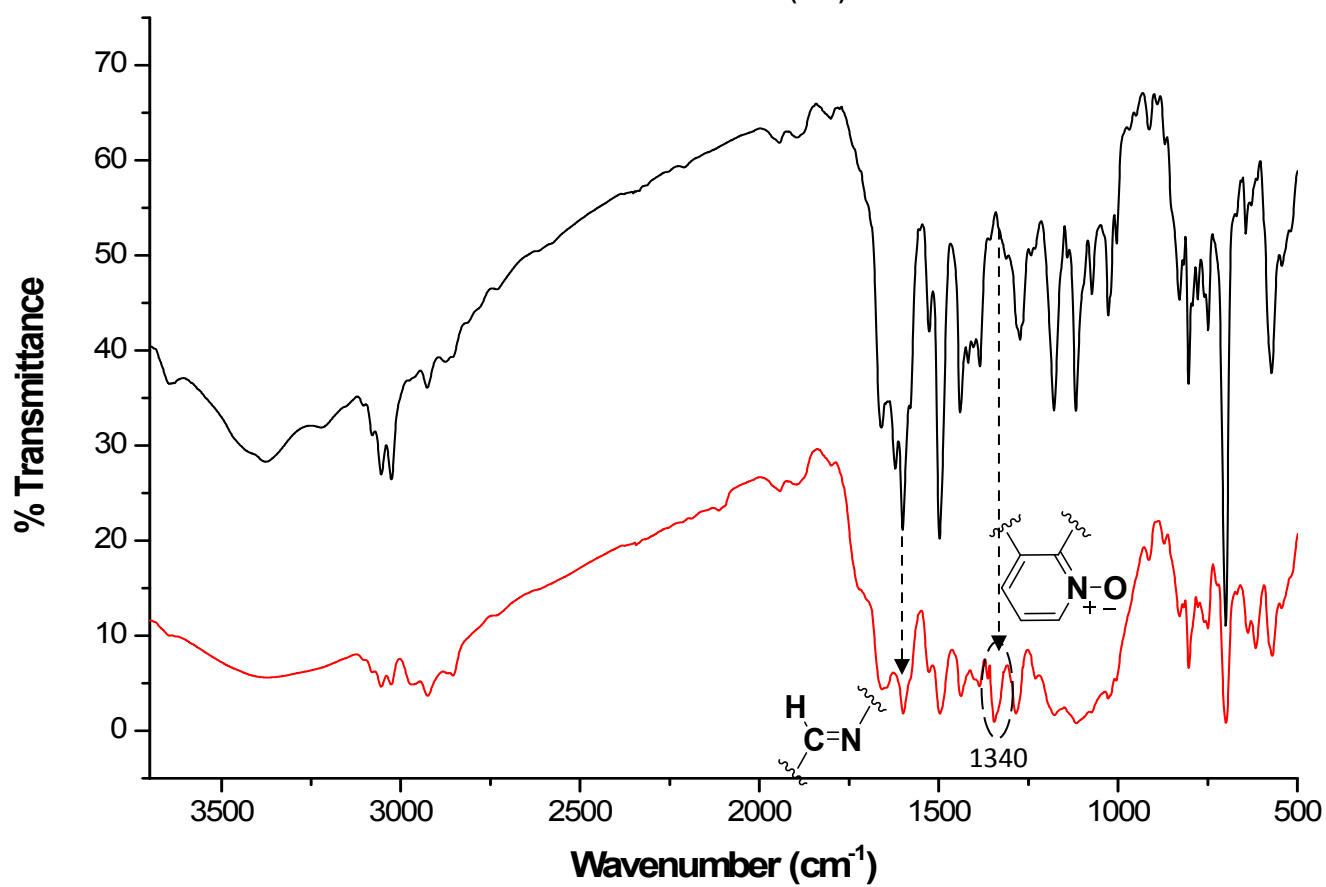

**Figure S7:** FT-IR spectrum of oxidized derivative 1 showed stretching band at around  $1340 \text{ cm}^{-1}$  corresponding to  $\text{N}^+-\text{O}^-$  stretching frequency.

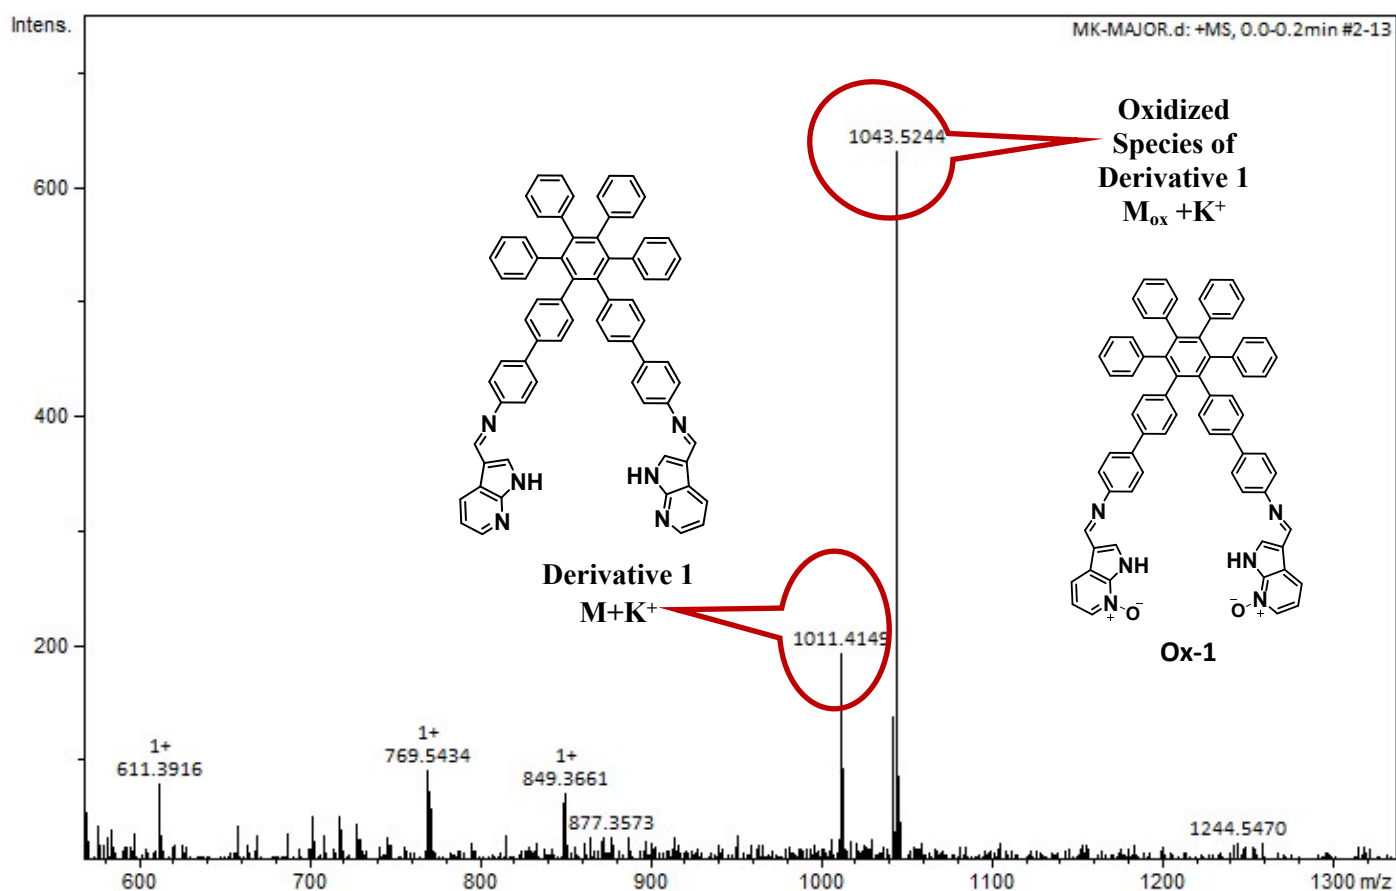

**Figure S8:** ESI-MS mass spectrum of residue obtained showed a parent ion peak,  $m/z = 1043$  due to oxidized species of derivative **1**.

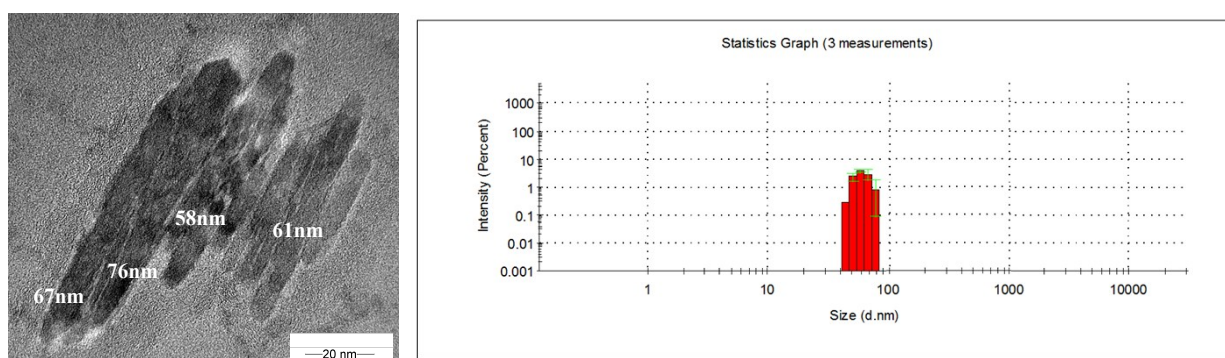

**Figure S9:** (A) TEM (Scale bar 20 nm) and (B) DLS analysis of compound **1** ( $5 \mu\text{M}$ ) showing the size of  $\text{Fe}_2\text{O}_3$  nanoparticles at temperature  $70^\circ\text{C}$  in the range of 60-80 nm.

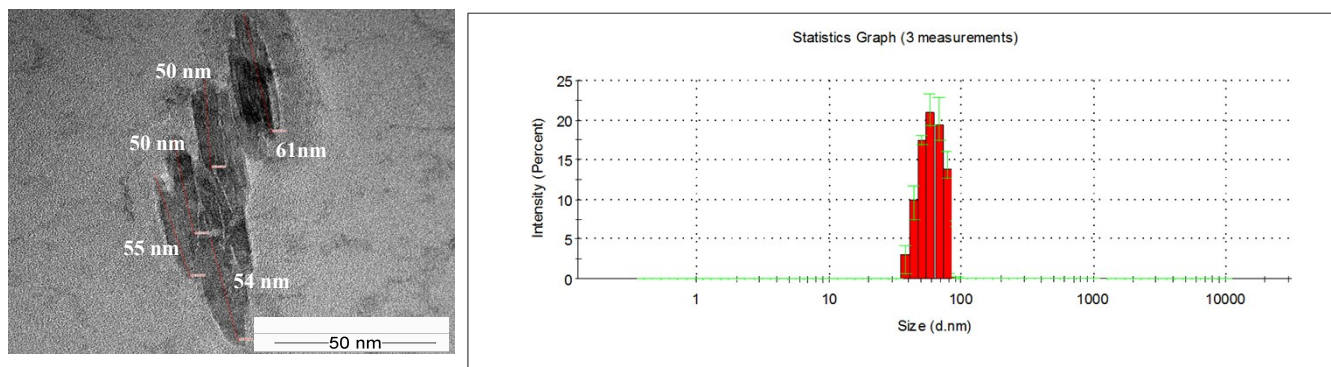

**Figure S10:** (A) TEM (Scale bar 50 nm) and (B) DLS analysis of compound **1** (5  $\mu$ M) showing the size of  $\text{Fe}_2\text{O}_3$  nanoparticles in the presence of sodium hydroxide (pH=12) in the range of 50-60 nm.

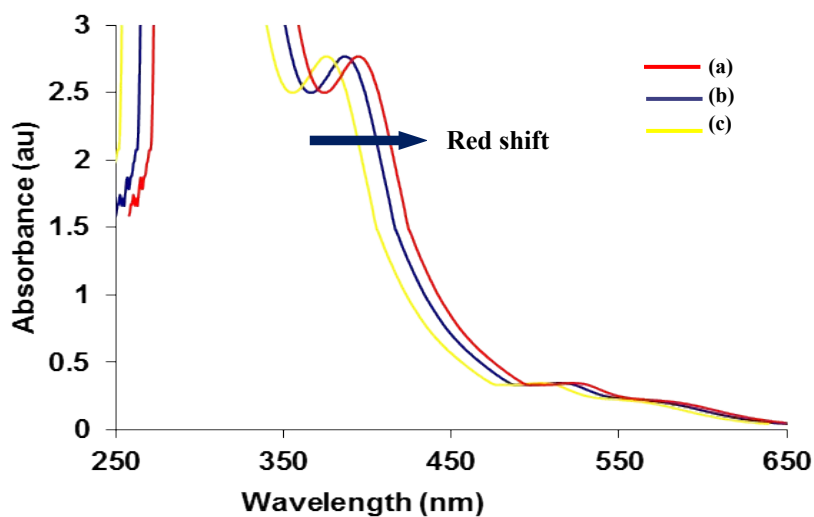

**Figure S11:** UV-vis. spectra by varying  $\text{Fe}^{3+}$  ions to ligand ratio a) 2:1, b) 1:1, c) 1:2.

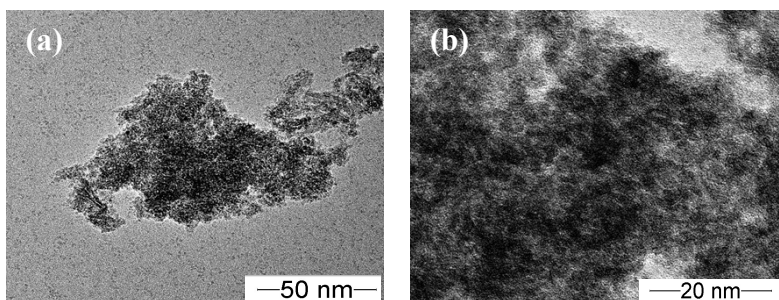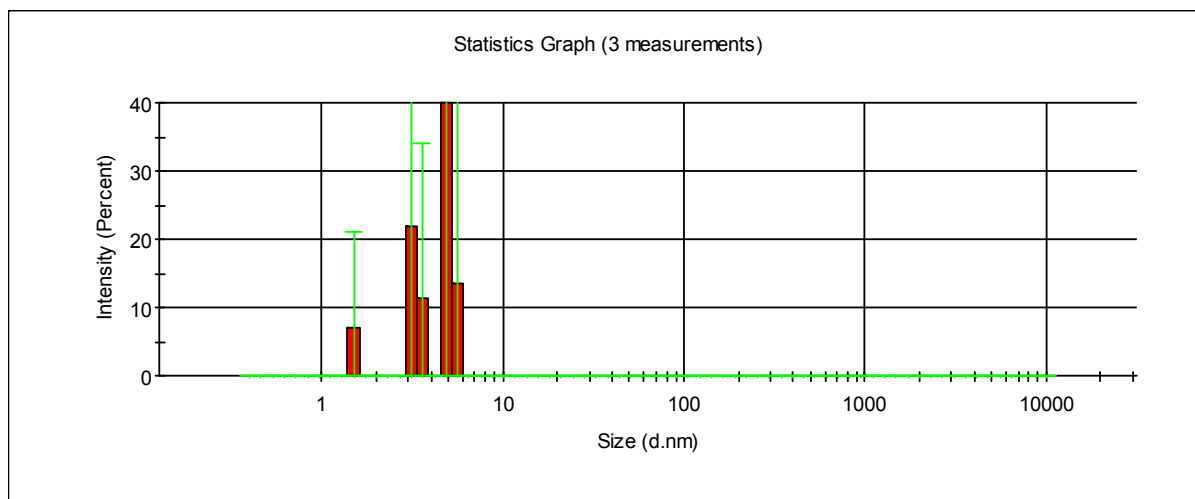

**Figure S12:** A) TEM images of spherical  $\alpha$ -Fe<sub>2</sub>O<sub>3</sub> NPs prepared by literature reported method (*J. Mater. Chem. A*, 2013, **1**, 830) B) DLS analysis showing the size of  $\alpha$ -Fe<sub>2</sub>O<sub>3</sub> NPs 4-6 nm.

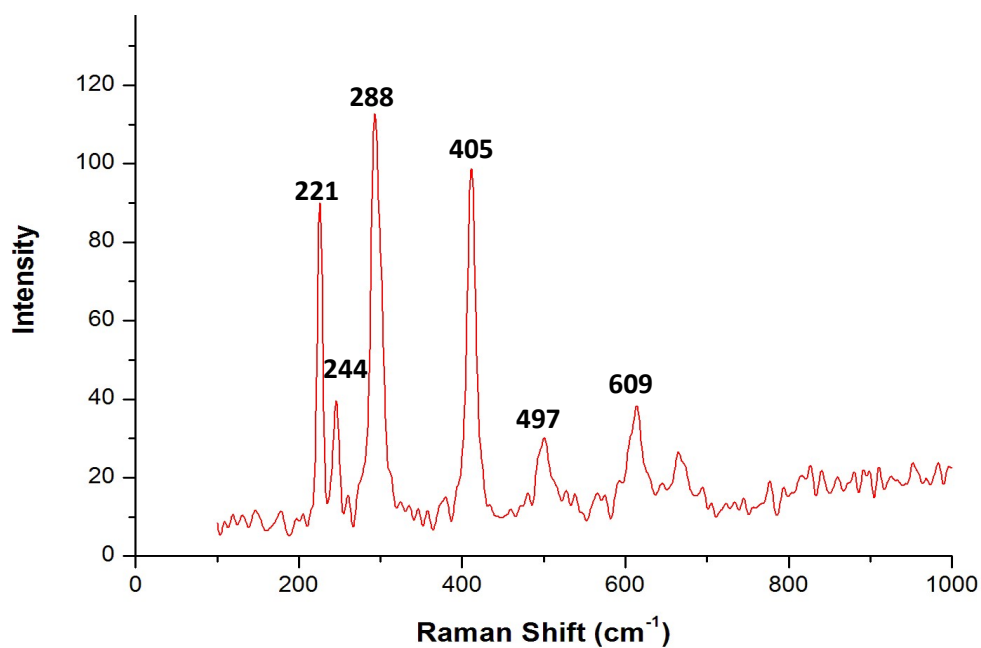

**Figure S13:** Raman spectrum of spherical  $\alpha$ -Fe<sub>2</sub>O<sub>3</sub> NPs prepared by literature reported method (*J. Mater. Chem. A*, 2013, **1**, 830); [Reference 1: *CrystEngComm.*, 2014, **16**, 10618].

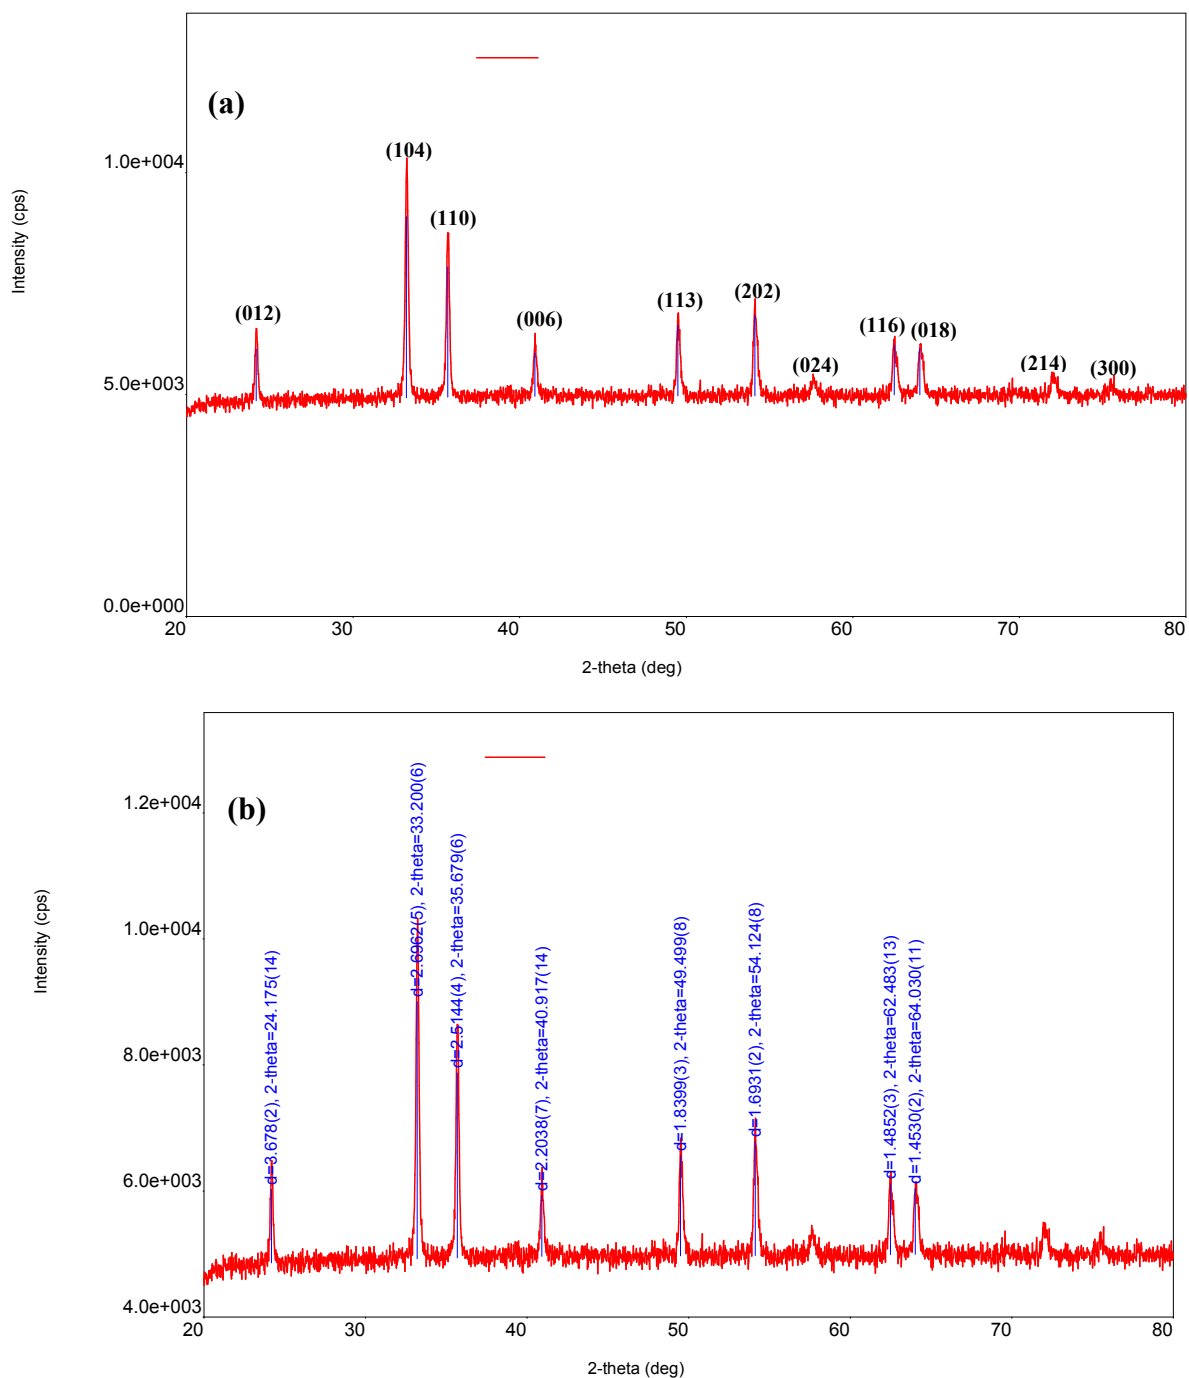

**Figure S14:** (a-b) XRD diffraction pattern of spherical  $\alpha$ -Fe<sub>2</sub>O<sub>3</sub> NPs prepared by commercial reported method.



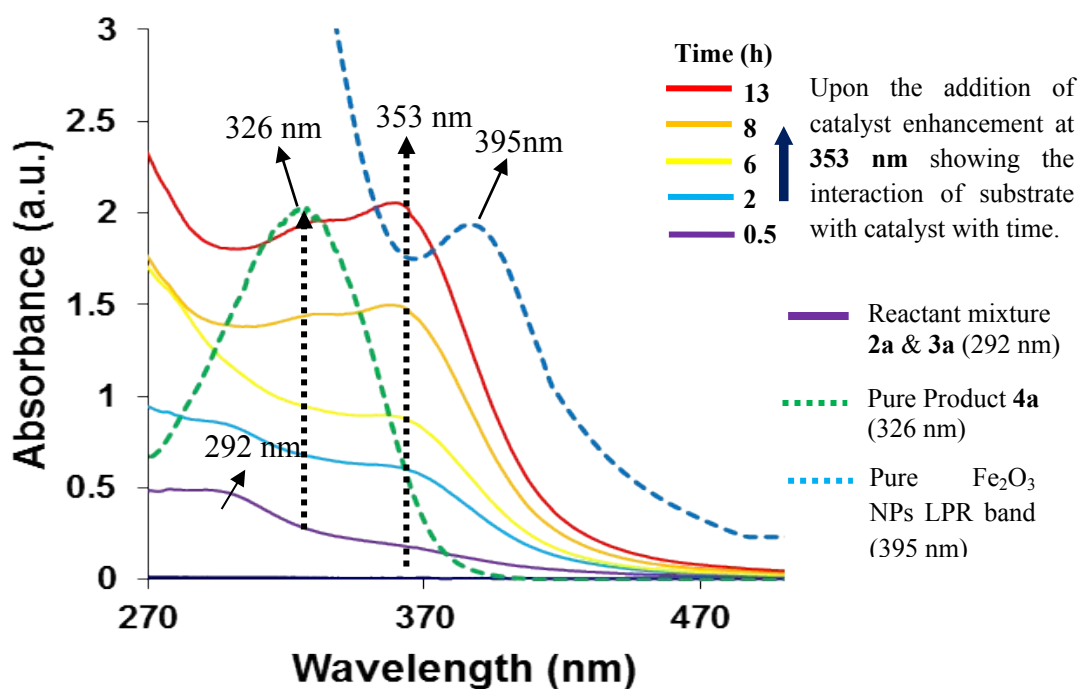

**Figure S15:** UV-vis. Spectra recorded during the reaction of **1a** and **2a** in the presence of in situ generated  $\text{Fe}_2\text{O}_3$  NPs in ethylene glycol.

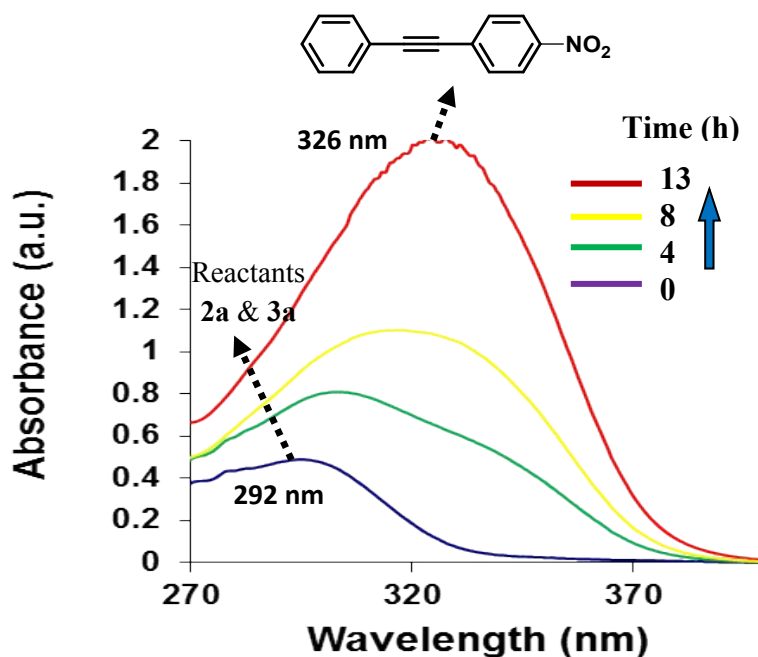

**Figure S16:** UV-vis spectra of reaction between **1a** and **2a** showing the completion of reaction to give product **4a** catalysed by  $\text{Fe}_2\text{O}_3$  NPs when the catalyst loading was 0.005 mol.

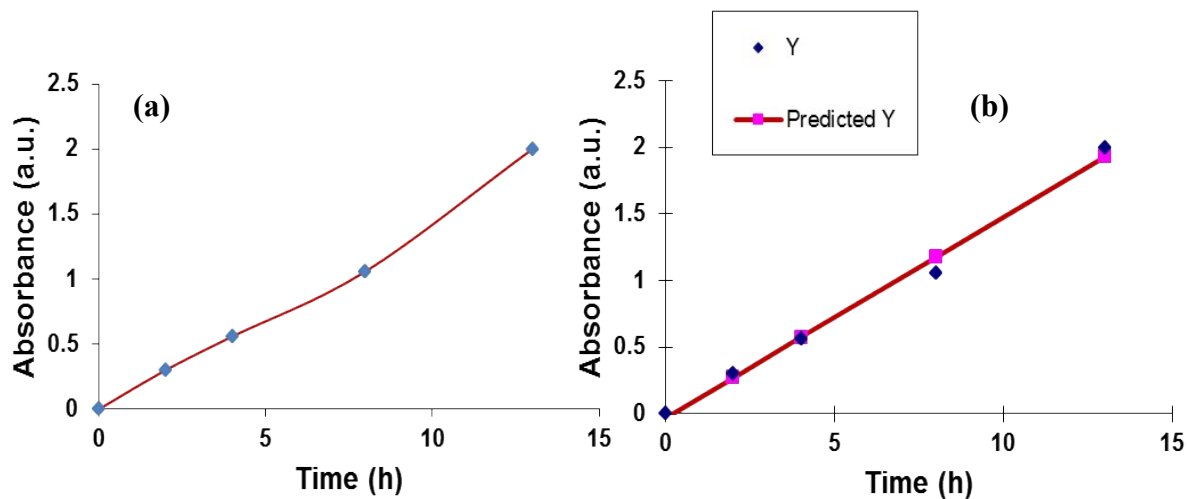

**Figure S17:** (a) Kinetic profile showing the formation of product with time when the catalyst loading is 0.005 mol; (b) calibration curve. Reactions were monitored by UV-vis. Spectroscopy.

Multiple R= 0.995

$R^2 = 0.991$

Slope = 0.150

Rate =  $(2.303 \times 0.150) / 3600 = 0.959 \times 10^{-4} \text{ sec}^{-1}$

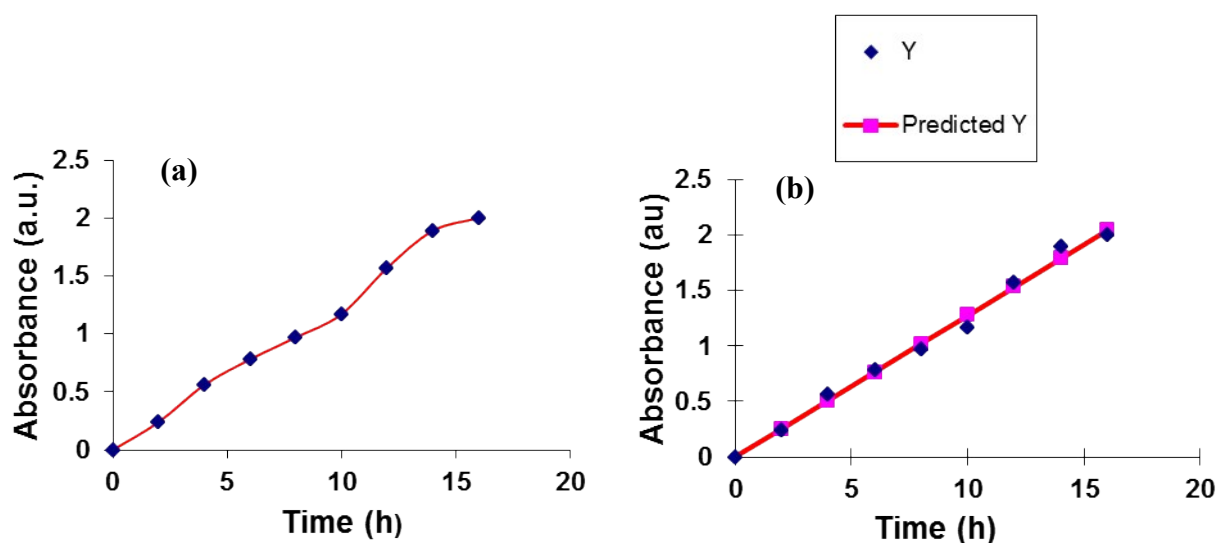

**Figure S18:** (a) Kinetic profile showing the formation of product with time when the catalyst loading is 0.004 mol, (b) calibration curve. Reactions were monitored by UV-vis. Spectroscopy.

Multiple R= 0.996

$R^2 = 0.992$

Slope = 0.128

Rate =  $(2.303 \times 0.128) / 3600 = 0.818 \times 10^{-4} \text{ sec}^{-1}$

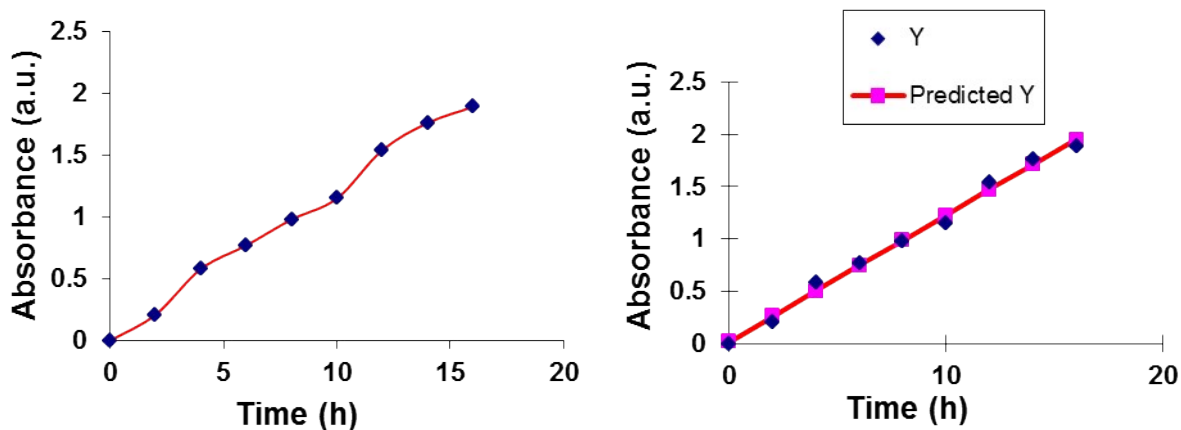

**Figure S19:** (a) Kinetic profile showing the formation of product with time when the catalyst loading is 0.0035 mol, (b) calibration curve. Reactions were monitored by UV-vis. Spectroscopy.

Multiple R= 0.996

$R^2 = 0.992$

Slope = 0.120

Rate =  $(2.303 \times 0.120) / 3600 = 0.767 \times 10^{-4} \text{ sec}^{-1}$

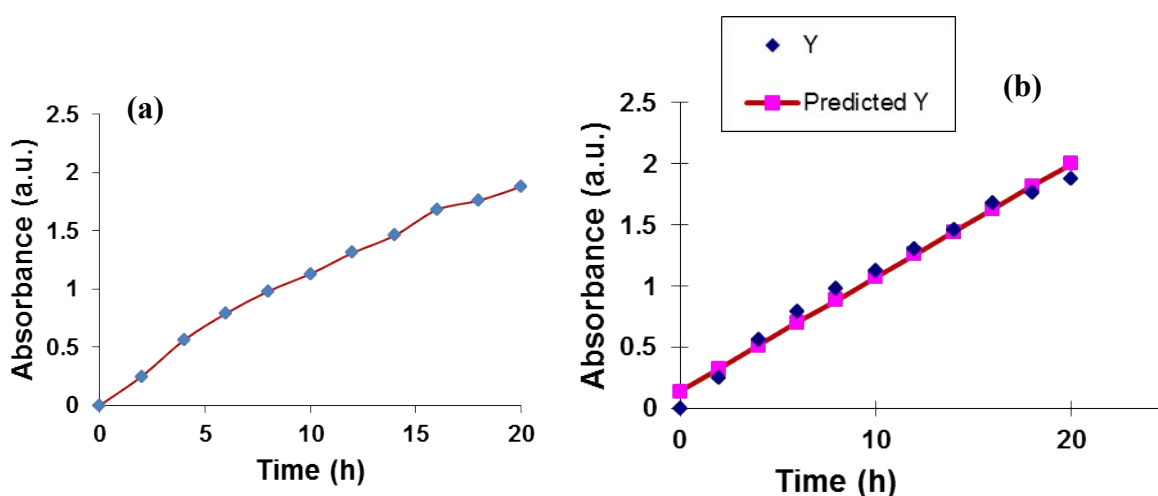

**Figure S20:** (a) Kinetic profile showing the formation of product with time when the catalyst loading is 0.0025 mol, (b) calibration curve. Reactions were monitored by UV-vis. spectroscopy.

Multiple R= 0.9901

$R^2 = 0.981$

Slope = 0.093

Rate =  $(2.303 \times 0.093) / 3600 = 0.59 \times 10^{-4} \text{ sec}^{-1}$

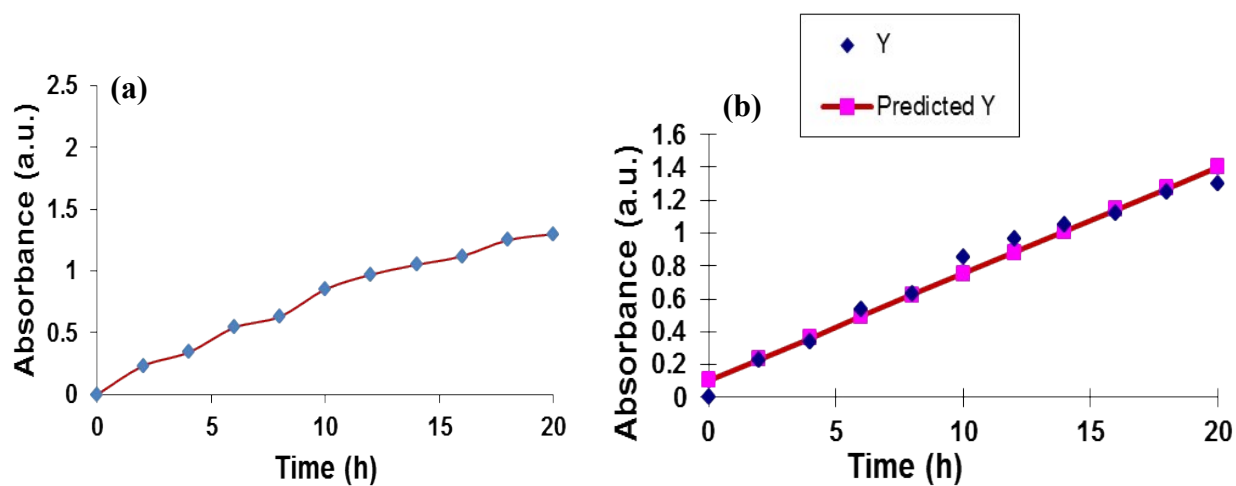

**Figure S21:** (a) Kinetic profile showing the formation of product with time when the catalyst loading is 0.0015 mol, (b) calibration curve. Reactions were monitored by UV-vis. Spectroscopy.

Multiple R= 0.988

$R^2 = 0.977$

Slope = 0.064

Rate =  $(2.303 \times 0.064) / 3600 = 0.409 \times 10^{-4} \text{ sec}^{-1}$

(a) Sonogashira cross coupling reaction

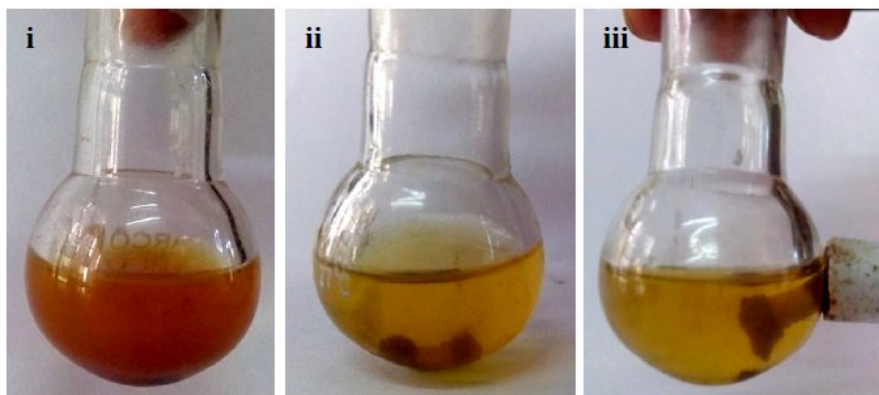

(a) Hetero-Diels-Alder reaction

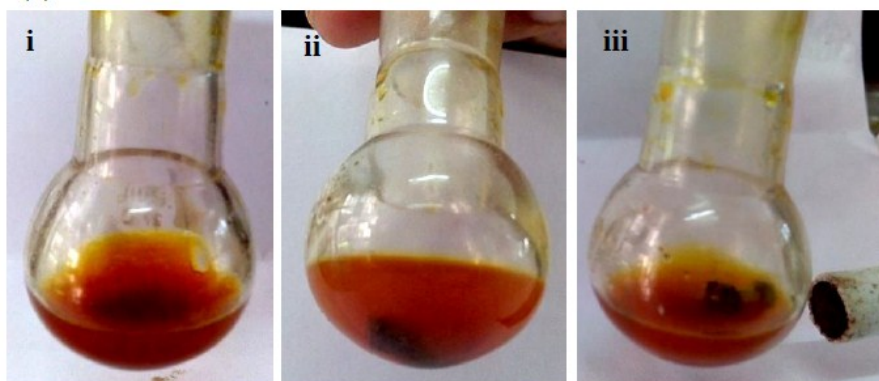

**Figure S22:**  $\alpha$ - $\text{Fe}_2\text{O}_3$  nanoparticles (a) for Sonogashira cross coupling reaction i) dispersed in the reaction mixture, ii) adsorbed on a magnetic stirring bar, iii) an external magnet attracted stirring bar and  $\alpha$ - $\text{Fe}_2\text{O}_3$  nanoparticles; (b) for Hetero-Diels-Alder reaction i) dispersed in the reaction mixture, ii) adsorbed on a magnetic stirring bar, iii) an external magnet attracted stirring bar and  $\alpha$ - $\text{Fe}_2\text{O}_3$  nanoparticles.

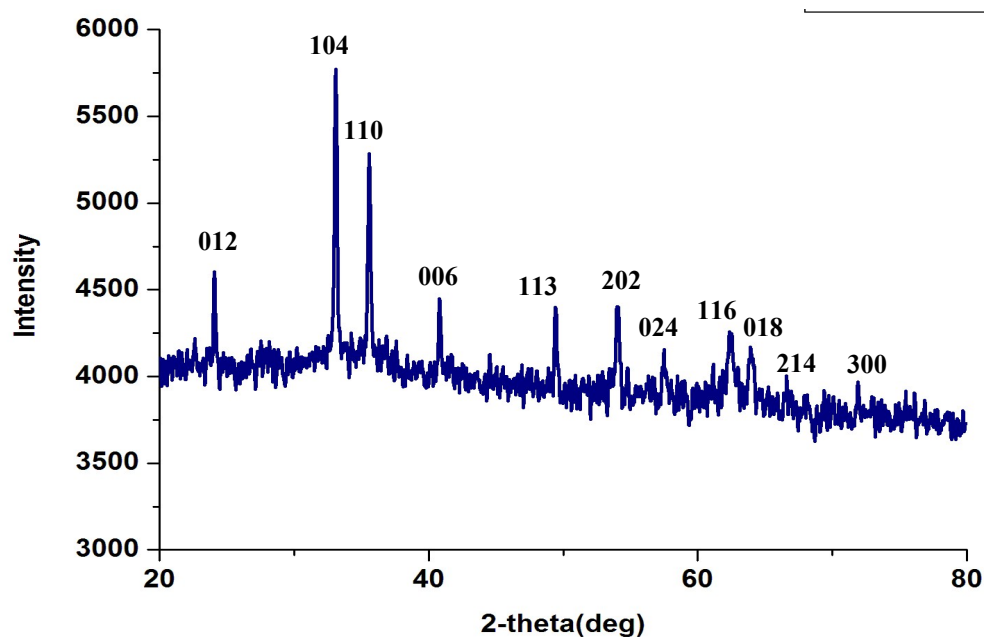

**Figure S23:** XRD of *in situ* generated rod like  $\alpha$ -Fe<sub>2</sub>O<sub>3</sub> NPs separated after 13 cycles recycling.

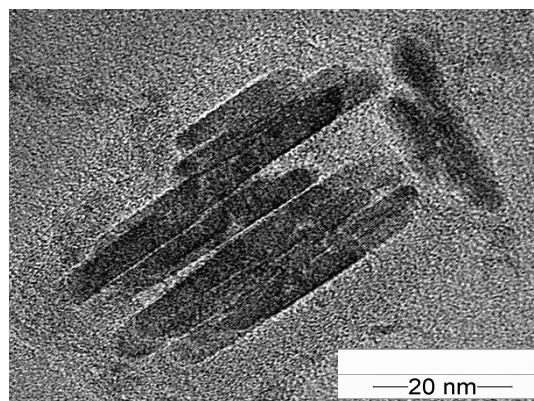

**Figure S24:** TEM image of *in situ* generated rod like  $\alpha$ -Fe<sub>2</sub>O<sub>3</sub> NPs separated after 13 cycles.

**Analyst**  
**Date Started** 12:44 21-08-2015 GMT: 07:14 21-08-2015  
**Worksheet** fe210815  
**Comment**  
**Methods** Fe  
**Computer name** HP-PC  
**Serial Number:**

## Method: Fe (Flame)

| Sample ID  | Conc mg/L | %RSD    | SD      | Mean Abs   | BG Abs   |
|------------|-----------|---------|---------|------------|----------|
| CAL ZERO   | 0.000     | 62.8    | 0.0006  | -0.0009    | 0.0010   |
|            | Readings  |         |         |            |          |
|            | -0.0015   | -0.0005 | -0.0007 | 21-08-2015 | 12:49:34 |
|            | ISF       |         |         |            |          |
|            | 1.0000    |         |         |            |          |
| STANDARD 1 | 5.000     | 1.9     | 0.0055  | 0.2947     | 0.0010   |
|            | Readings  |         |         |            |          |
|            | 0.2886    | 0.2963  | 0.2993  | 21-08-2015 | 12:50:14 |
|            | ISF       |         |         |            |          |
|            | 1.0000    |         |         |            |          |
| STANDARD 2 | 10.000    | 0.4     | 0.0022  | 0.5006     | 0.0027   |
|            | Readings  |         |         |            |          |
|            | 0.5022    | 0.4981  | 0.5016  | 21-08-2015 | 12:50:48 |
|            | ISF       |         |         |            |          |
|            | 1.0000    |         |         |            |          |
| STANDARD 3 | 15.000    | 1.0     | 0.0066  | 0.6595     | 0.0044   |
|            | Readings  |         |         |            |          |
|            | 0.6563    | 0.6552  | 0.6671  | 21-08-2015 | 12:51:16 |
| Sample 001 | 1.0000    |         |         |            |          |
|            | 0.166     | 2.7     | 0.0003  | 0.0098     | 0.0418   |
|            | Readings  |         |         |            |          |
|            | 0.0098    | 0.0096  | 0.0101  | 21-08-2015 | 12:57:40 |
|            | ISF       |         |         |            |          |
|            | 1.0000    |         |         |            |          |

**Figure S25:** Atomic Absorption Studies (AAS) of the residual liquid left after the magnetic separation of catalyst and found that only 0.166 mg/lit = 0.166 ppm of iron leached into the solution.

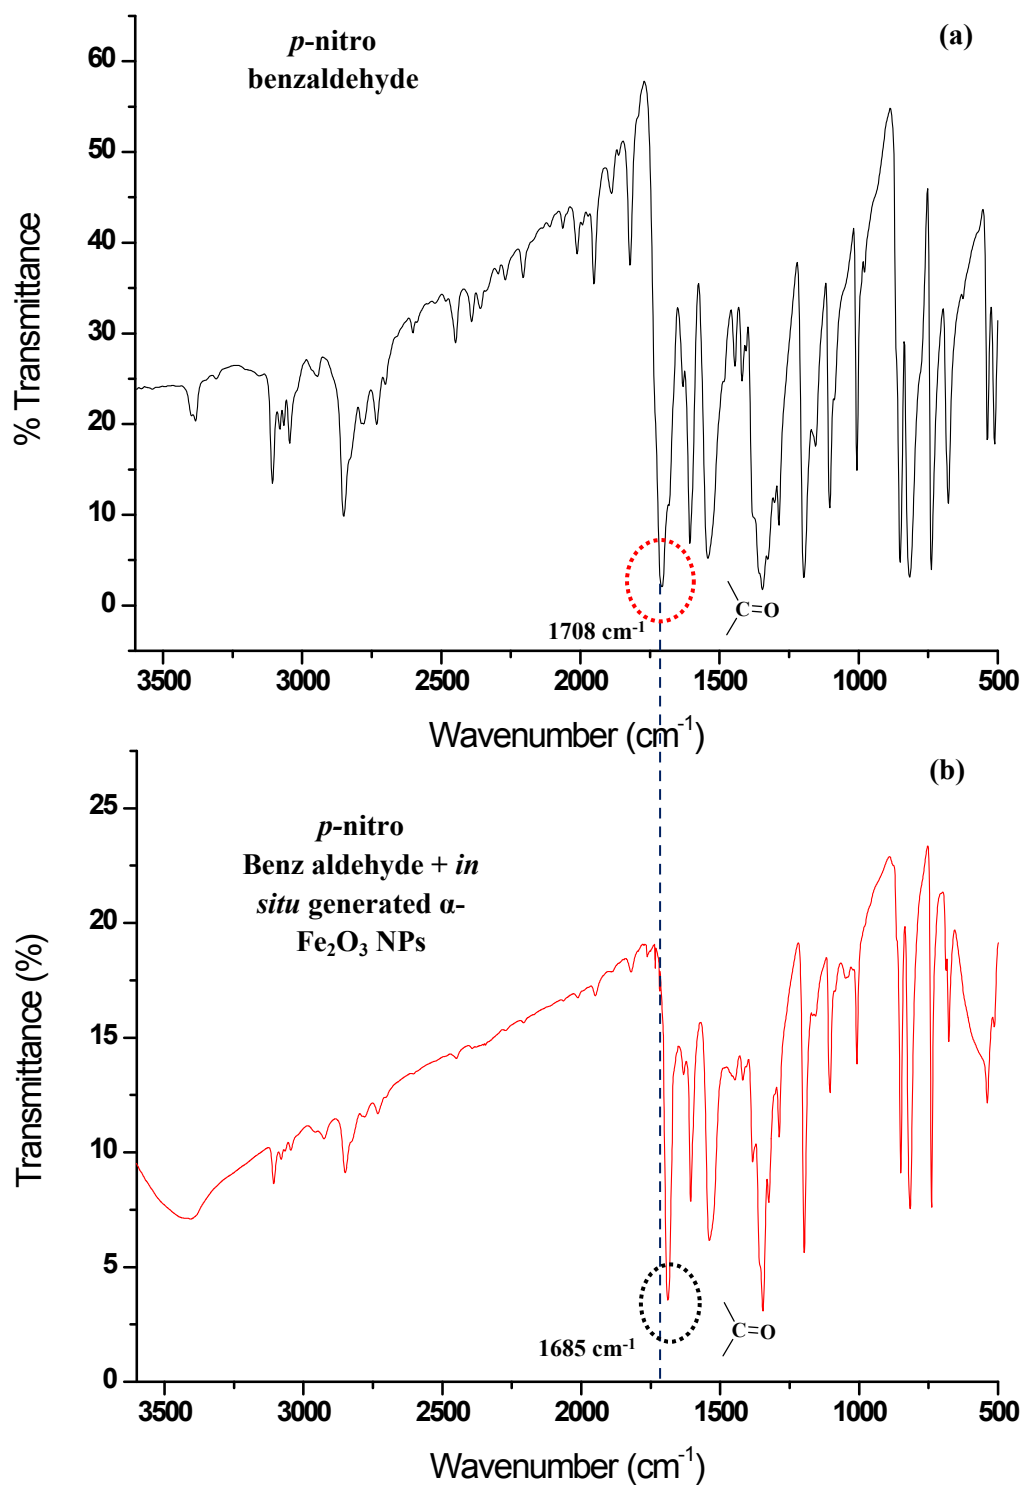

**Figure S26:** IR spectra of (a) *p*-nitrobenzaldehyde; (b) separated reaction mixture containing *p*-nitrobenzaldehyde and  $\alpha$ - $\text{Fe}_2\text{O}_3$  NPs.



Fig. S27A:  $^1\text{H}$  NMR Spectra ( $\text{CDCl}_3$ , 500 MHz, ppm) of compound 4a:

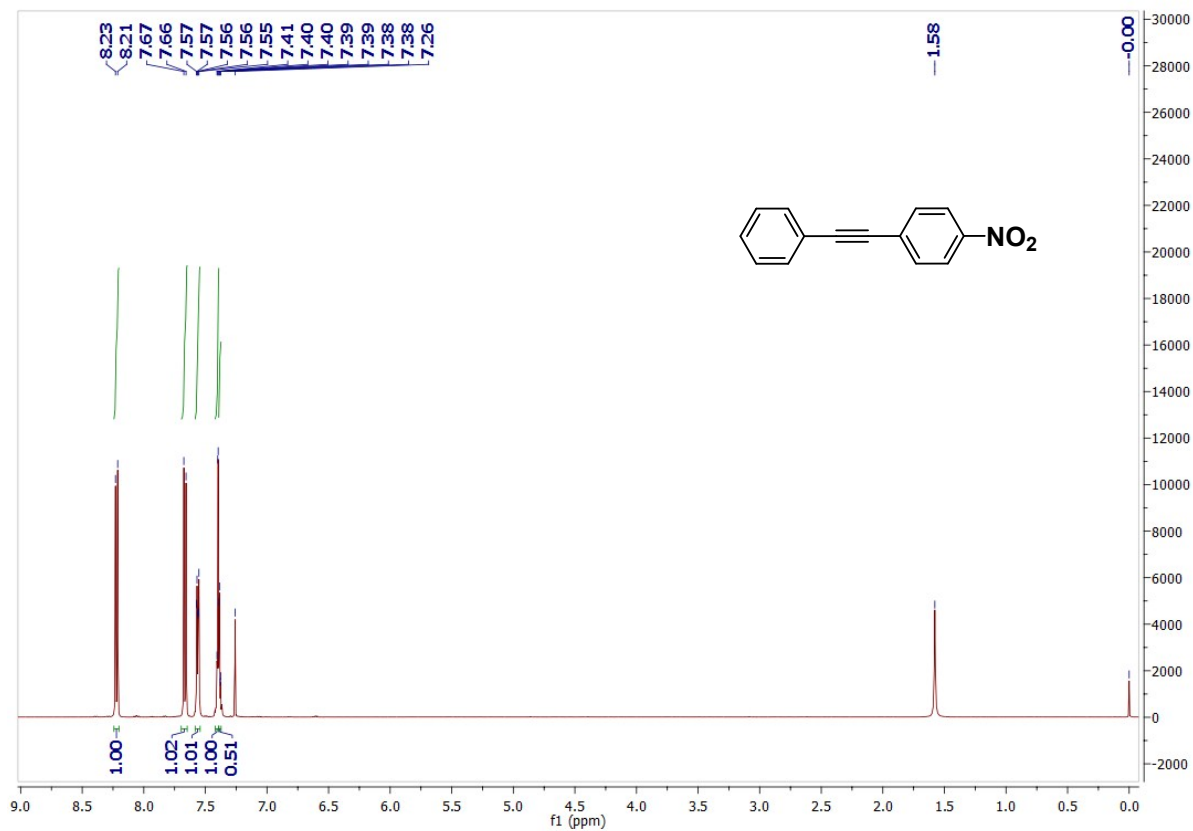

Fig. S27B:  $^{13}\text{C}$  NMR Spectra ( $\text{CDCl}_3$ , 125 MHz, ppm) of compound 4a:

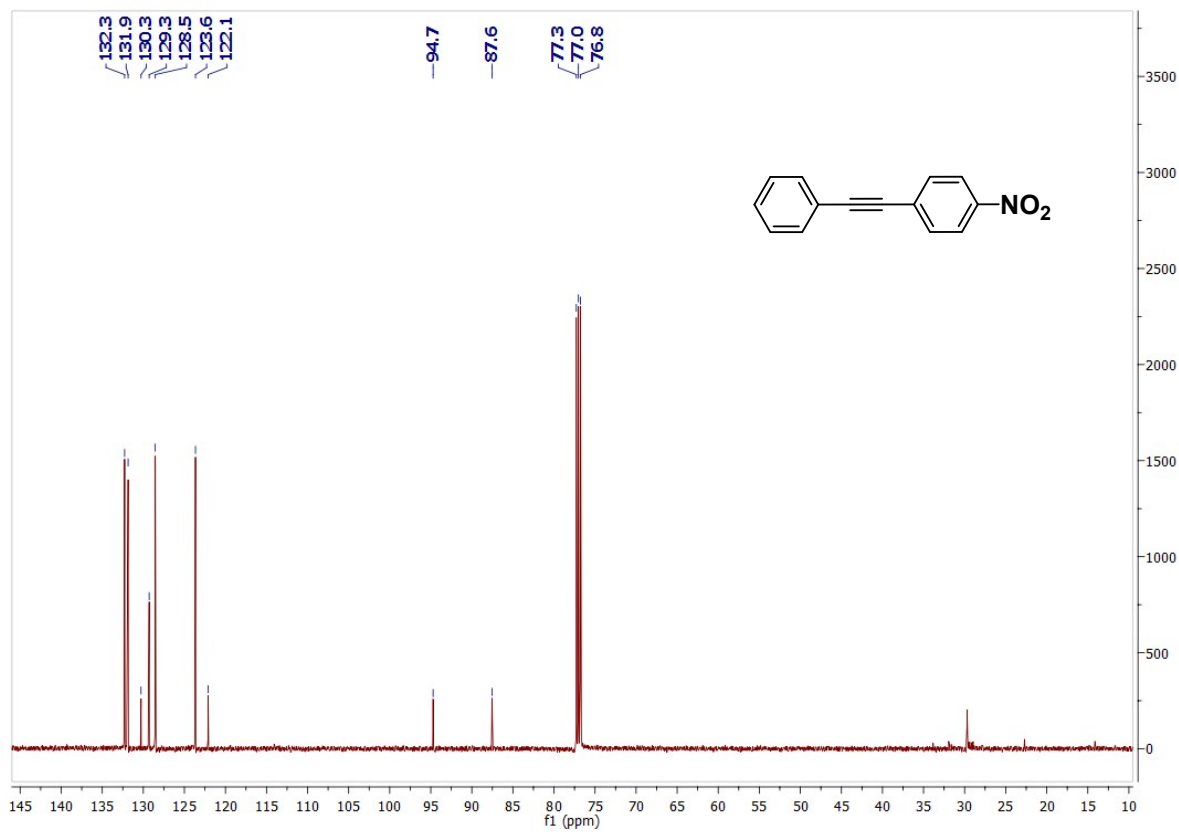

Fig. S28A: <sup>1</sup>H NMR Spectra (CDCl<sub>3</sub>, 500 MHz, ppm) of compound 4b & 4c:

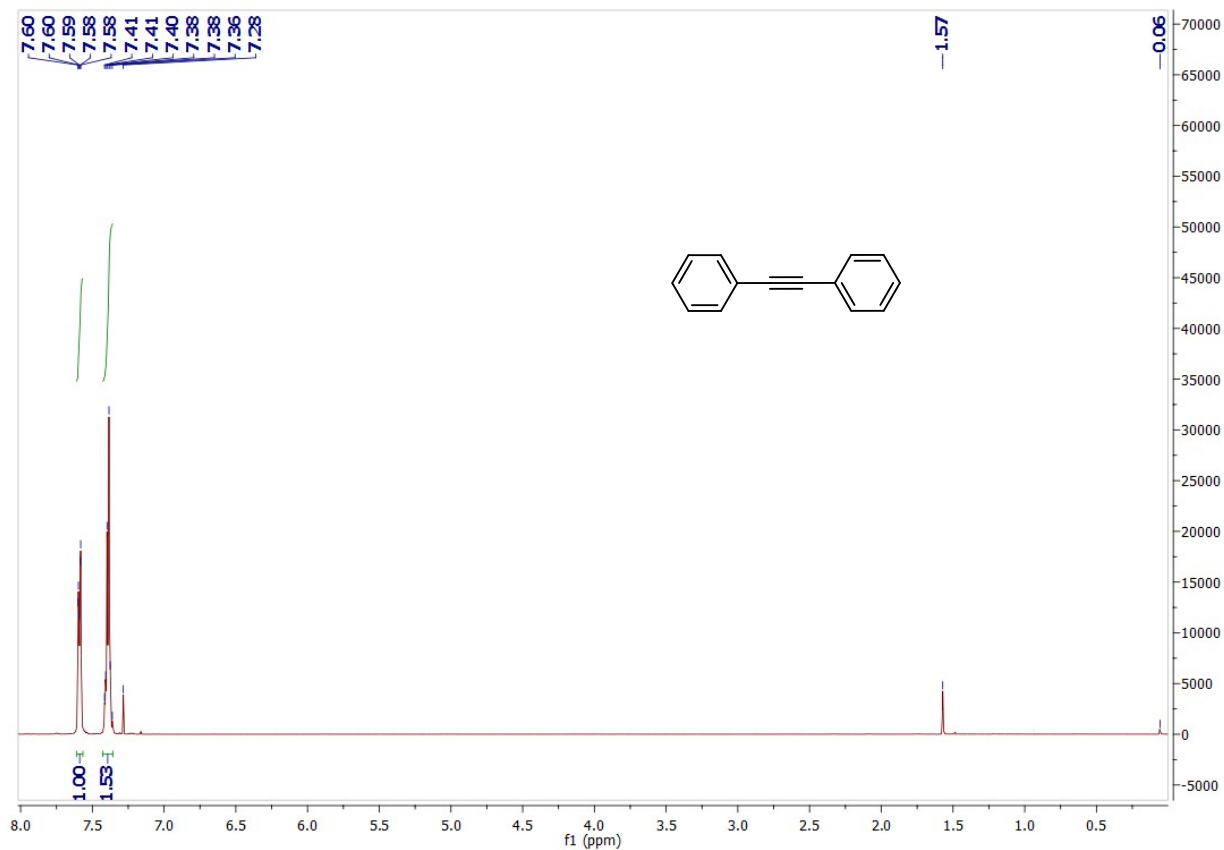

Fig. S28B: <sup>13</sup>C NMR Spectra (CDCl<sub>3</sub>, 125 MHz, ppm) of compound 4b & 4c:

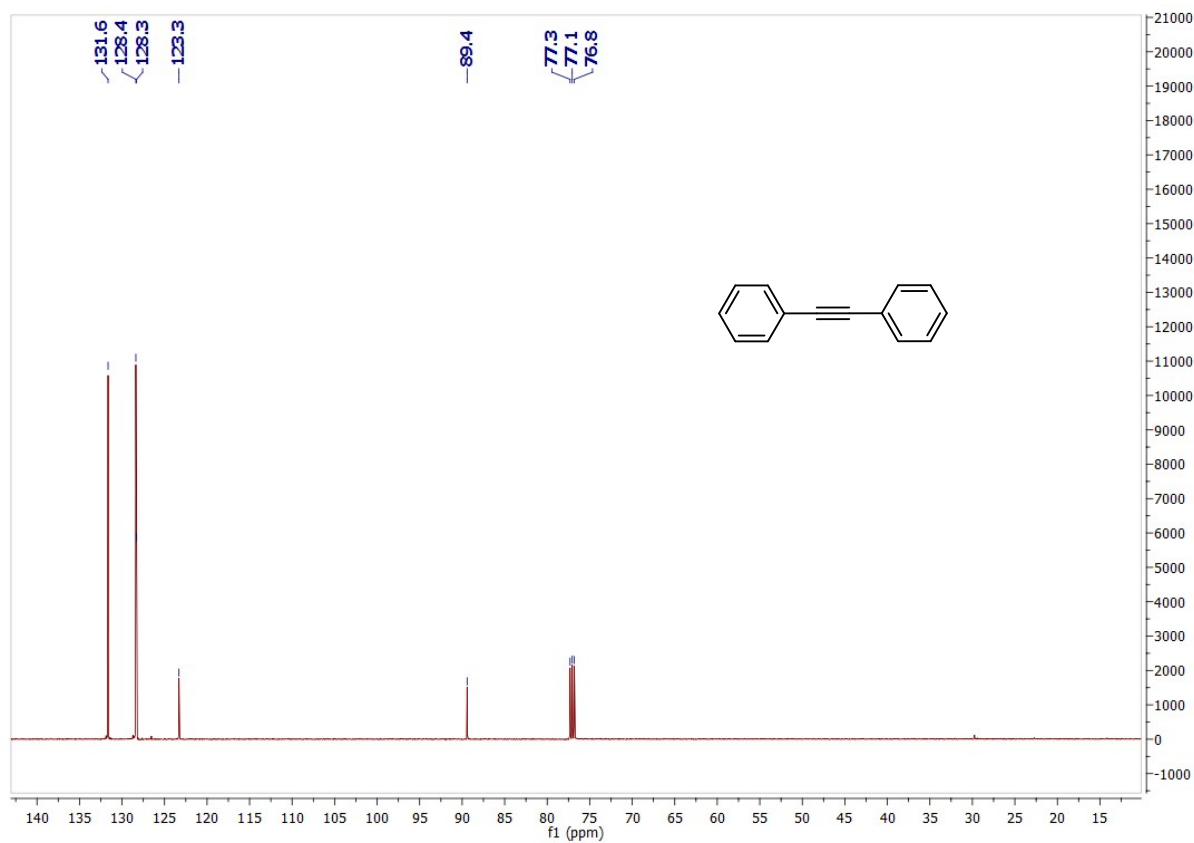

Fig. S29A: <sup>1</sup>H NMR Spectra (CDCl<sub>3</sub>, 500 MHz, ppm) of compound 4d:

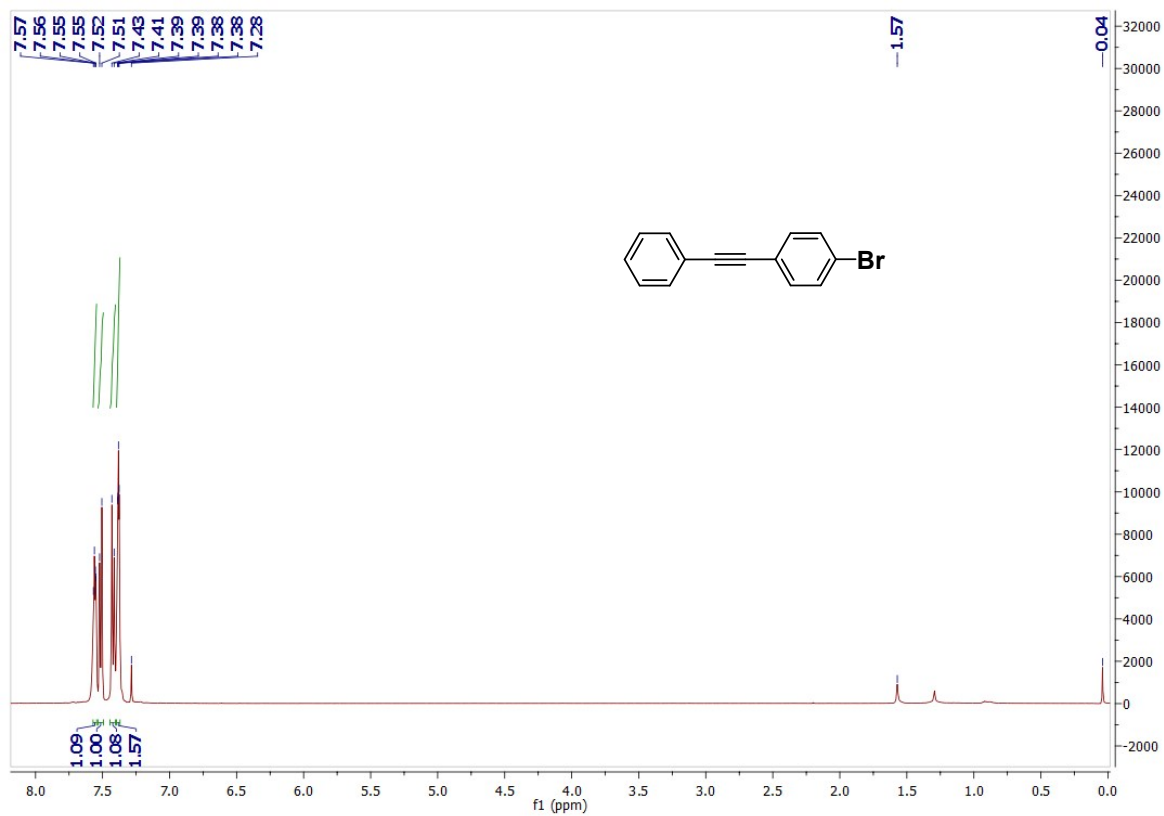

Fig. S29B: <sup>13</sup>C NMR Spectra (CDCl<sub>3</sub>, 125 MHz, ppm) of compound 4d:

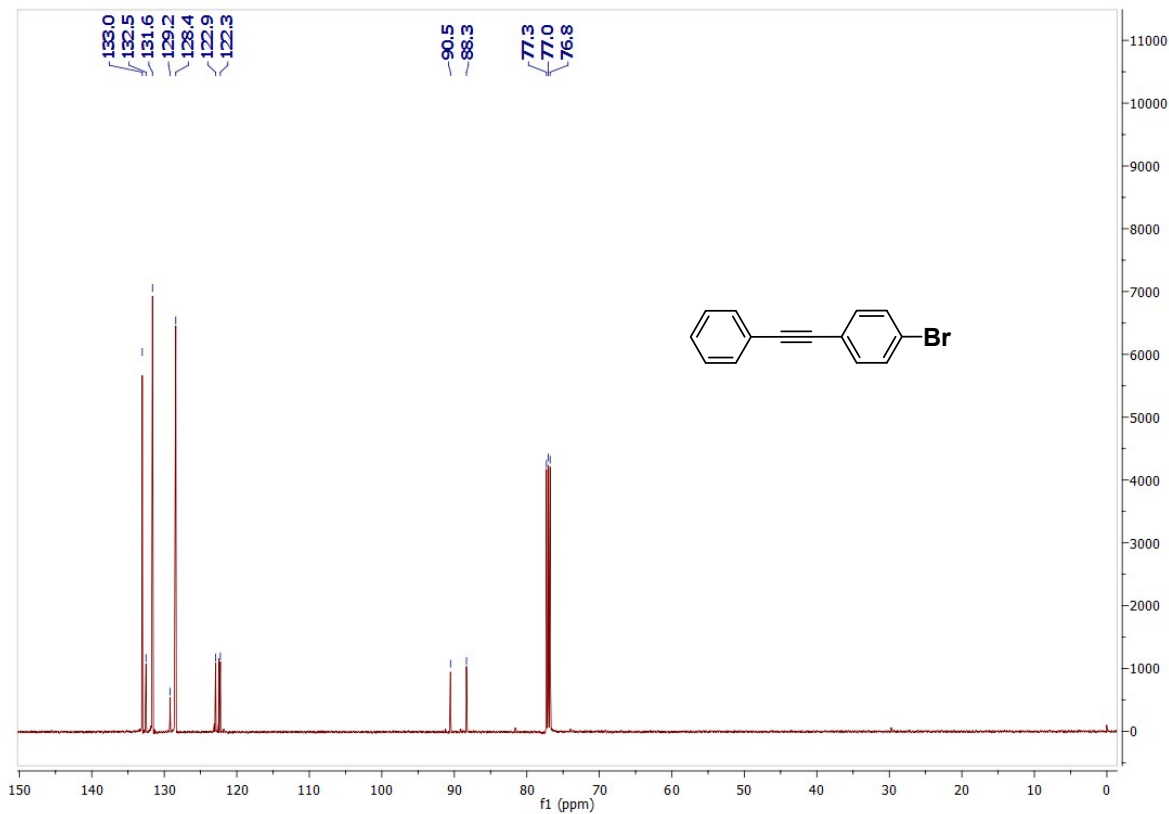

Fig. S30A:  $^1\text{H}$  NMR Spectra ( $\text{CDCl}_3$ , 300 MHz, ppm) of compound 4e:

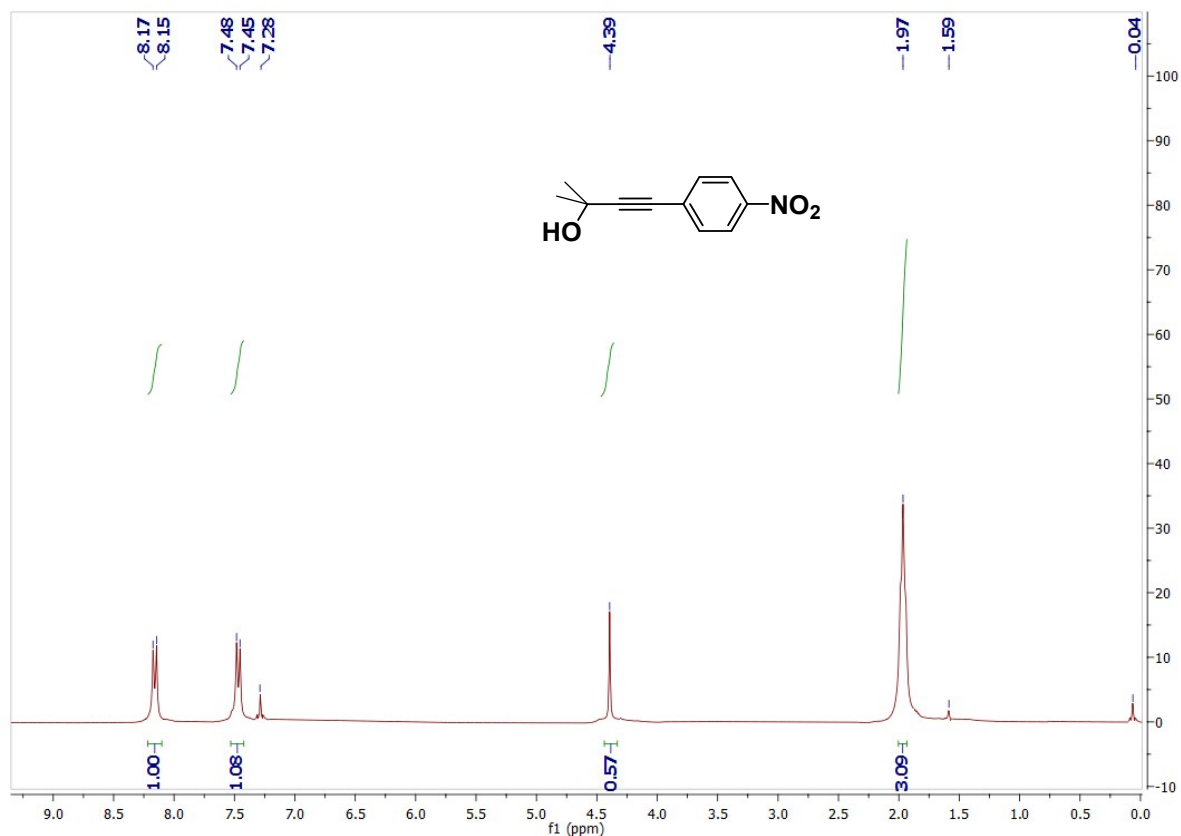

Fig. S30B:  $^{13}\text{C}$  NMR Spectra ( $\text{CDCl}_3$ , 75 MHz, ppm) of compound 4e:

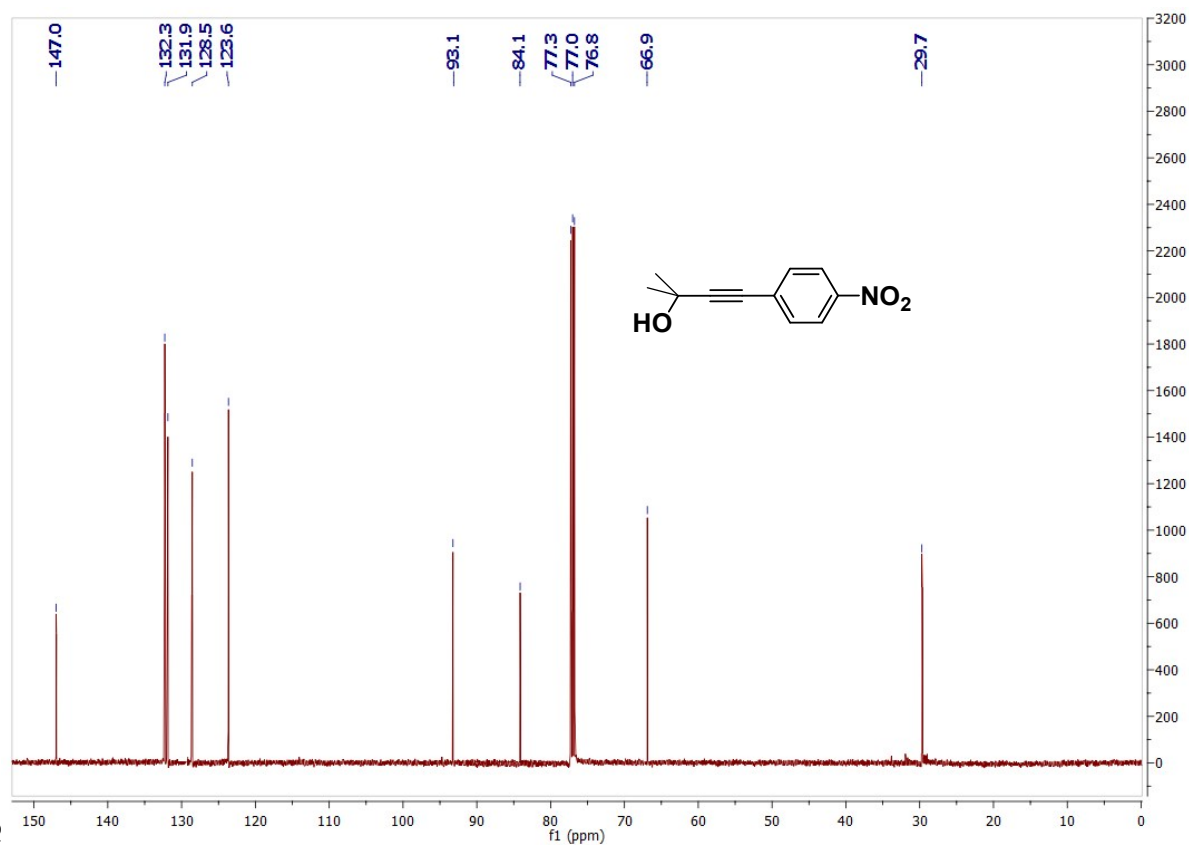

Fig. S31A: <sup>1</sup>H NMR Spectra (CDCl<sub>3</sub>, 300 MHz, ppm) of compound 4f:

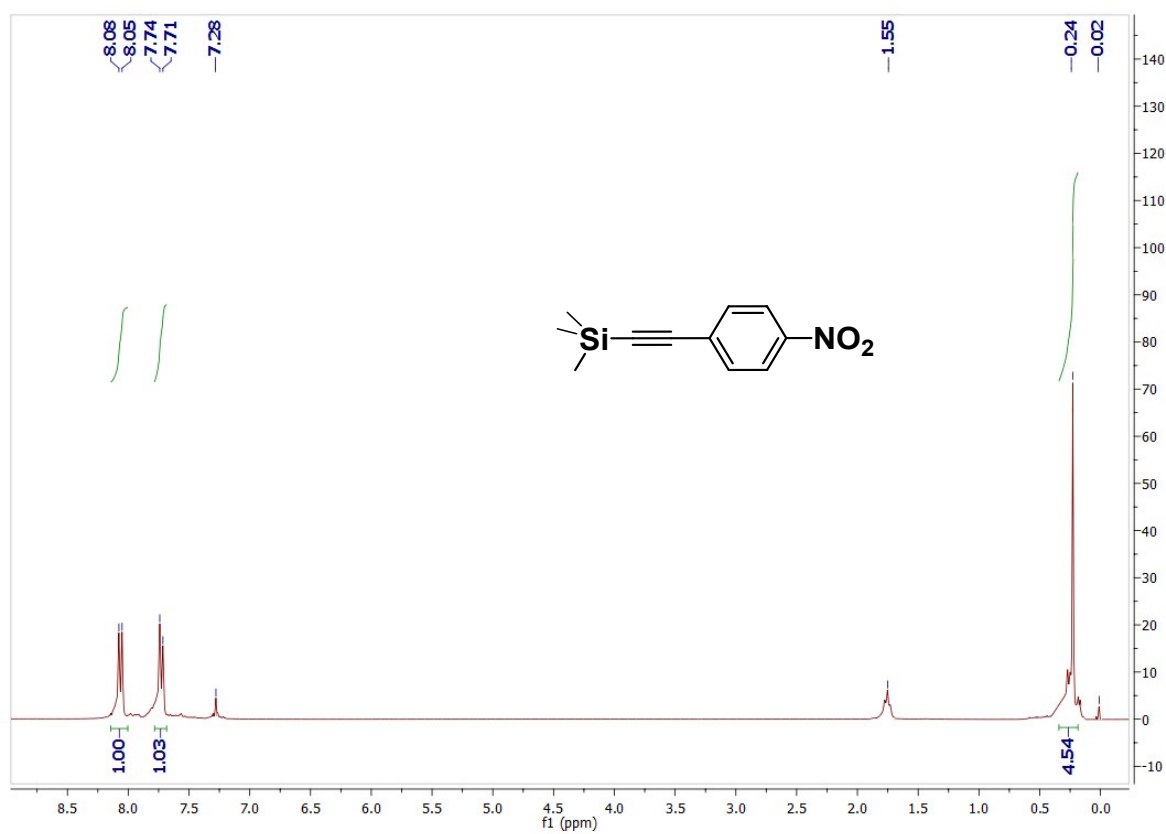

Fig. S31B: <sup>13</sup>C NMR Spectra (CDCl<sub>3</sub>, 75 MHz, ppm) of compound 4f:

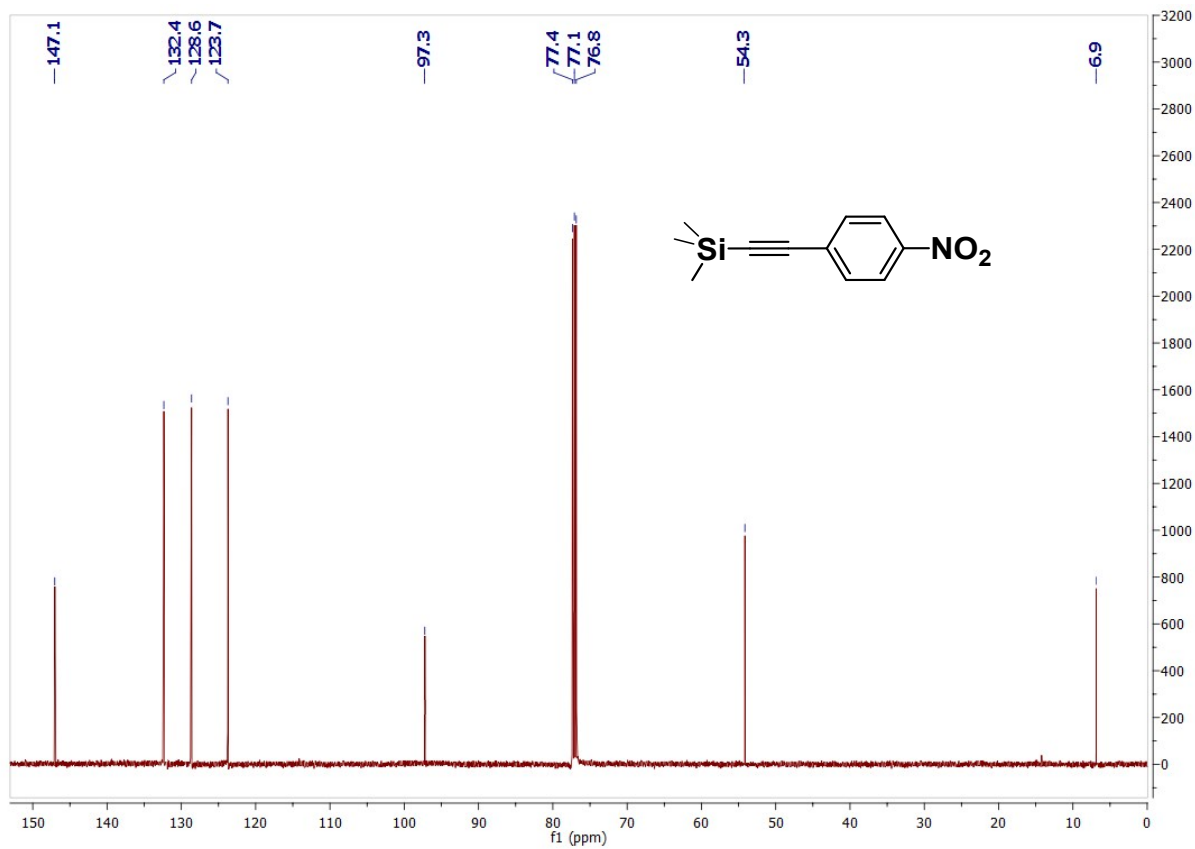

Fig. S32A: <sup>1</sup>H NMR Spectra (CDCl<sub>3</sub>, 500 MHz, ppm) of compound 4g:

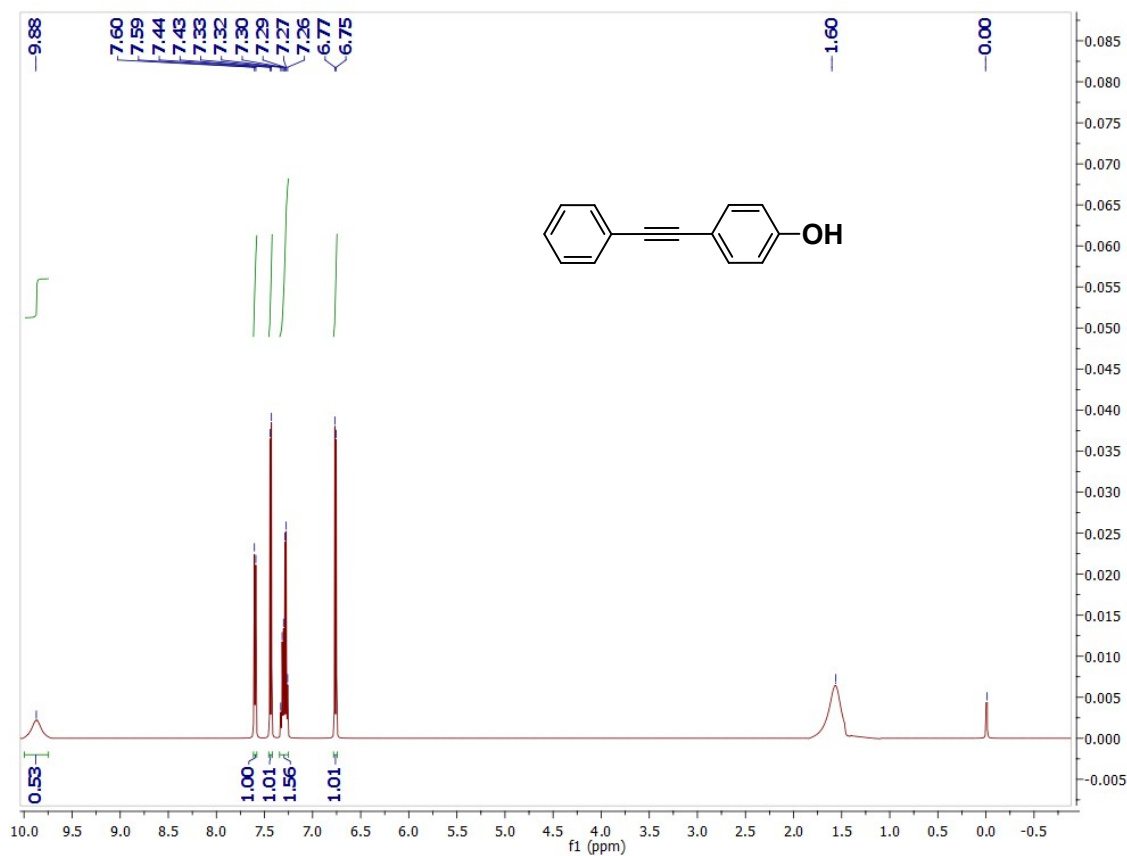

Fig. S32B: <sup>13</sup>C NMR Spectra (CDCl<sub>3</sub>, 125 MHz, ppm) of compound 4g:

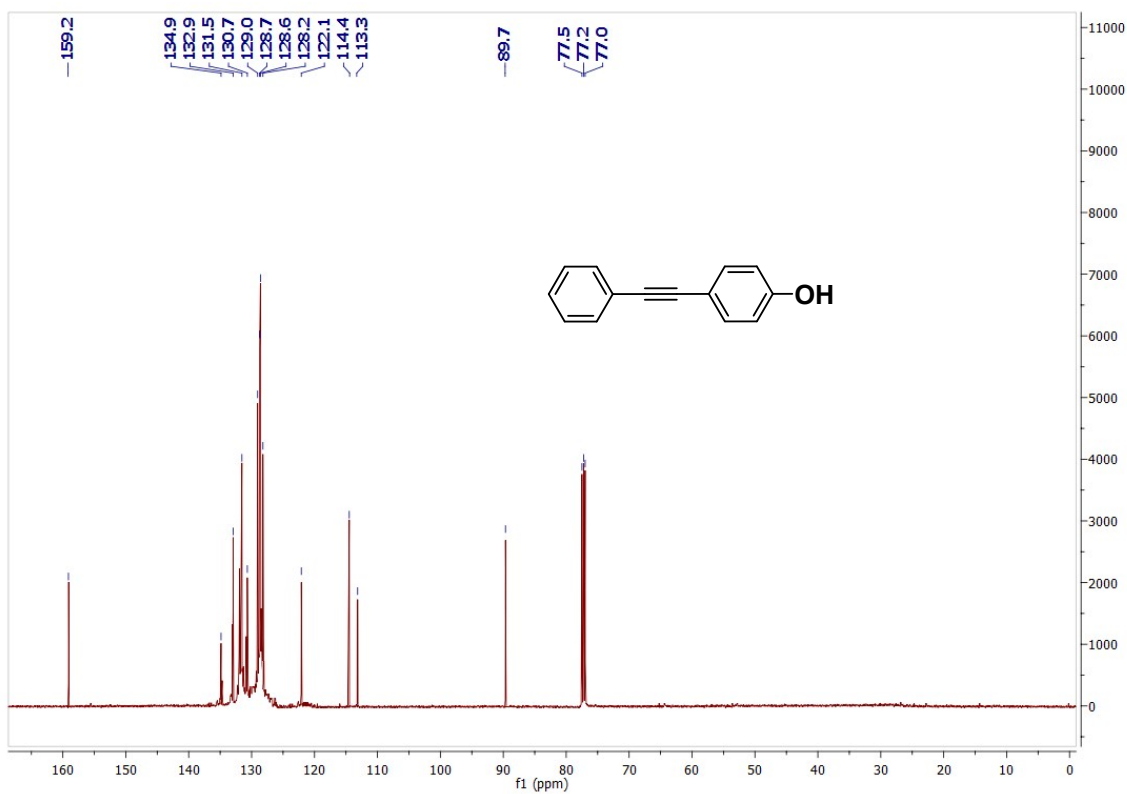

Fig. S33A:  $^1\text{H}$  NMR Spectra ( $\text{CDCl}_3$ , 500 MHz, ppm) of compound 4h:

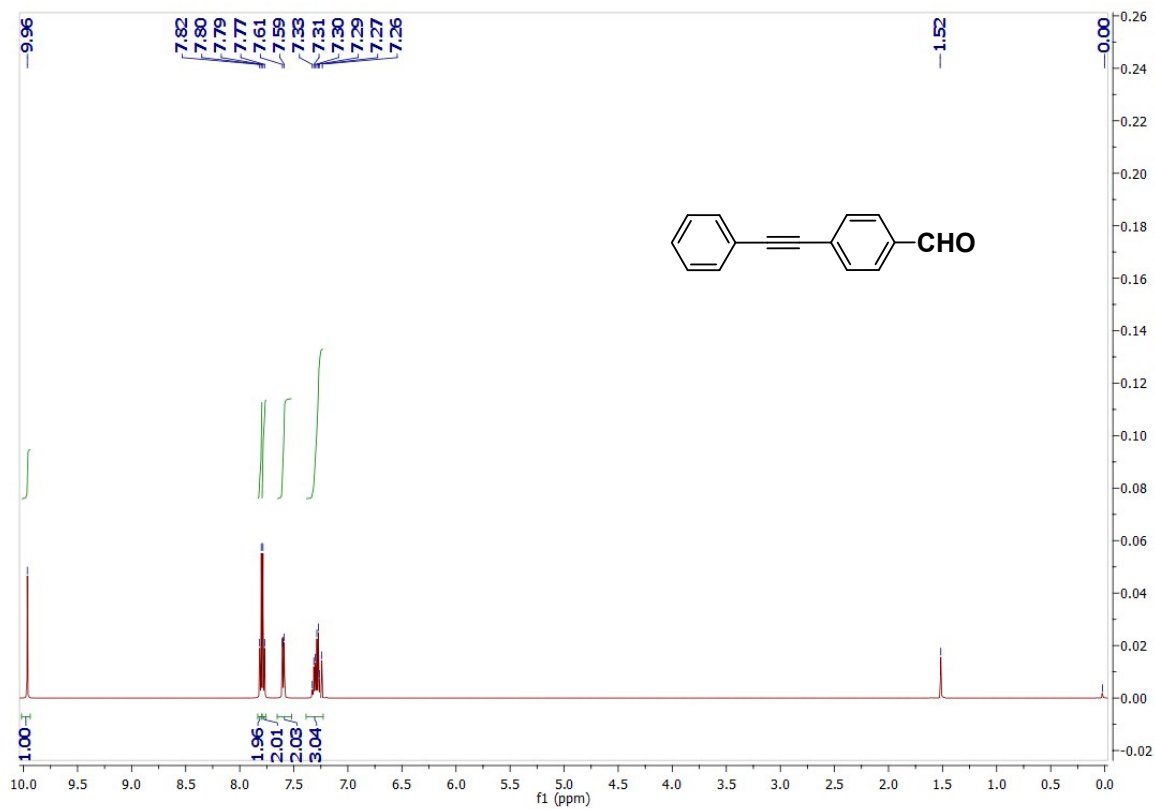

Fig. S33B:  $^{13}\text{C}$  NMR Spectra ( $\text{CDCl}_3$ , 125 MHz, ppm) of compound 4h:

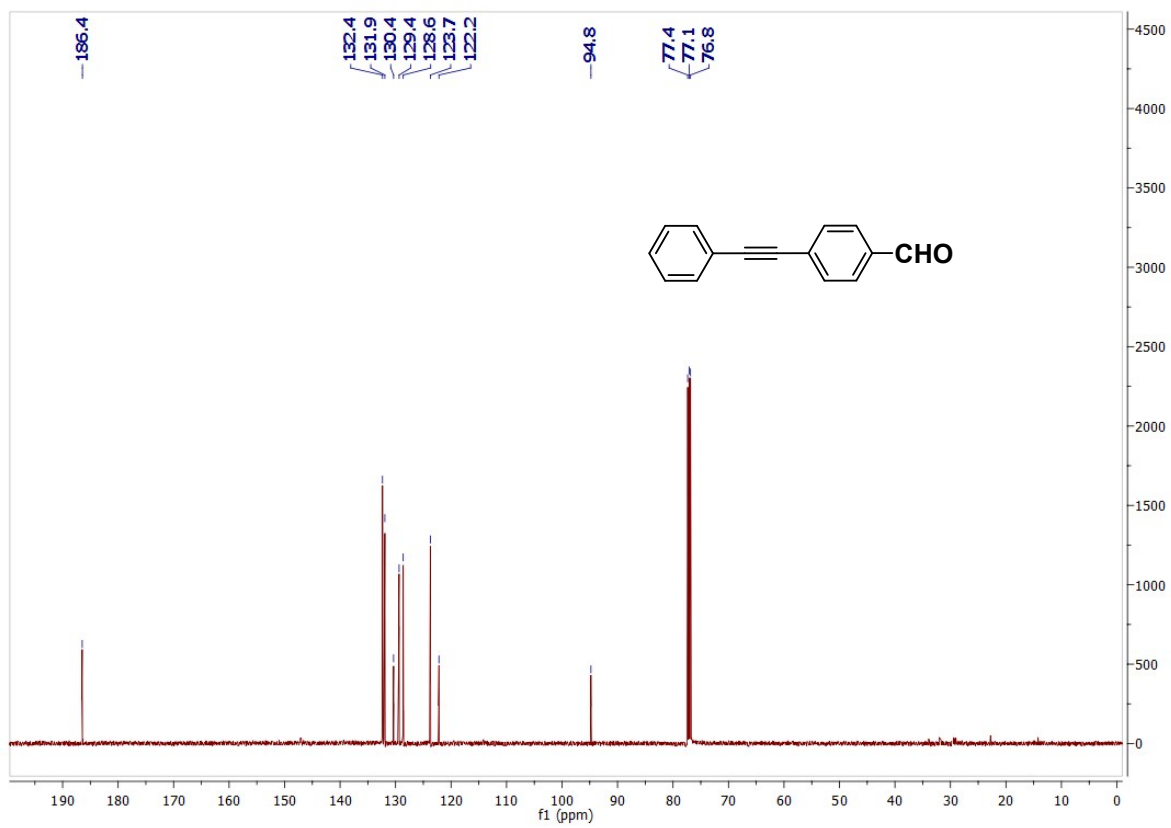

Fig. S34A: <sup>1</sup>H NMR Spectra (CDCl<sub>3</sub>, 300 MHz, ppm) of compound 4i:

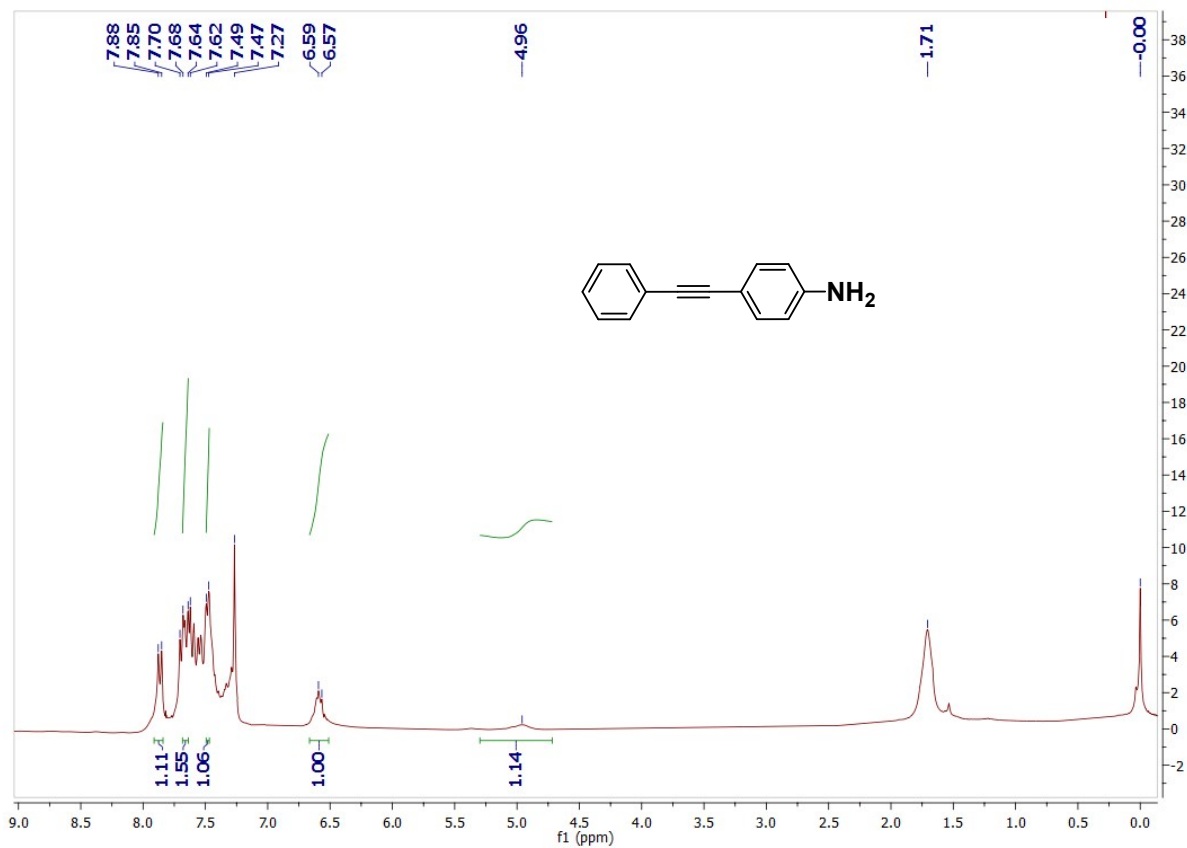

Fig. S34B: <sup>13</sup>C NMR Spectra (CDCl<sub>3</sub>, 75 MHz, ppm) of compound 4i:

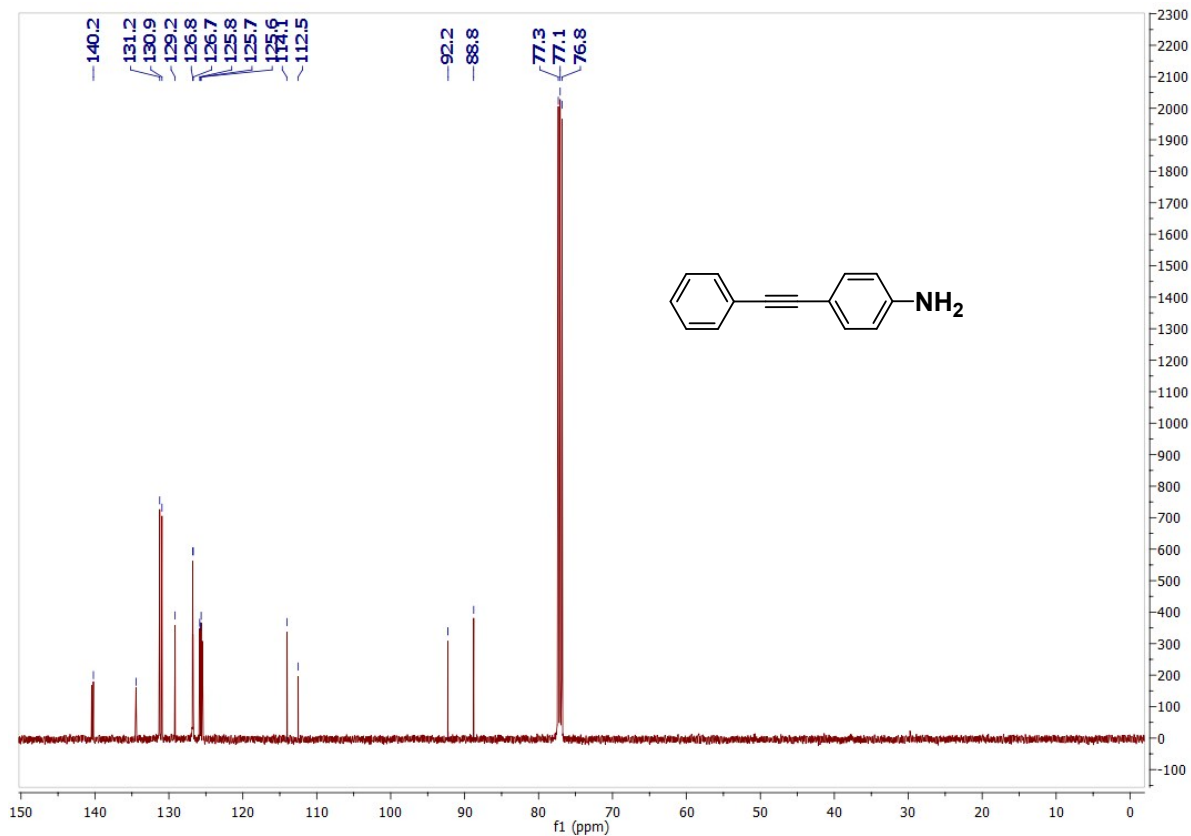



Fig. S35A:  $^1\text{H}$  NMR Spectra ( $\text{CDCl}_3$ , 300 MHz, ppm) of compound 4j:

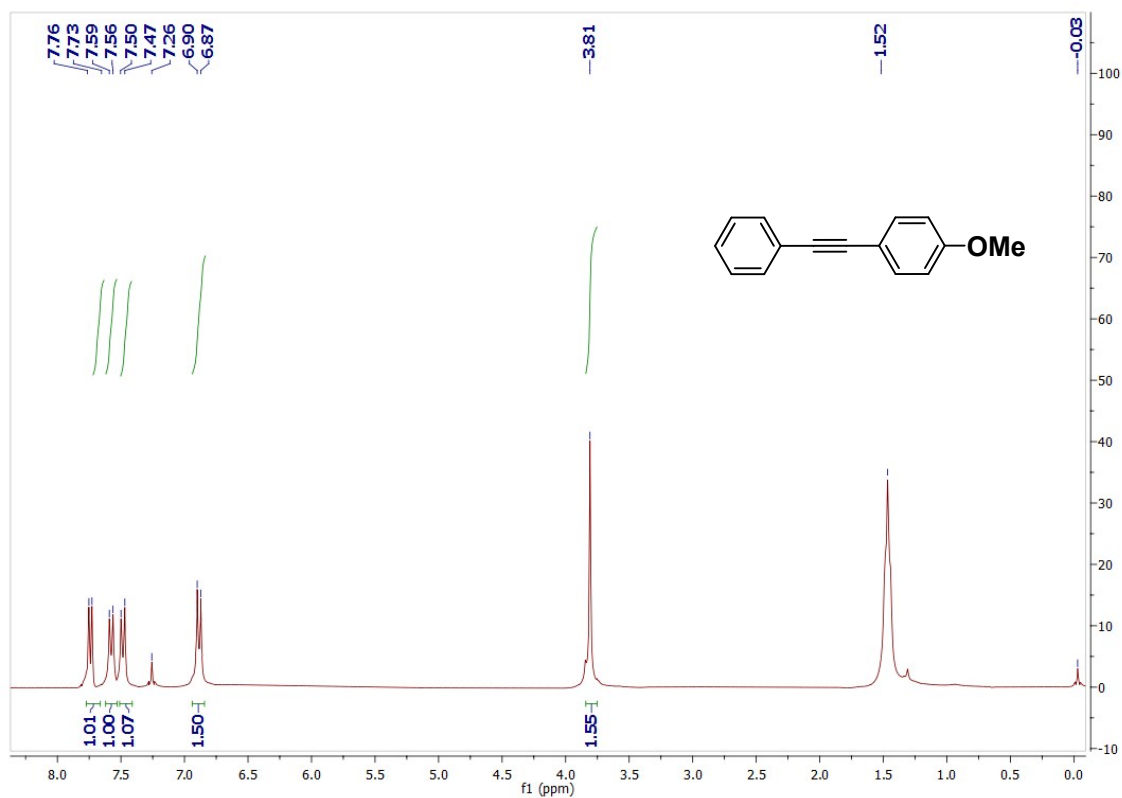

Fig. S35B:  $^{13}\text{C}$  NMR Spectra ( $\text{CDCl}_3$ , 75 MHz, ppm) of compound 4j:

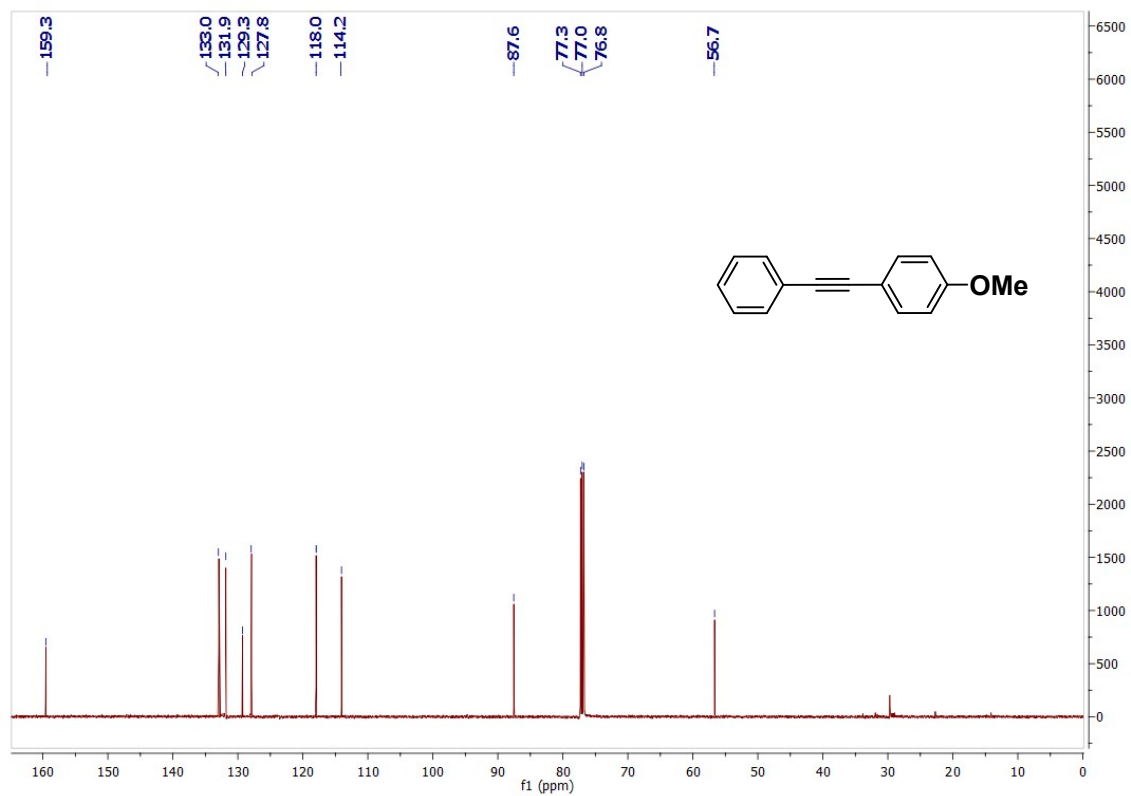

Fig. S36A: <sup>1</sup>H NMR Spectra (CDCl<sub>3</sub>, 300 MHz, ppm) of compound 4k:

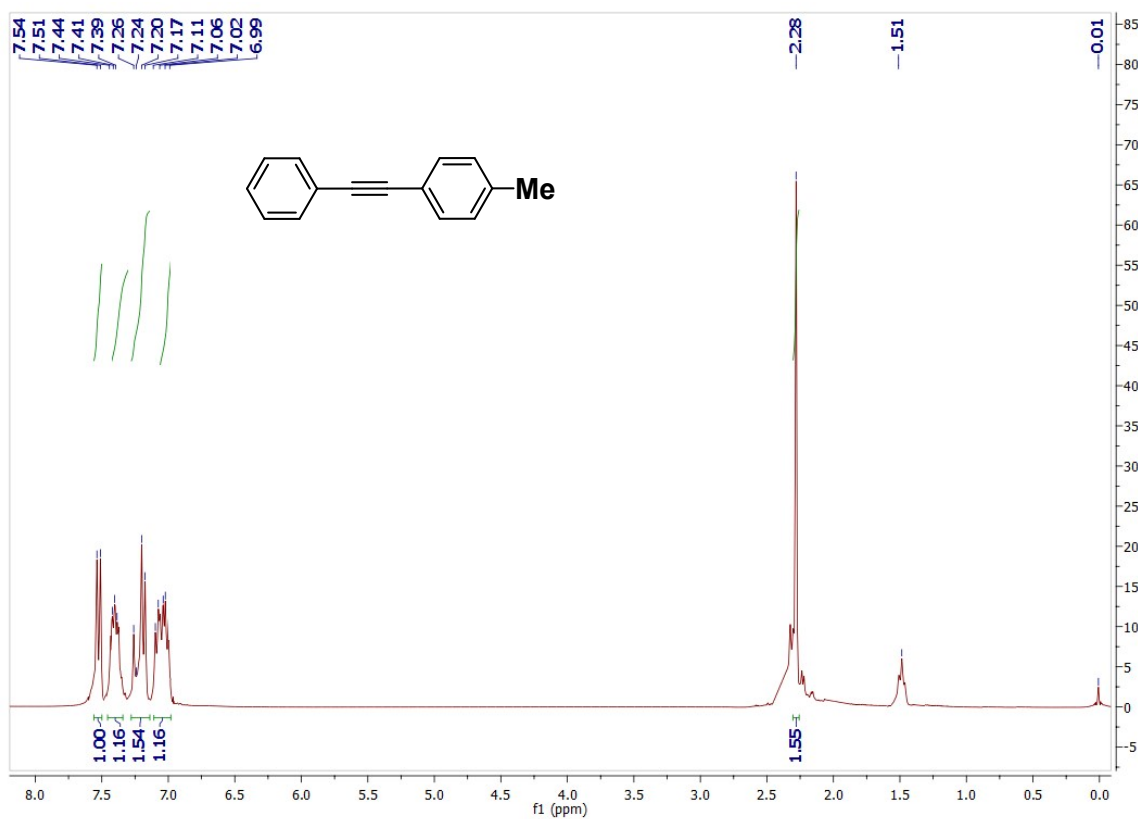

Fig. S36B: <sup>13</sup>C NMR Spectra (CDCl<sub>3</sub>, 75 MHz, ppm) of compound 4k:

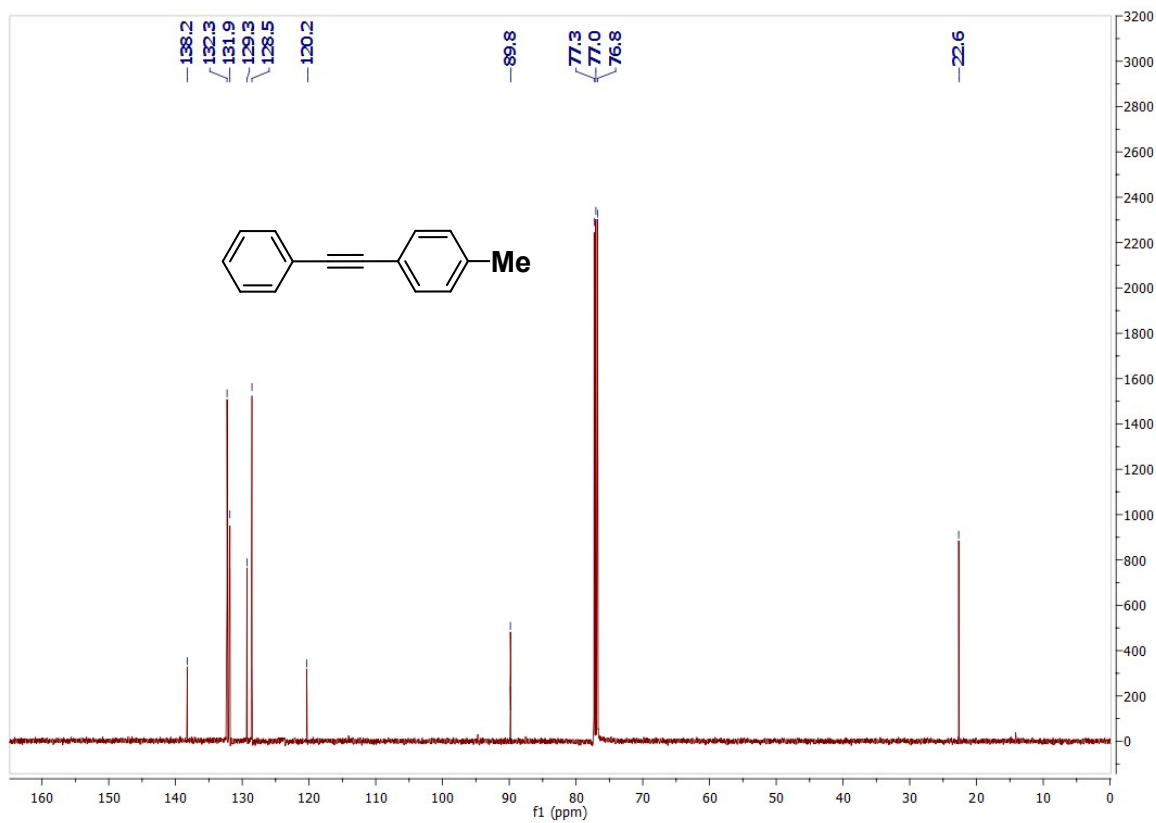

Fig. S37A:  $^1\text{H}$  NMR Spectra ( $\text{CDCl}_3$ , 500 MHz, ppm) of compound 4l:

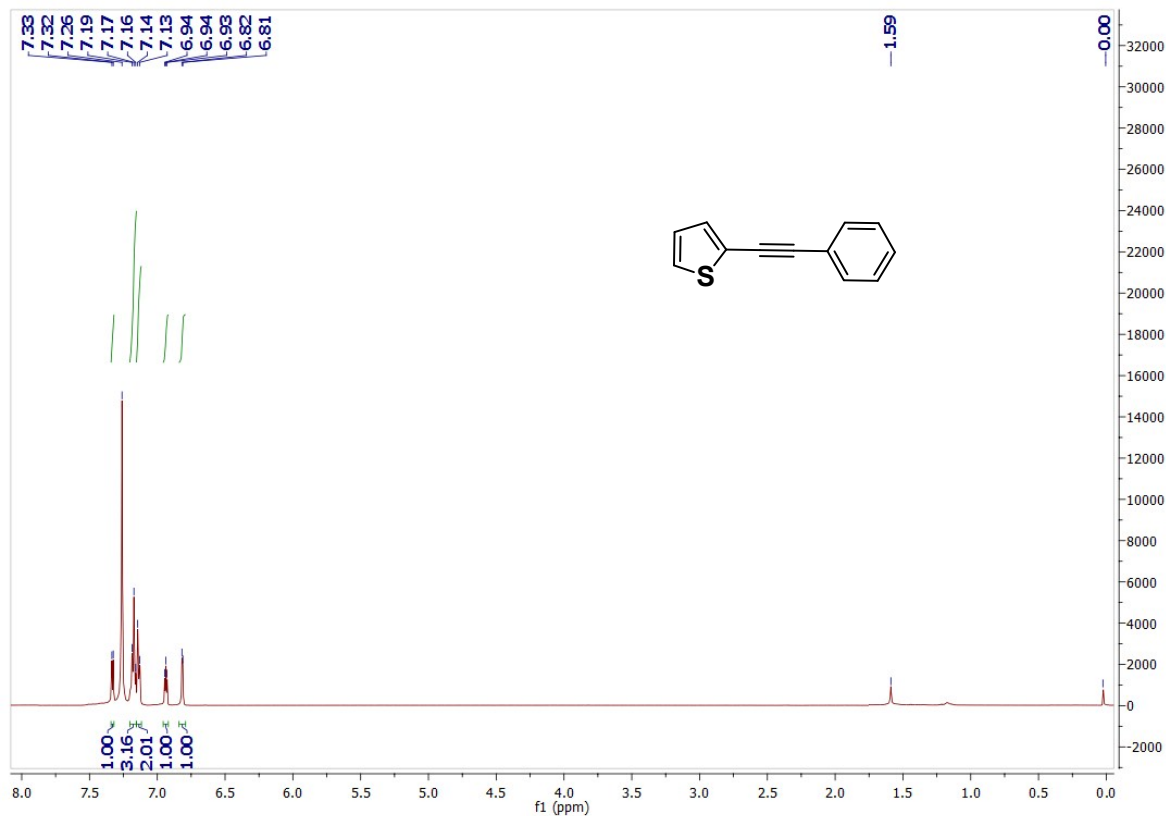

Fig. S37B:  $^{13}\text{C}$  NMR Spectra ( $\text{CDCl}_3$ , 125 MHz, ppm) of compound 4l:

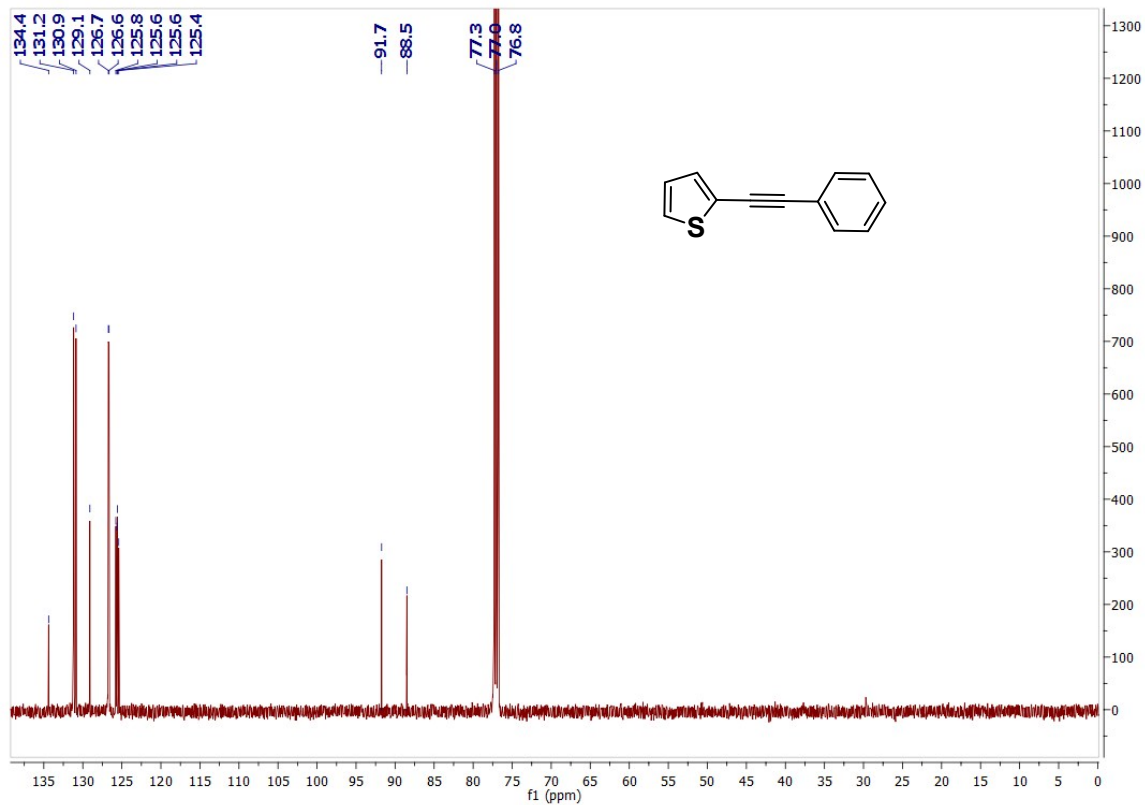

Fig. S38A: <sup>1</sup>H NMR Spectra (CDCl<sub>3</sub>, 500 MHz, ppm) of compound 4m:

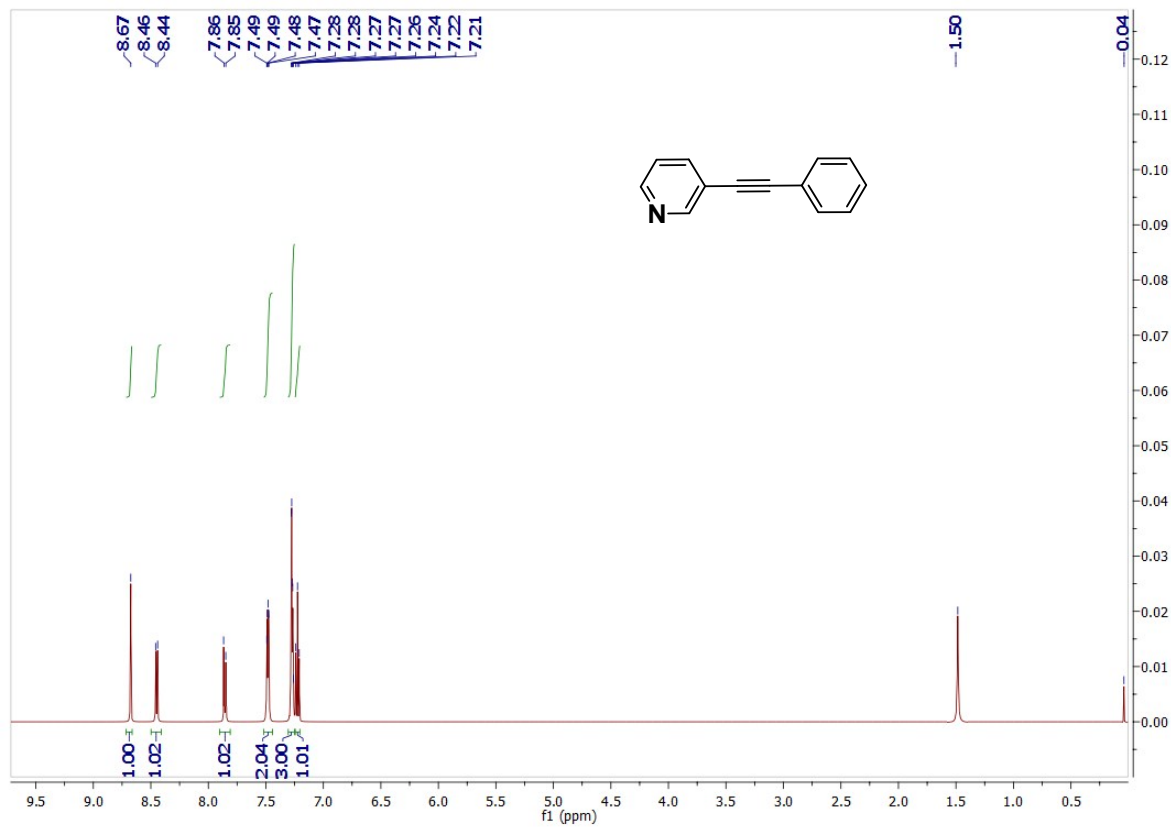

Fig. S38B: <sup>13</sup>C NMR Spectra (CDCl<sub>3</sub>, 125 MHz, ppm) of compound 4m:

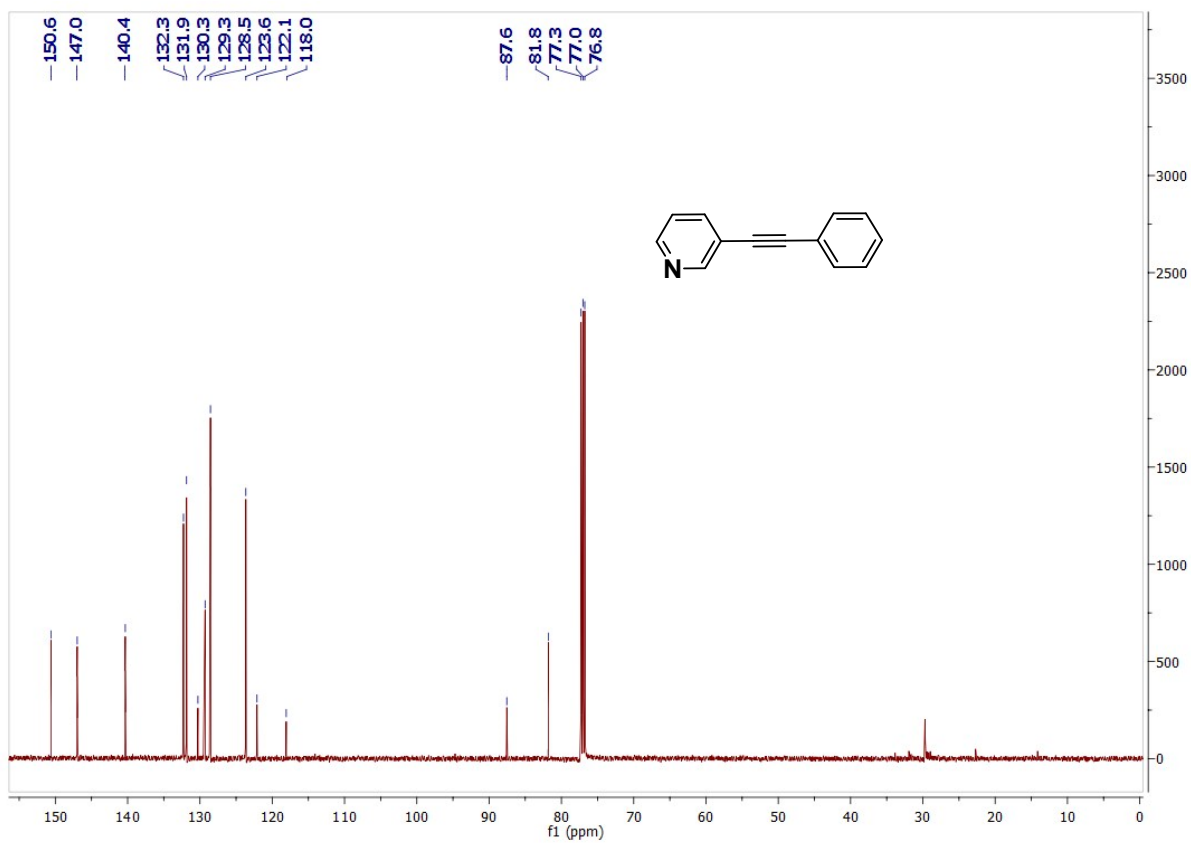

Fig. S39A: <sup>1</sup>H NMR Spectra (CDCl<sub>3</sub>, 500 MHz, ppm) of compound 6:

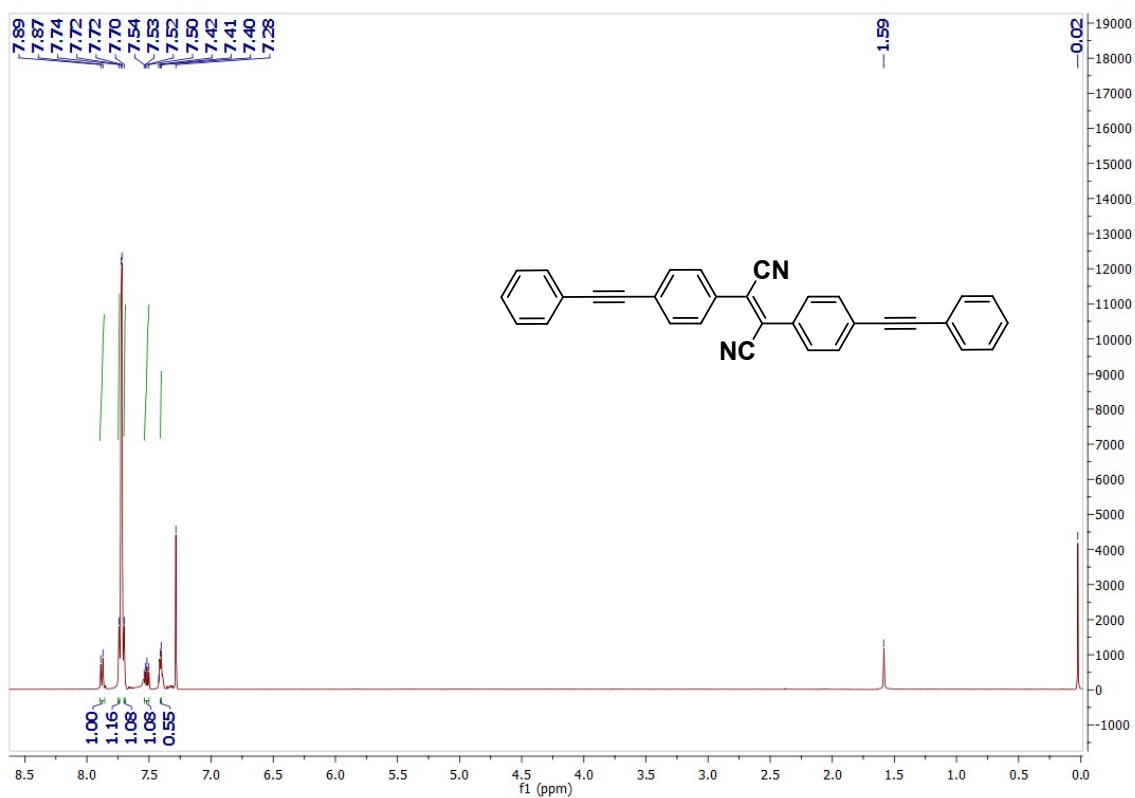

Fig. S39B: <sup>13</sup>C NMR Spectra (CDCl<sub>3</sub>, 125 MHz, ppm) of compound 6:

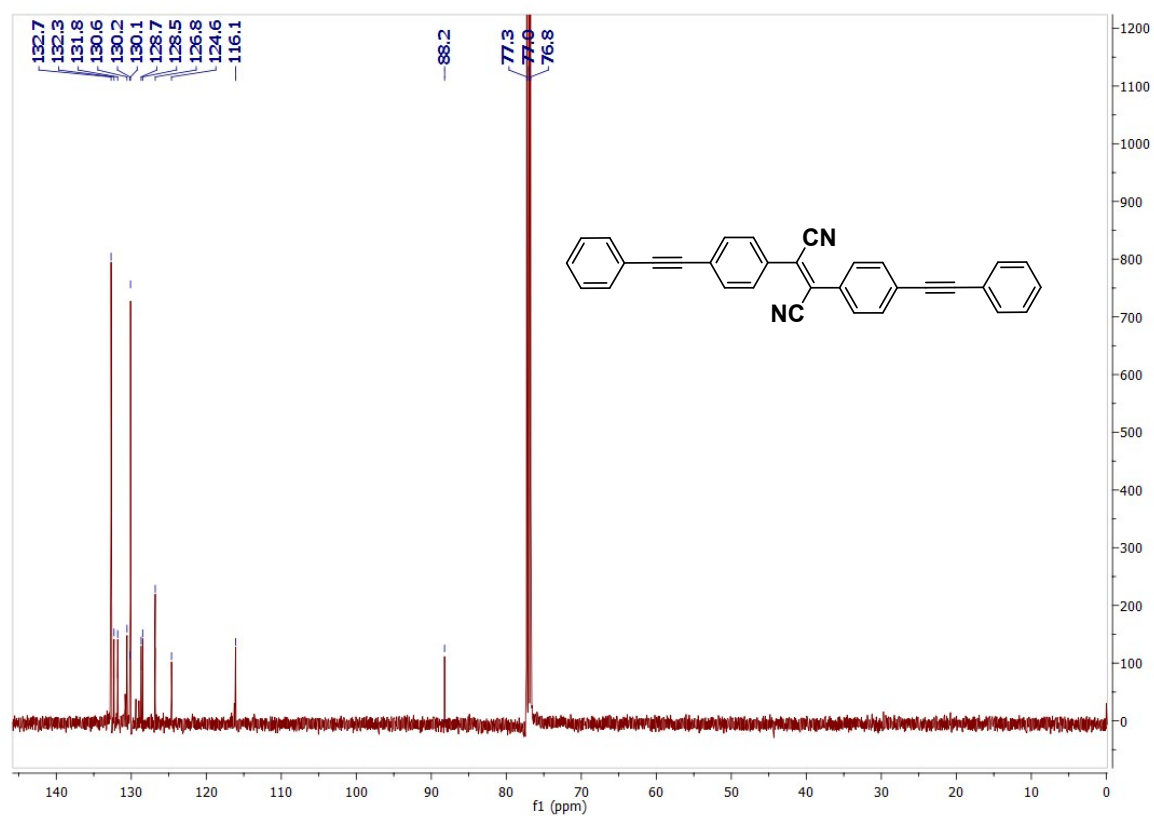

Fig. S40A:  $^1\text{H}$  NMR Spectra ( $\text{CDCl}_3$ , 500 MHz, ppm) of compound 8:

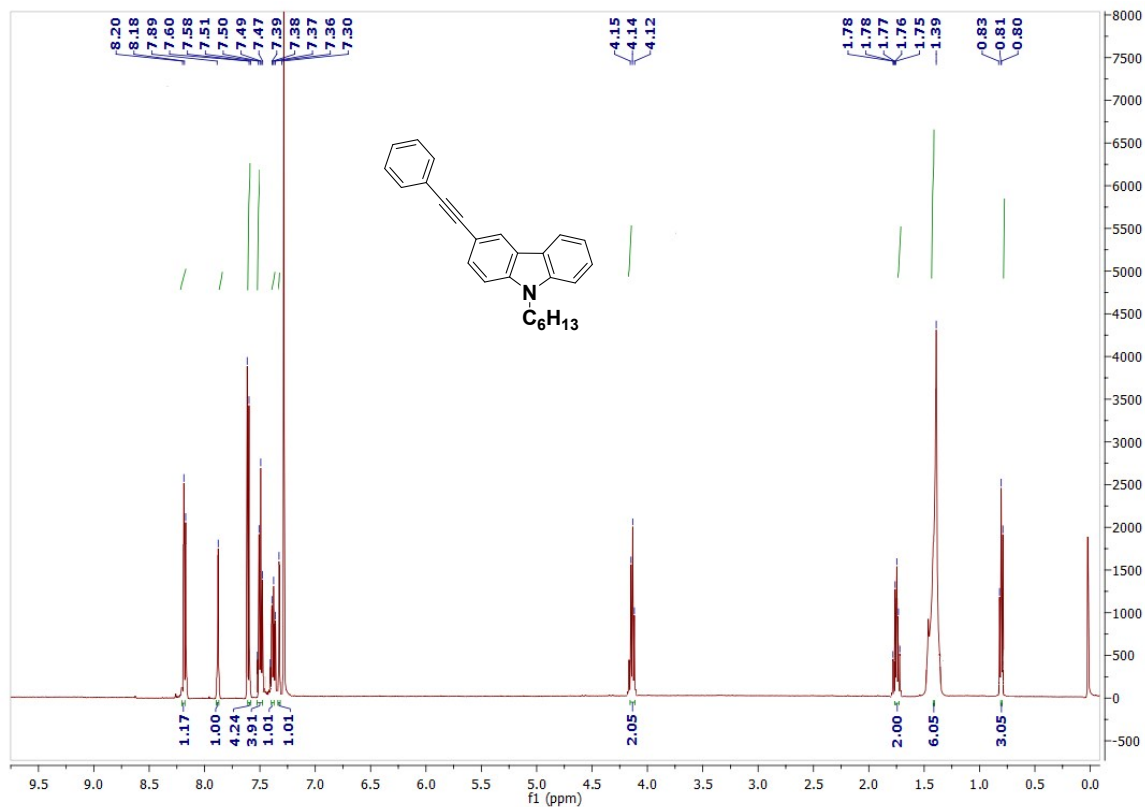

Fig. S40B:  $^{13}\text{C}$  NMR Spectra ( $\text{CDCl}_3$ , 125 MHz, ppm) of compound 8:

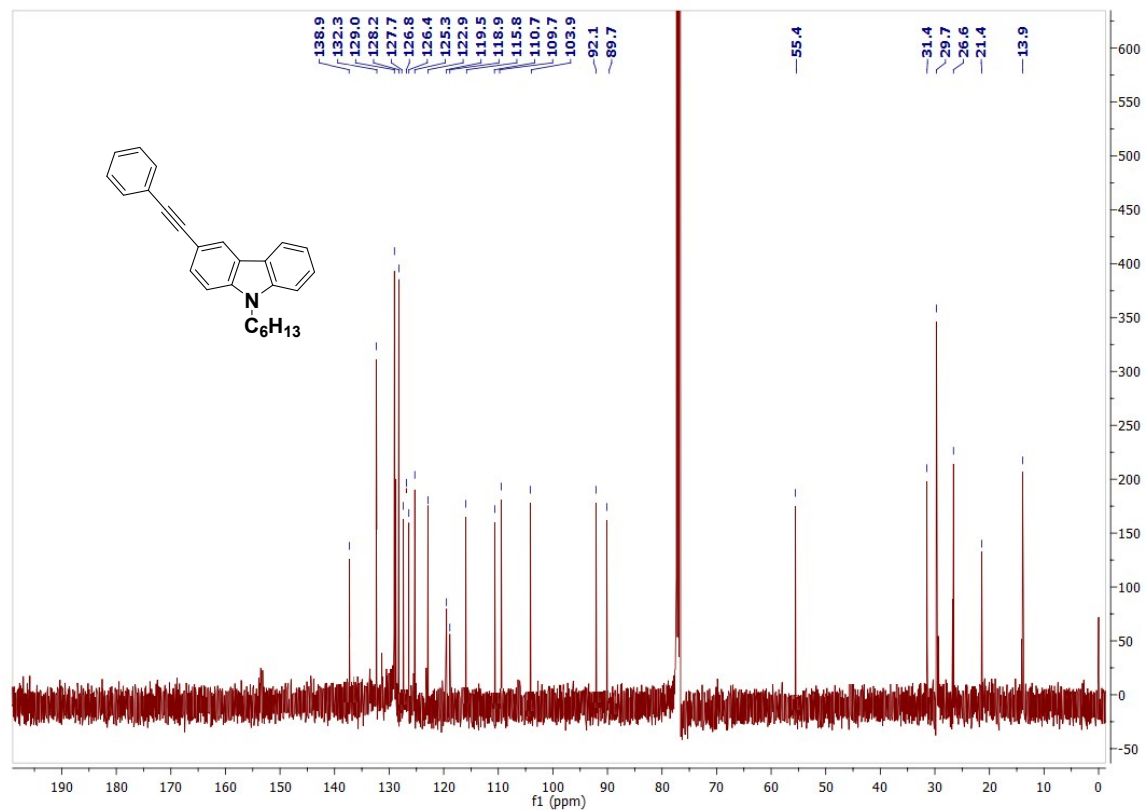

Fig. S41A:  $^1\text{H}$  NMR Spectra ( $\text{CDCl}_3$ , 500 MHz, ppm) of compound 14a:

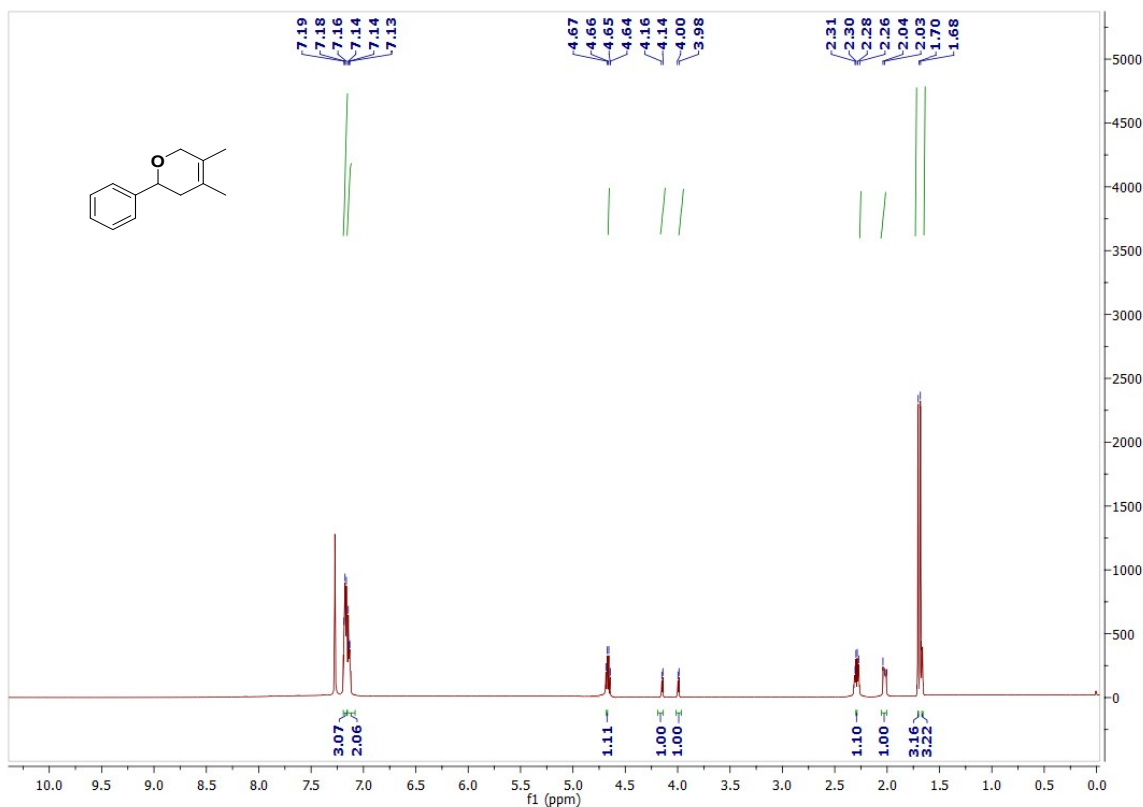

Fig. S41B:  $^{13}\text{C}$  NMR Spectra ( $\text{CDCl}_3$ , 125 MHz, ppm) of compound 14a:

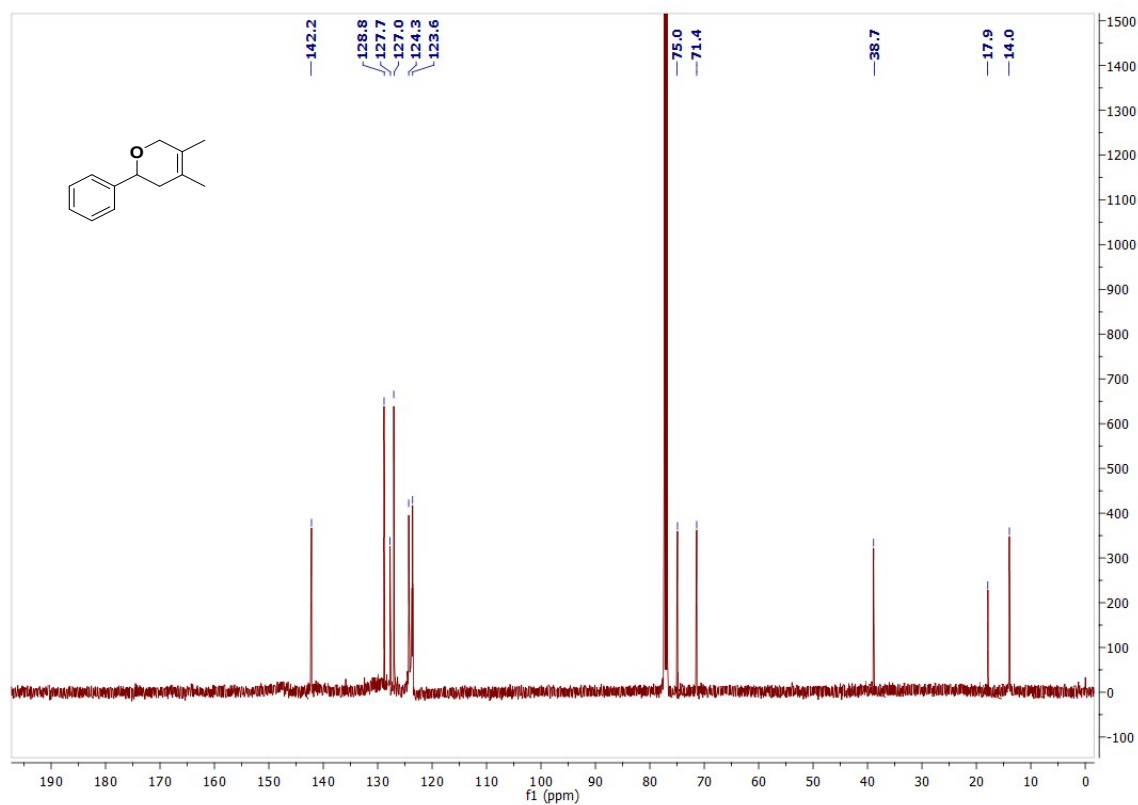

Fig. S42A: <sup>1</sup>H NMR Spectra (CDCl<sub>3</sub>, 500 MHz, ppm) of compound 14b:

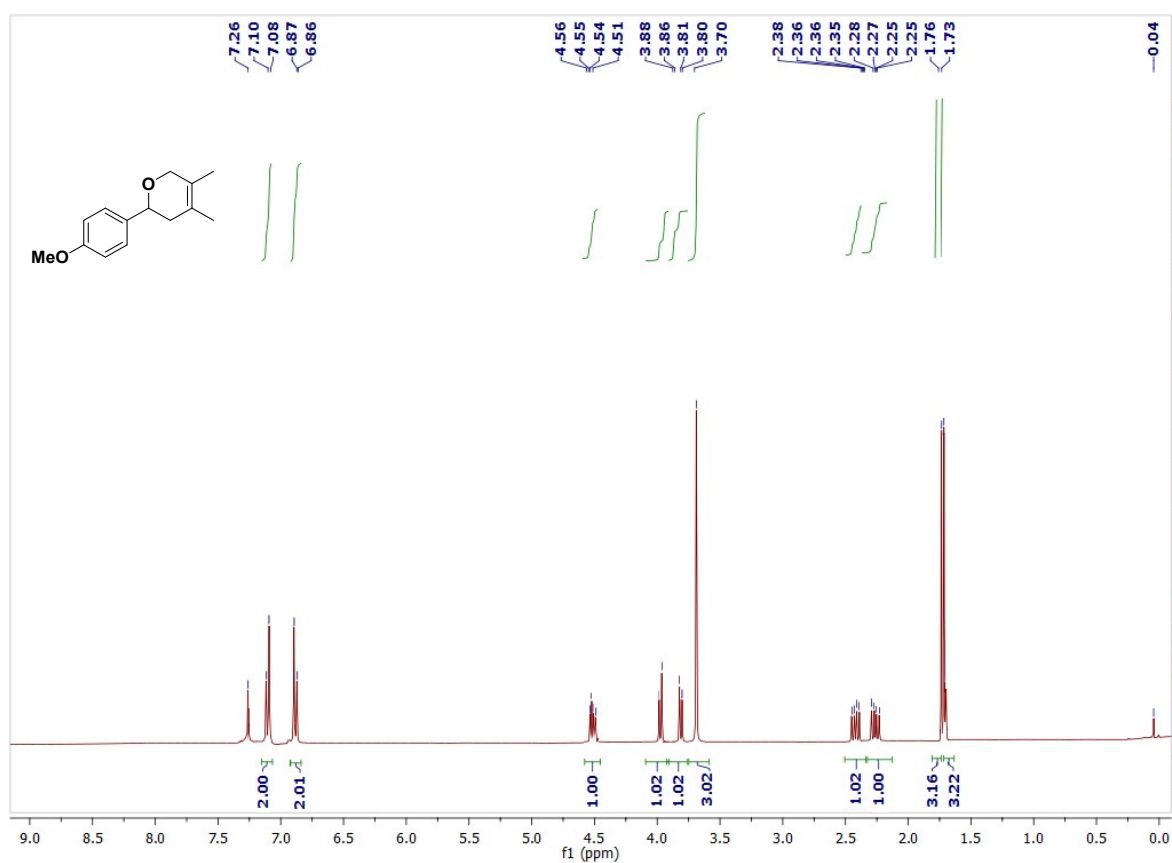

Fig. S42B: <sup>13</sup>C NMR Spectra (CDCl<sub>3</sub>, 125 MHz, ppm) of compound 14b:

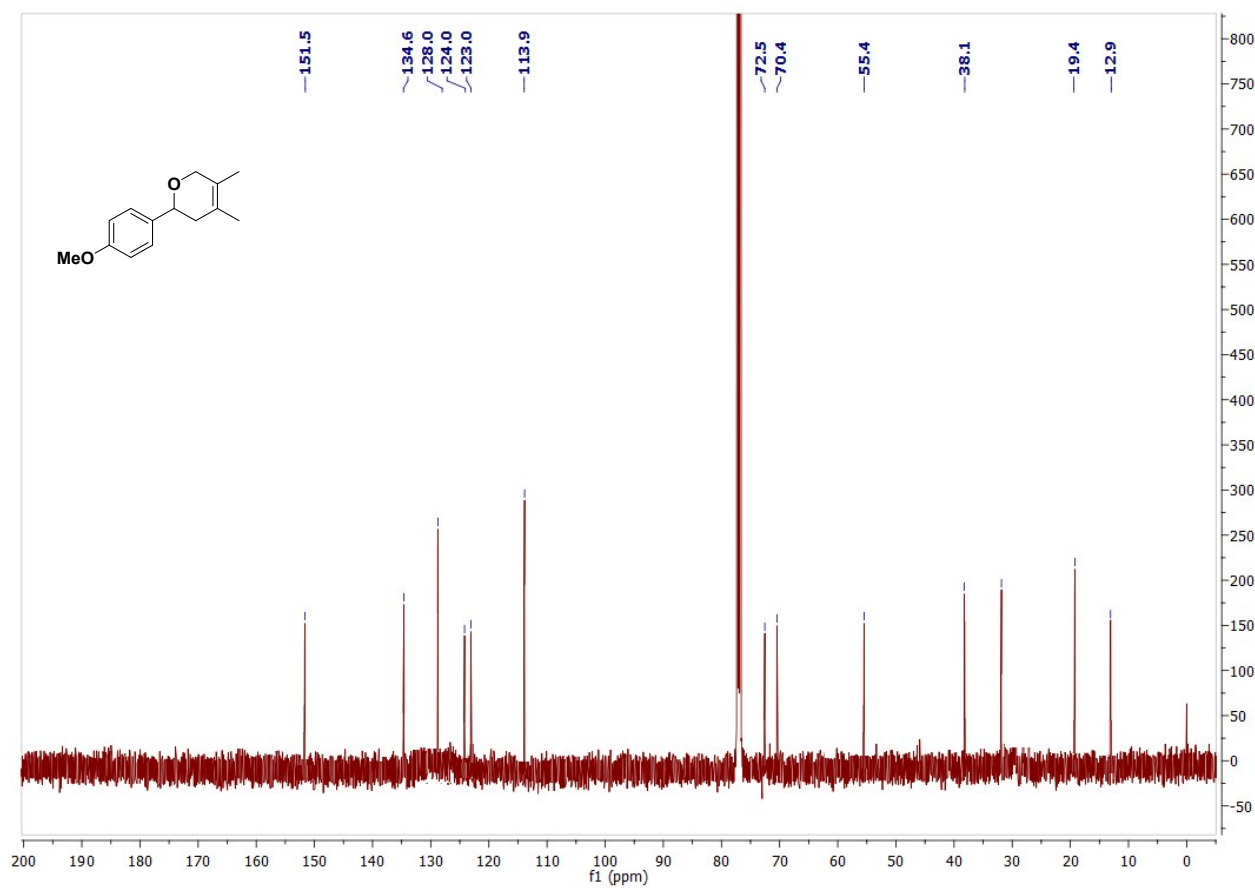



Fig. S43A: <sup>1</sup>H NMR Spectra (CDCl<sub>3</sub>, 500 MHz, ppm) of compound 14c:

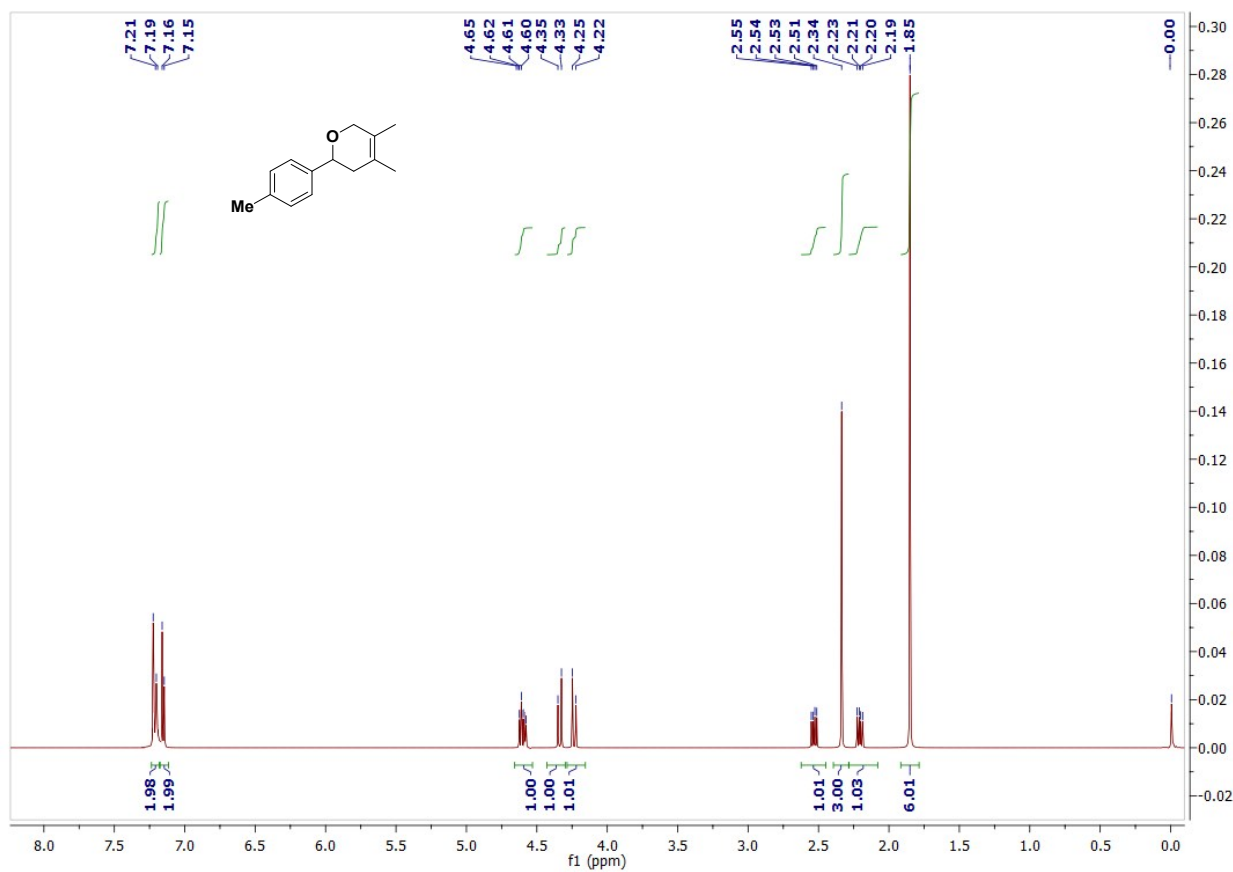

Fig. S43B: <sup>13</sup>C NMR Spectra (CDCl<sub>3</sub>, 125 MHz, ppm) of compound 14c:

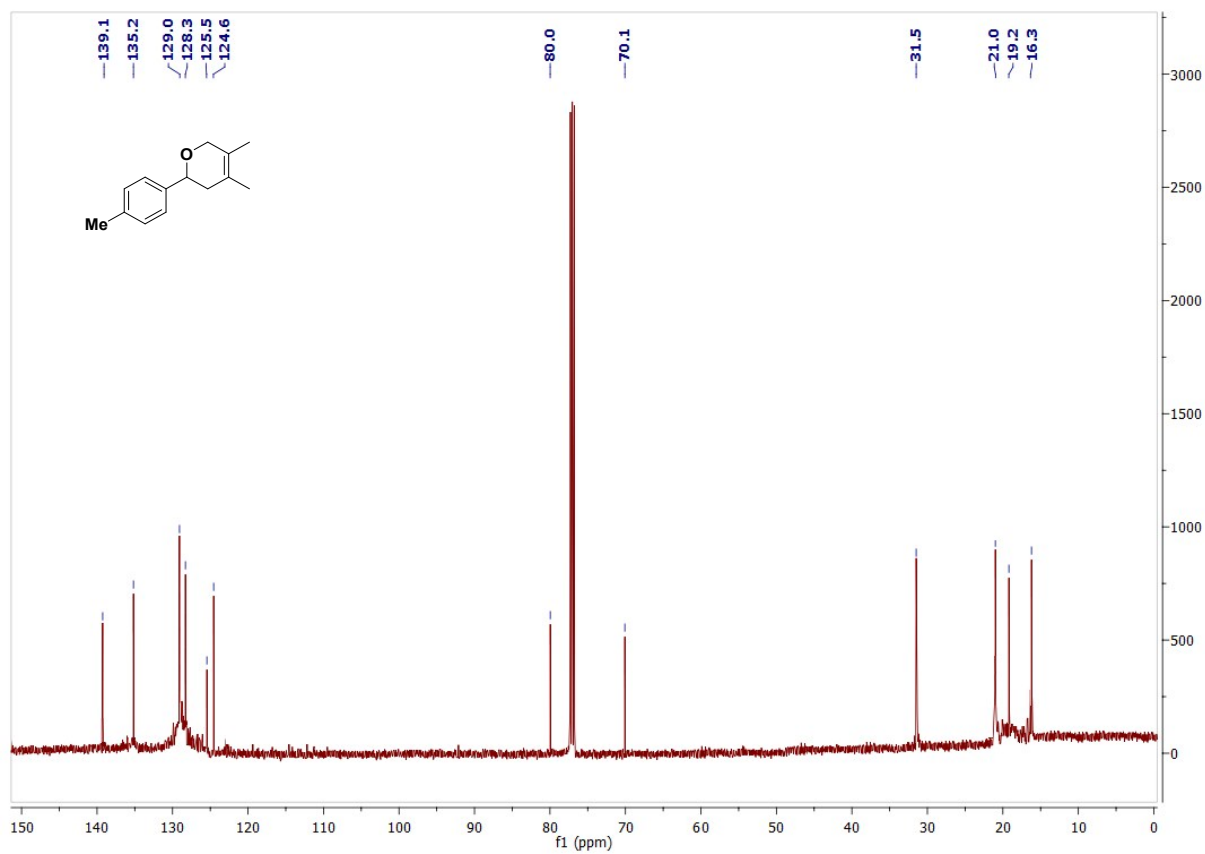

Fig. S44 A:  $^1\text{H}$  NMR Spectra ( $\text{CDCl}_3$ , 300 MHz, ppm) of compound 14d:

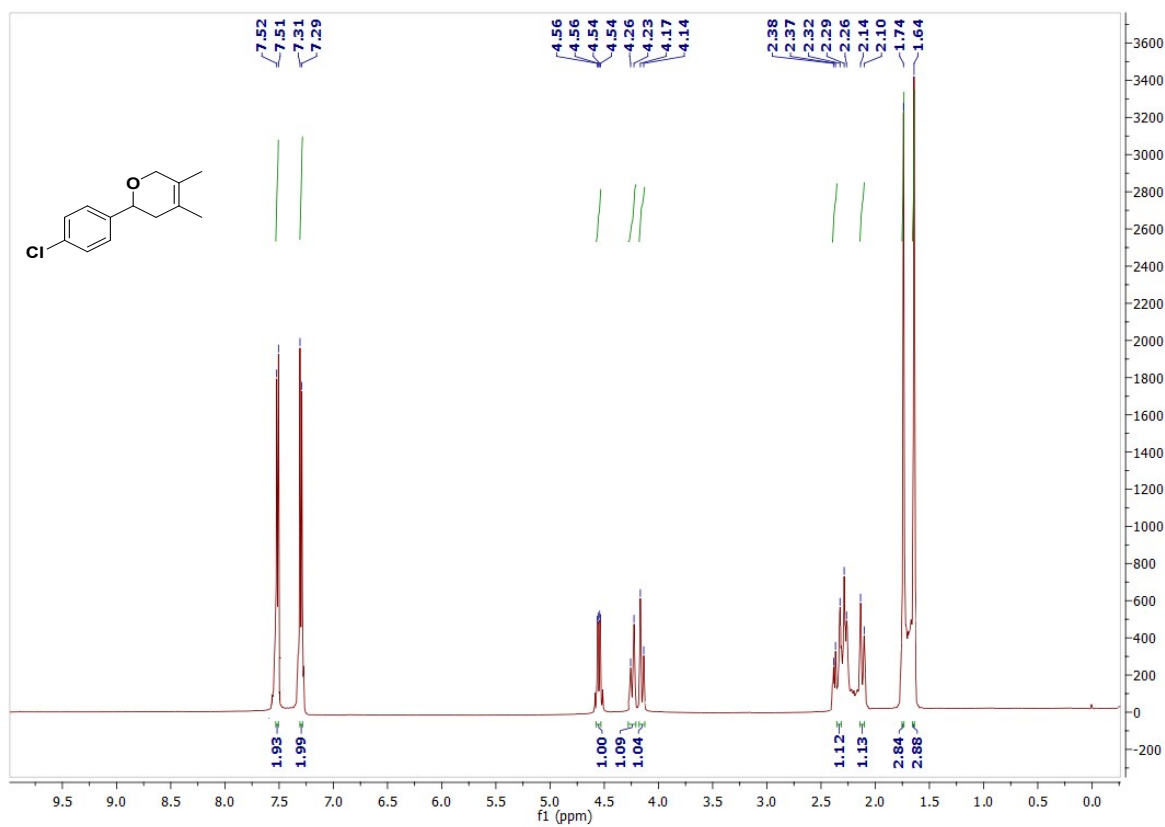

Fig. S44B:  $^{13}\text{C}$  NMR Spectra ( $\text{CDCl}_3$ , 125 MHz, ppm) of compound 14d:

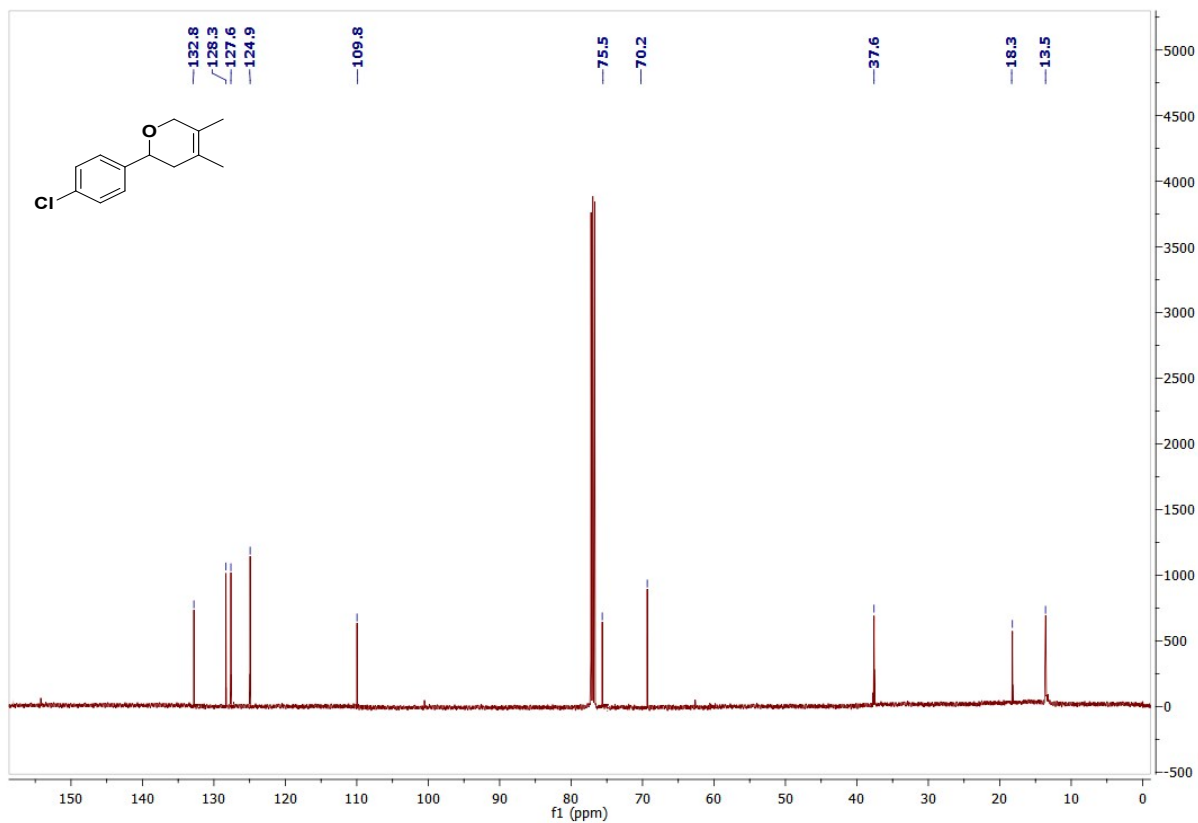

Fig. S45A: <sup>1</sup>H NMR Spectra (CDCl<sub>3</sub>, 500 MHz, ppm) of compound 14e:

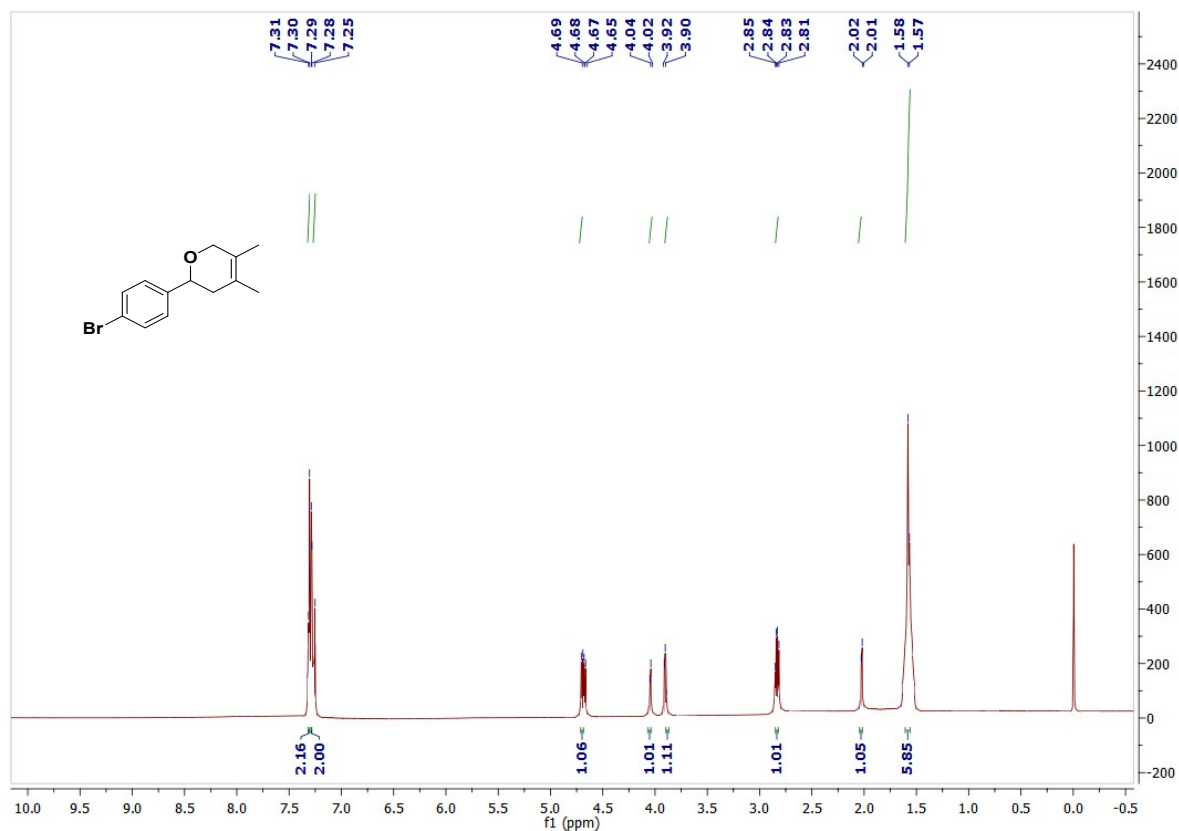

Fig. S45B: <sup>13</sup>C NMR Spectra (CDCl<sub>3</sub>, 125 MHz, ppm) of compound 14e:

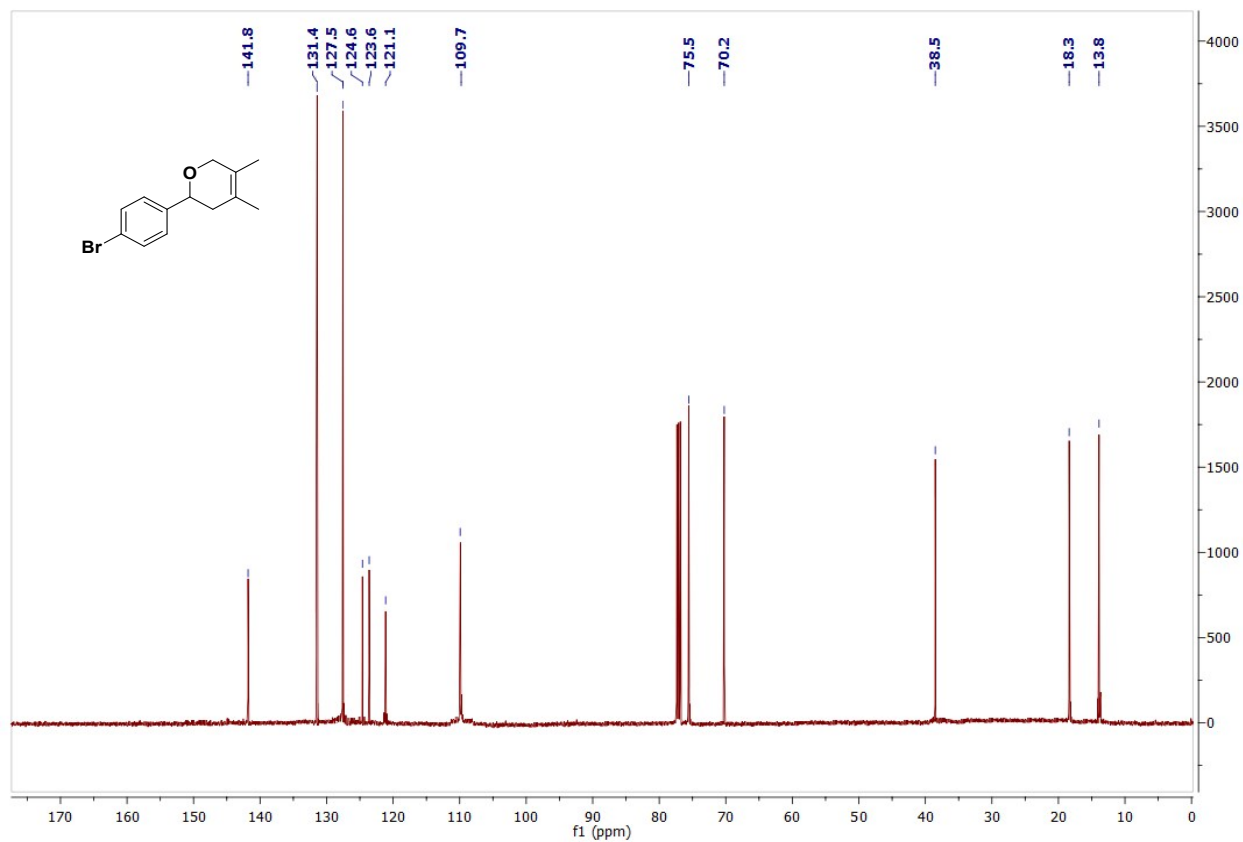

Fig. S46A: <sup>1</sup>H NMR Spectra (CDCl<sub>3</sub>, 500 MHz, ppm) of compound 14f:

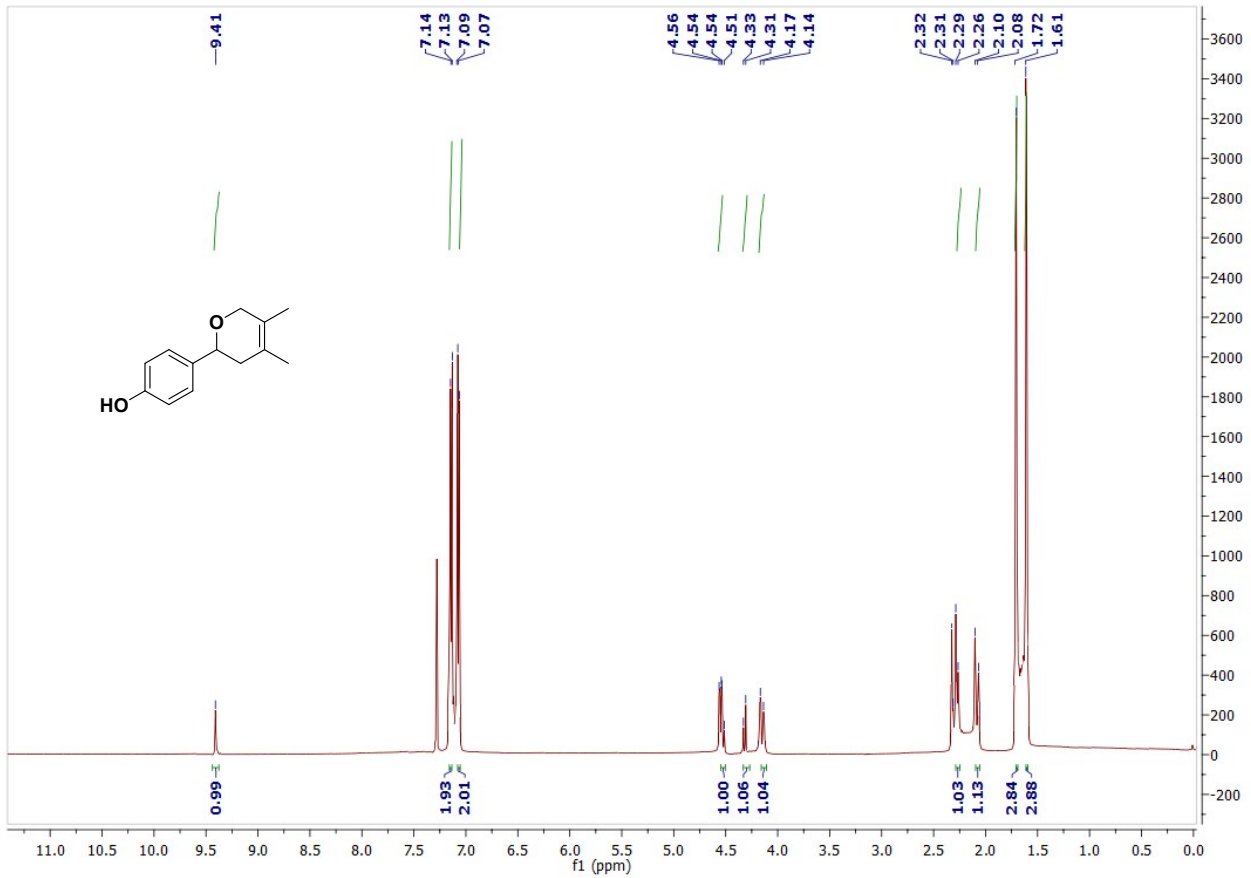

Fig. S46B: <sup>13</sup>C NMR Spectra (CDCl<sub>3</sub>, 125 MHz, ppm) of compound 14f:

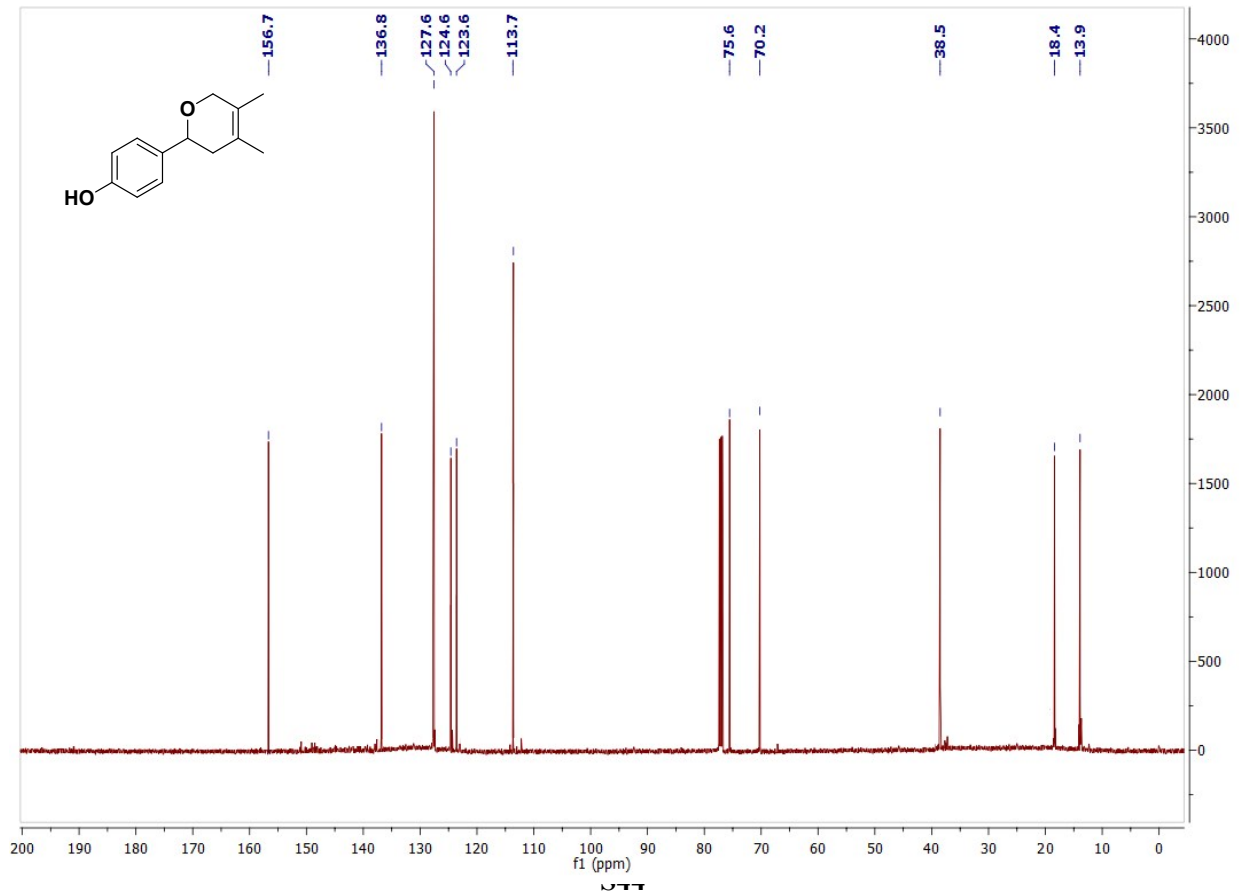

Fig. S47A: <sup>1</sup>H NMR Spectra (CDCl<sub>3</sub>, 500 MHz, ppm) of compound 14g:

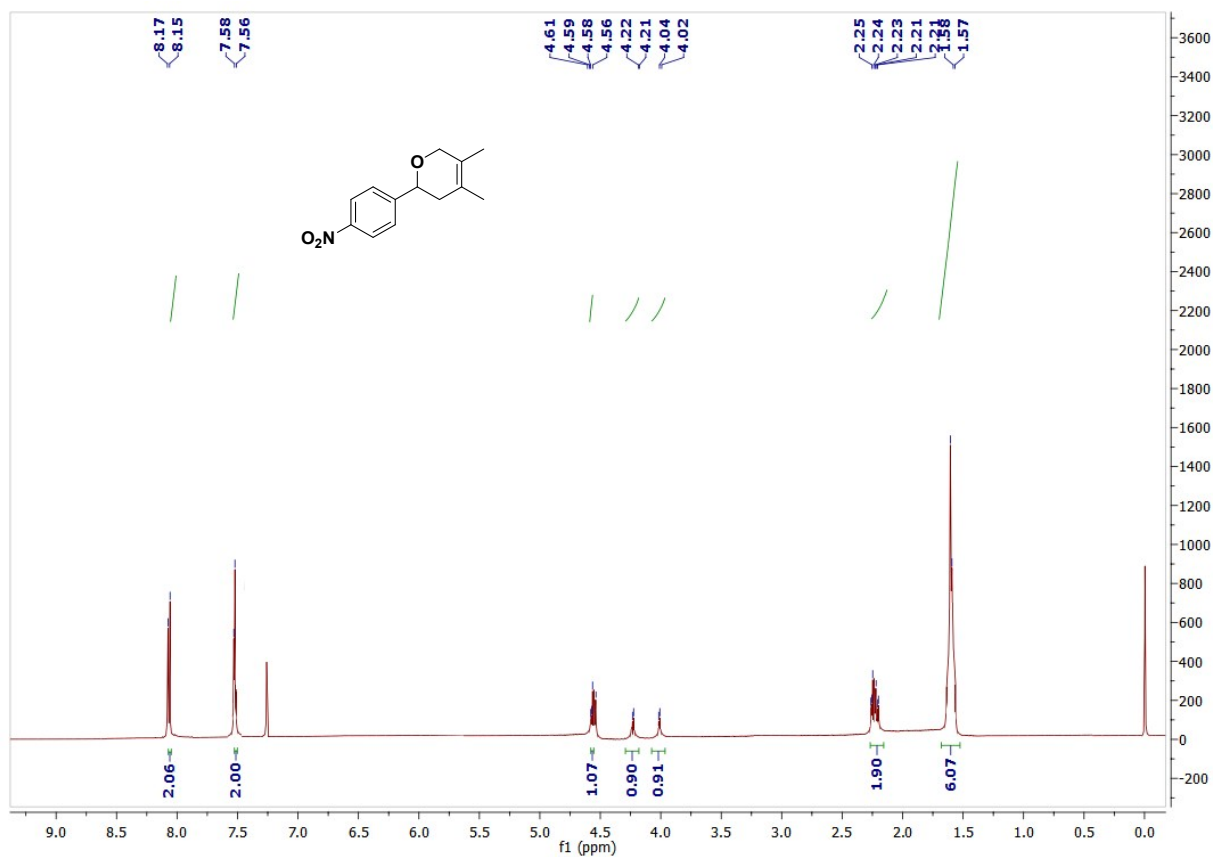

Fig. S47B: <sup>13</sup>C NMR Spectra (CDCl<sub>3</sub>, 125 MHz, ppm) of compound 14g:

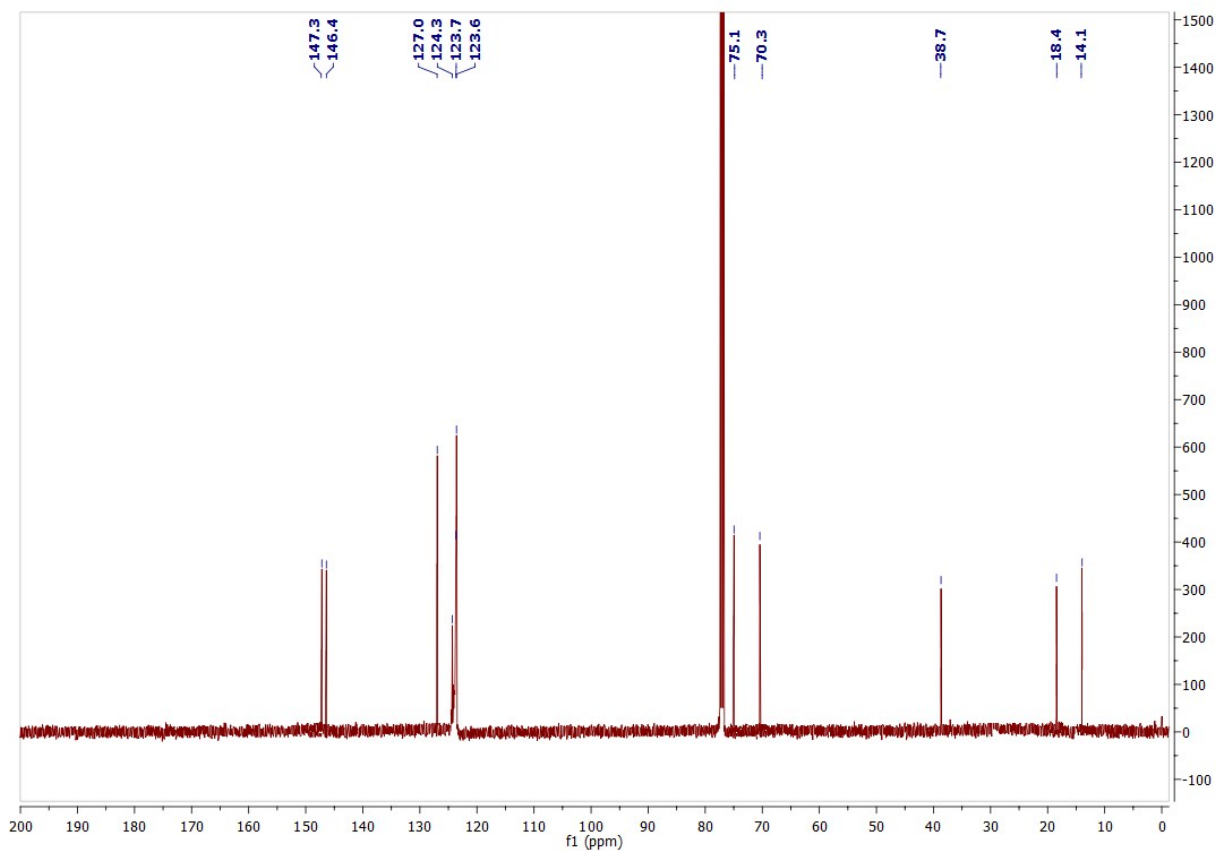

Fig. S48A: <sup>1</sup>H NMR Spectra (CDCl<sub>3</sub>, 500 MHz, ppm) of compound 14h:

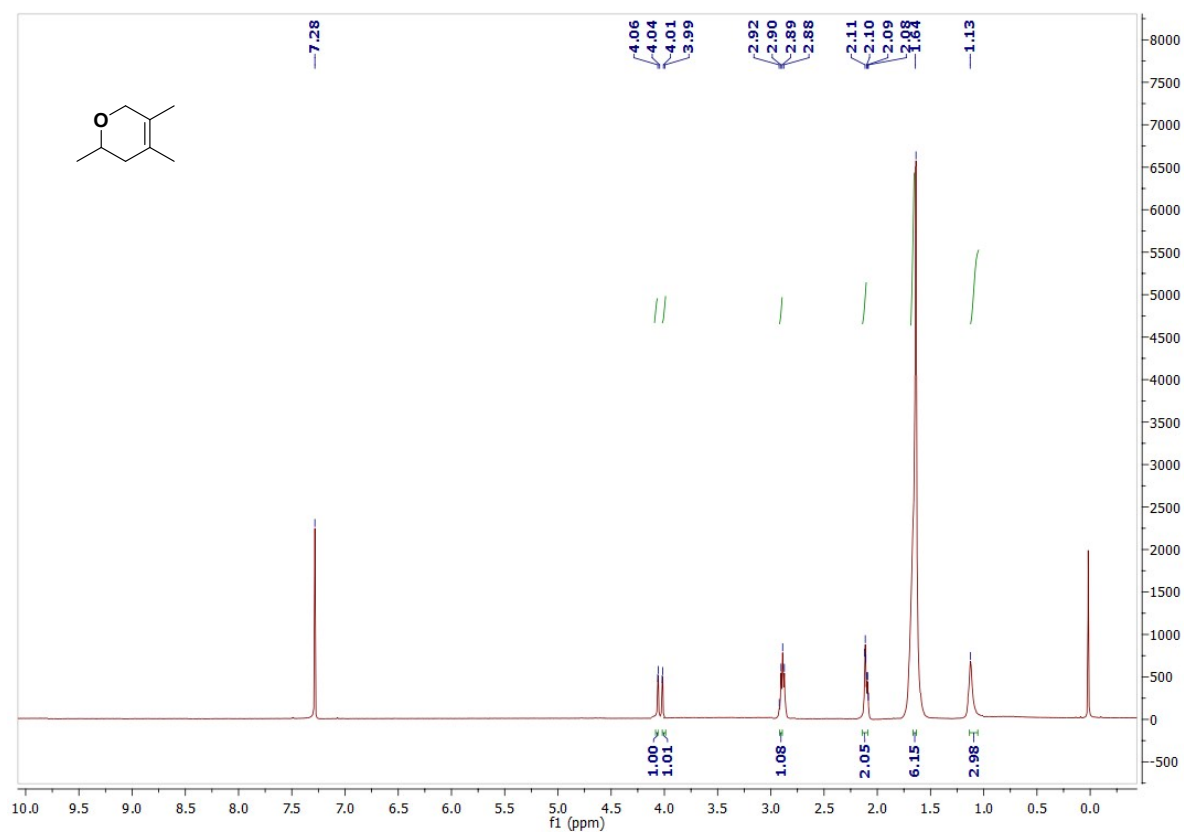

Fig. S48B: <sup>13</sup>C NMR Spectra (CDCl<sub>3</sub>, 125 MHz, ppm) of compound 14h:

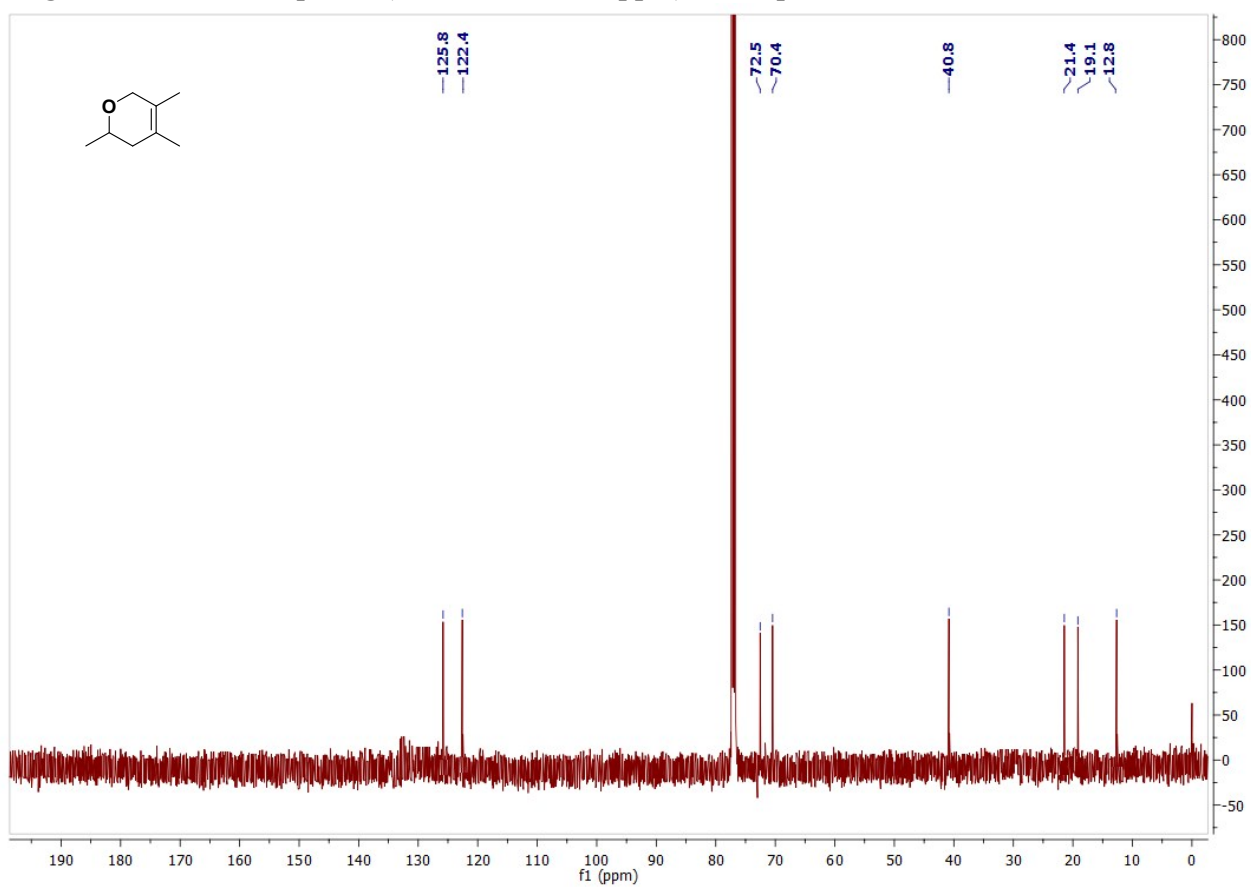

**Fig. S49A:** <sup>1</sup>H NMR Spectra (CDCl<sub>3</sub>, 300 MHz, ppm) of compound 14i:

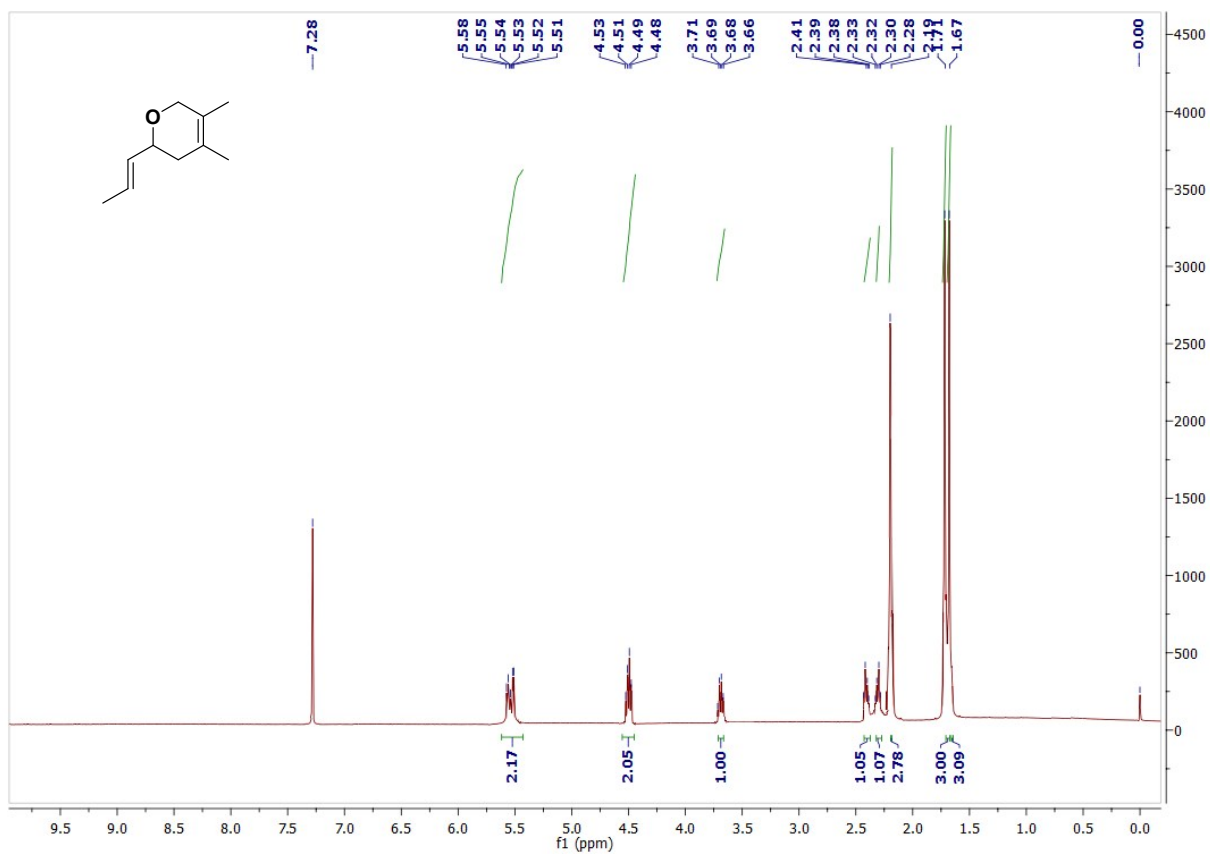

**Fig. S49B:** <sup>13</sup>C NMR Spectra (CDCl<sub>3</sub>, 125 MHz, ppm) of compound 14i:

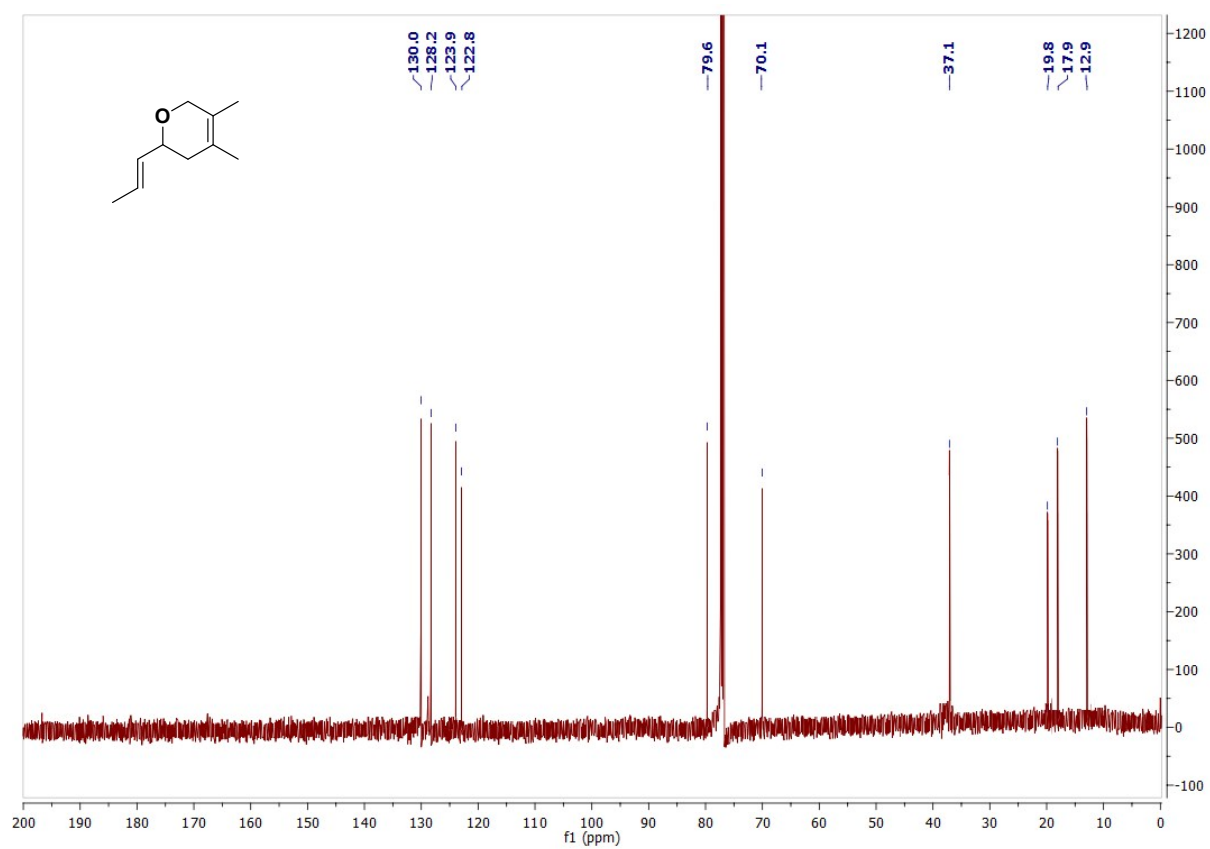

Fig. S50A: <sup>1</sup>H NMR Spectra (CDCl<sub>3</sub>, 300 MHz, ppm) of compound 14j:

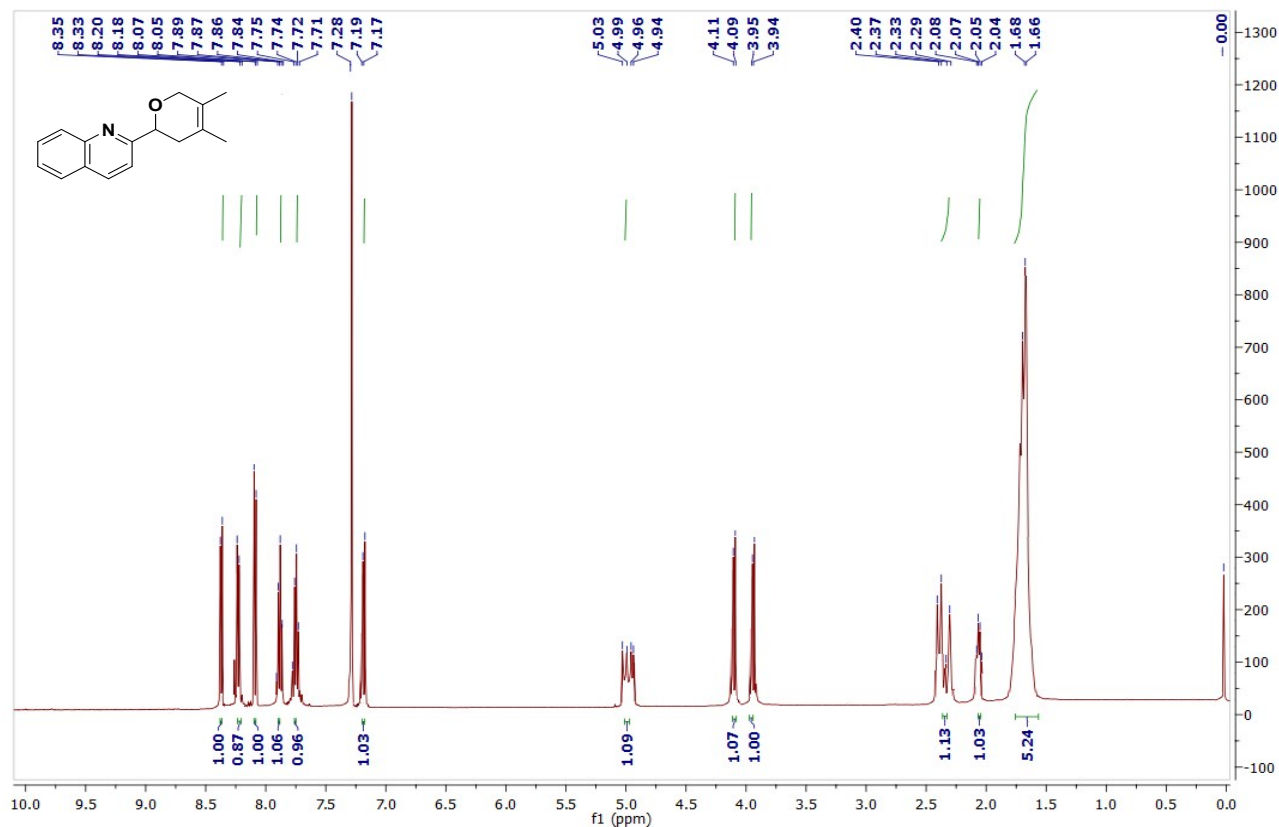

Fig. S50B: <sup>13</sup>C NMR Spectra (CDCl<sub>3</sub>, 125 MHz, ppm) of compound 14j:

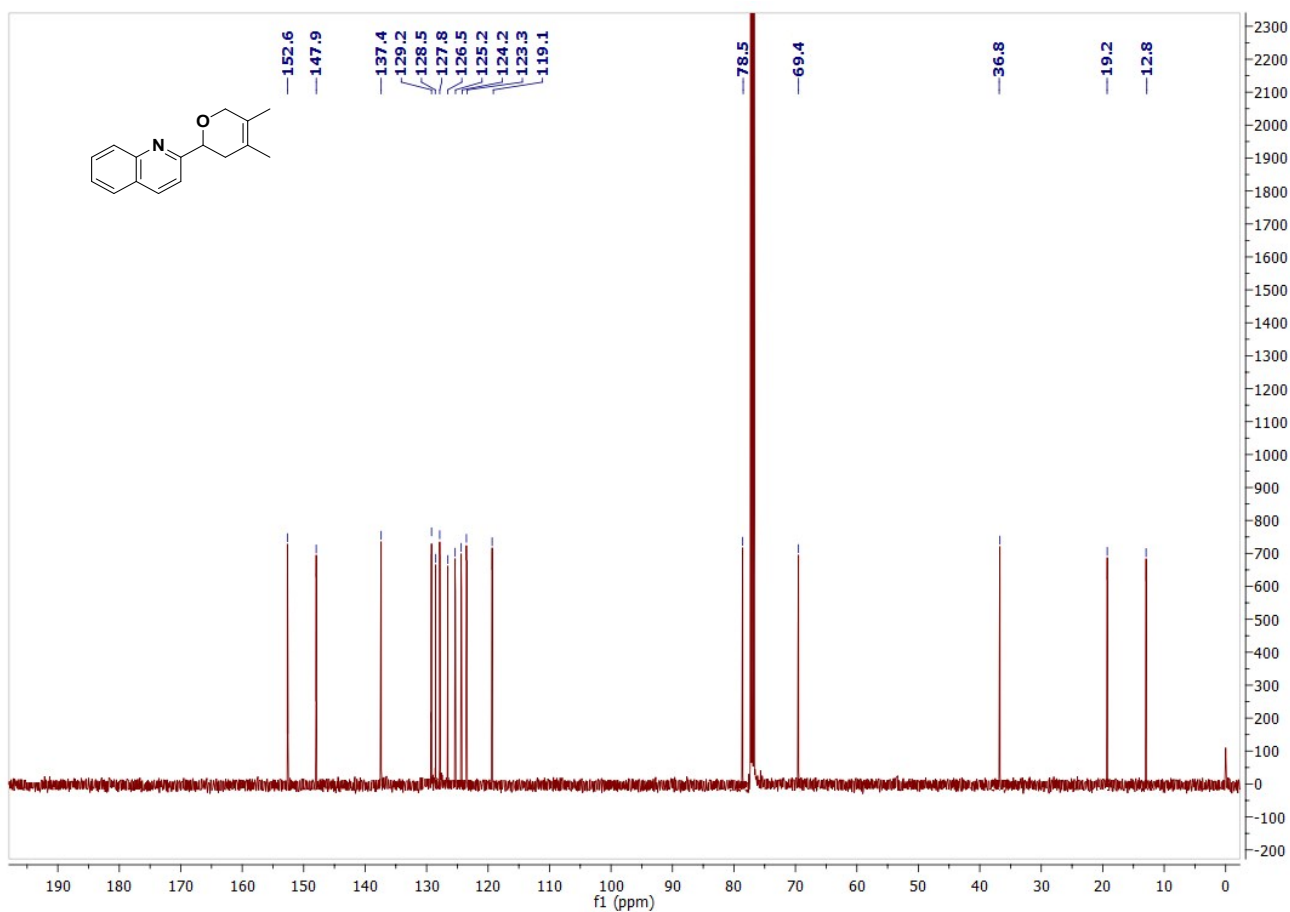



Fig. S51: <sup>1</sup>H NMR Spectra (CDCl<sub>3</sub>, 300 MHz, ppm) of compound 15:

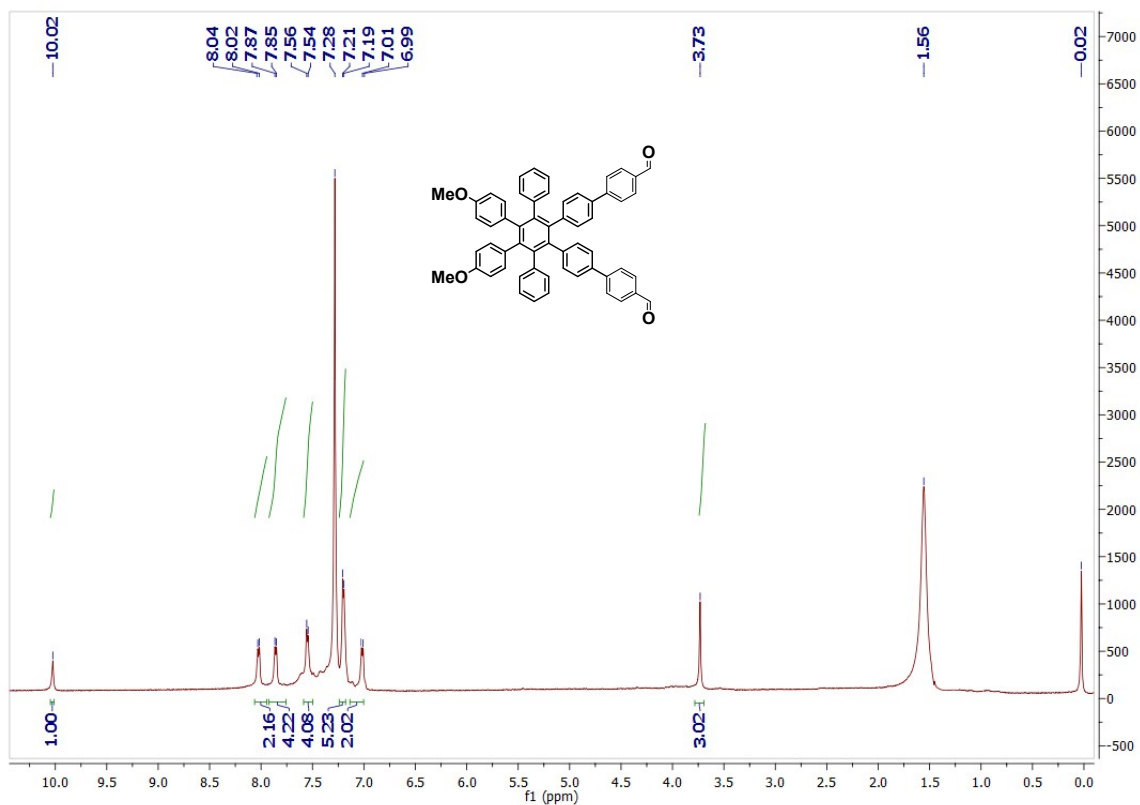

Fig. S52A: <sup>1</sup>H NMR Spectra (CDCl<sub>3</sub>, 300 MHz, ppm) of compound 16:

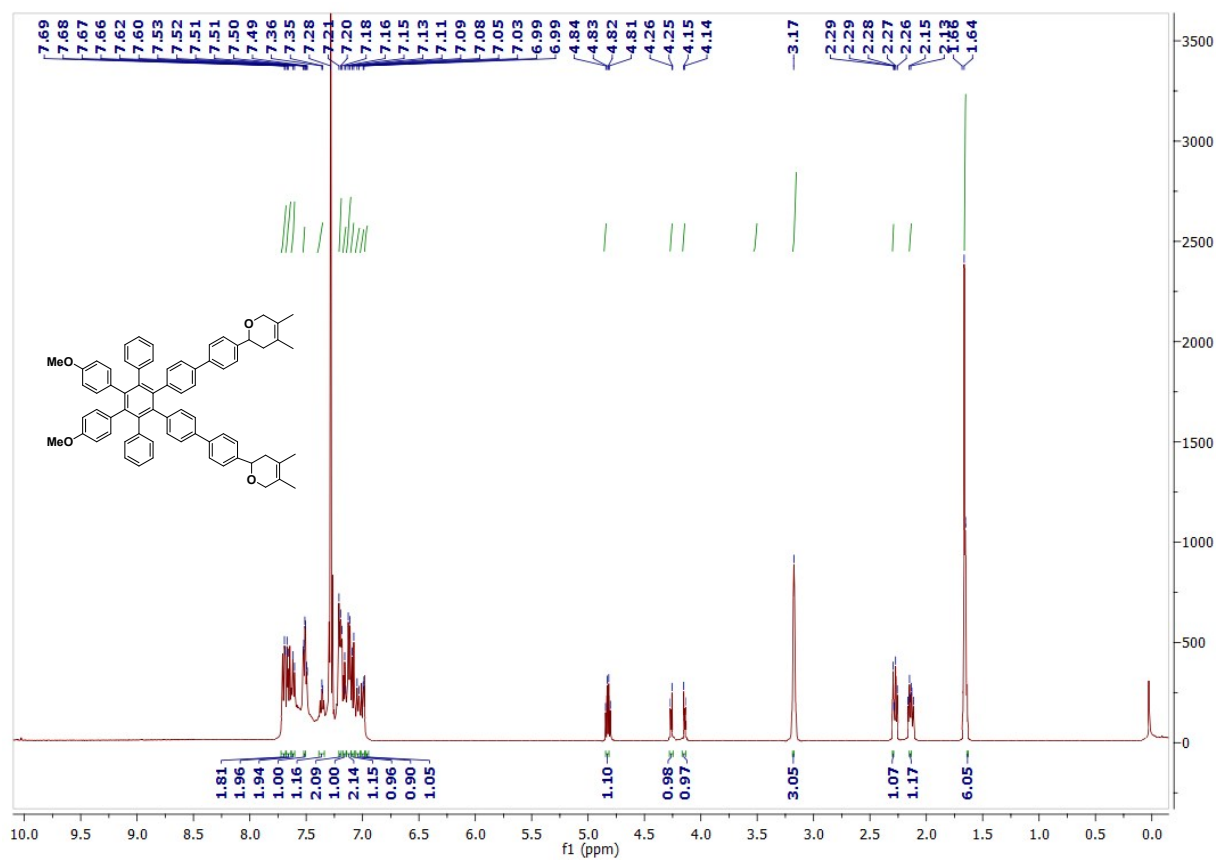

Fig. S52B:  $^{13}\text{C}$  NMR Spectra ( $\text{CDCl}_3$ , 125 MHz, ppm) of compound 16:

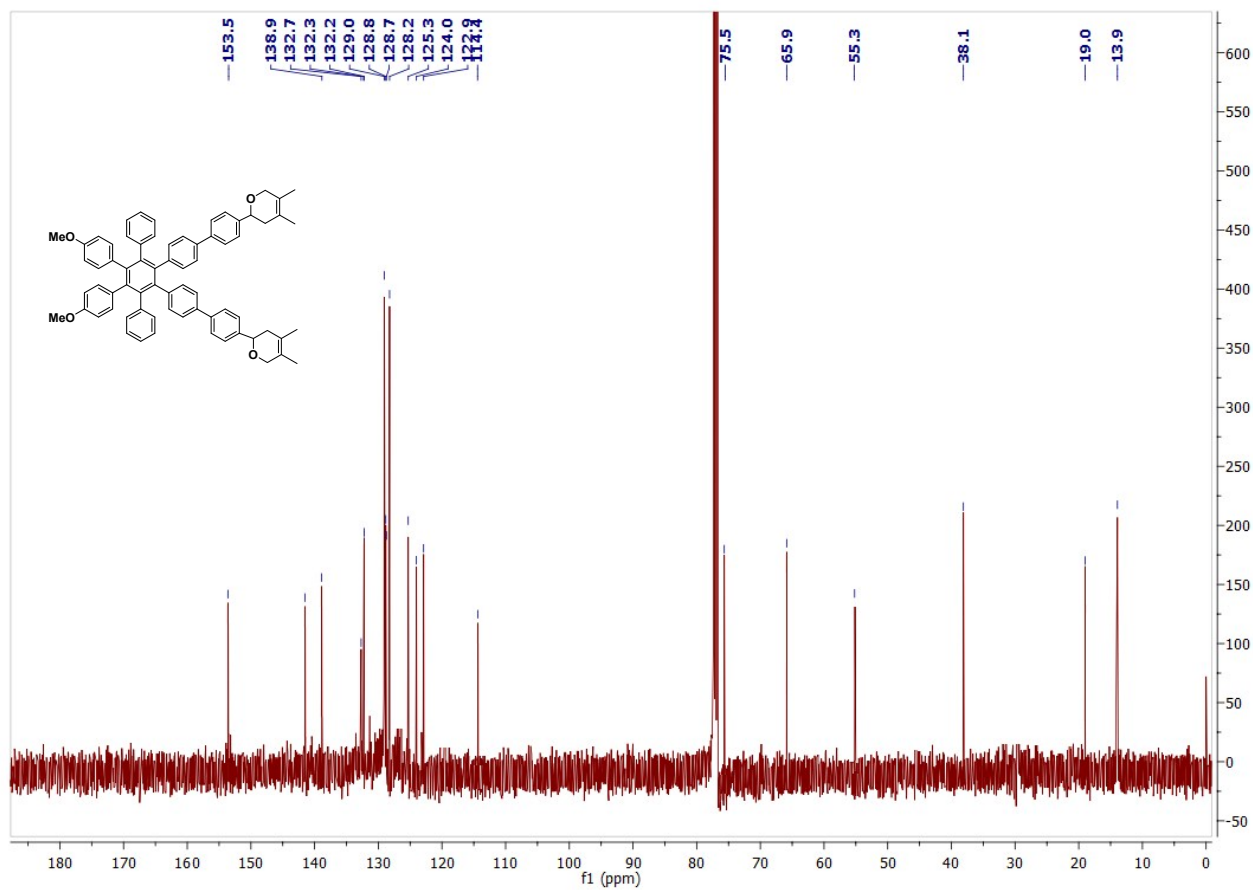

Supplement: c5gc02337h1.pdf [file c5gc02337h1.pdf]
